# Supplementary material for: Ethynyl π-coordinated and non-coordinated mononuclear Cu(i) halide diphosphine complexes: synthesis and photophysical studies
Source: Royal Society of Chemistry journal article supplement (doi:10.1039/d1nj05578j), 2022-01-01
Supplement: d1nj05578j1.pdf [file d1nj05578j1.pdf]

## Electronic Supplementary Information for

### Ethynyl $\pi$ -Coordinated and Non-Coordinated Mononuclear Cu(I)

### Halide Diphosphine Complexes: Synthesis and Photophysical Studies

Nian Liu<sup>a</sup>, Li Liu<sup>\*a</sup>, Xin-Xin Zhong<sup>\*a</sup>, Fa-Bao Li<sup>a</sup>, Feng-Yan Li<sup>\*b</sup>, Hai-Mei Qin<sup>c</sup>

<sup>a</sup> Collaborative Innovation Center for Advanced Organic Chemical Materials Co-constructed by the Province and Ministry, Ministry of Education Key Laboratory for the Synthesis and Application of Organic Functional Molecules, Hubei University, Wuhan 430062, P. R. China. E-mail: liulihubei@hubu.edu.cn; xxzhong@hubu.edu.cn

<sup>b</sup> Key Laboratory of Polyoxometalates Science of Ministry of Education, College of Chemistry, Northeast Normal University, Changchun, 130024, P. R. China. E-mail: lify525@nenu.edu.cn

<sup>c</sup> Department of Chemistry, Xiamen University, Xiamen 361005, P. R. China.

## Contents

### 1. NMR and mass spectra

**Figure S1.** <sup>1</sup>H NMR spectrum of **L1** in CDCl<sub>3</sub>.

**Figure S2.** <sup>13</sup>C NMR spectrum of **L1** in CDCl<sub>3</sub>.

**Figure S3.** <sup>31</sup>P NMR spectrum of **L1** in CDCl<sub>3</sub>.

**Figure S4.** <sup>1</sup>H NMR spectrum of **L2** in CDCl<sub>3</sub>.

**Figure S5.** <sup>13</sup>C NMR spectrum of **L2** in CDCl<sub>3</sub>.

**Figure S6.** <sup>31</sup>P NMR spectrum of **L2** in CDCl<sub>3</sub>.

**Figure S7.** <sup>1</sup>H NMR spectrum of **L3** in CDCl<sub>3</sub>.

**Figure S8.** <sup>13</sup>C NMR spectrum of **L3** in CDCl<sub>3</sub>.

**Figure S9.** <sup>31</sup>P NMR spectrum of **L3** in CDCl<sub>3</sub>.

**Figure S10.** <sup>1</sup>H NMR spectrum of **1** in CDCl<sub>3</sub>.

**Figure S11.** <sup>31</sup>P NMR spectrum of **1** in CDCl<sub>3</sub>.

**Figure S12.** <sup>1</sup>H NMR spectrum of **2** in CDCl<sub>3</sub>.

**Figure S13.**  $^{31}\text{P}$  NMR spectrum of **2** in  $\text{CDCl}_3$ .

**Figure S14.**  $^1\text{H}$  NMR spectrum of **3** in  $\text{CDCl}_3$ .

**Figure S15.**  $^{31}\text{P}$  NMR spectrum of **3** in  $\text{CDCl}_3$ .

**Figure S16.**  $^1\text{H}$  NMR spectrum of **4** in  $\text{CDCl}_3$ .

**Figure S17.**  $^{31}\text{P}$  NMR spectrum of **4** in  $\text{CDCl}_3$ .

**Figure S18.**  $^1\text{H}$  NMR spectrum of **5** in  $\text{CDCl}_3$ .

**Figure S19.**  $^{31}\text{P}$  NMR spectrum of **5** in  $\text{CDCl}_3$ .

**Figure S20.**  $^1\text{H}$  NMR spectrum of **6** in  $\text{CDCl}_3$ .

**Figure S21.**  $^{31}\text{P}$  NMR spectrum of **6** in  $\text{CDCl}_3$ .

**Figure S22.**  $^1\text{H}$  NMR spectrum of **7** in  $\text{CDCl}_3$ .

**Figure S23.**  $^{31}\text{P}$  NMR spectrum of **7** in  $\text{CDCl}_3$ .

**Figure S24.** Mass spectrum of **L1**.

**Figure S25.** Mass spectrum of **L2**.

**Figure S26.** Mass spectrum of **L3**.

**Figure S27.** Mass spectrum of complex **1**.

**Figure S28.** Mass spectrum of complex **2**.

**Figure S29.** Mass spectrum of complex **3**.

**Figure S30.** Mass spectrum of complex **4**.

**Figure S31.** Mass spectrum of complex **5**.

**Figure S32.** Mass spectrum of complex **6**.

**Figure S33.** Mass spectrum of complex **7**.

## 2. Molecular structures

**Figure S34.** The dihedral angles between the Cu-X-P plane and the plane of  $\text{C}\equiv\text{C}$  and its connected phenyl ring in complex **1**.

**Figure S35.** The dihedral angles between the Cu-X-P plane and the plane of  $\text{C}\equiv\text{C}$  and its connected phenyl ring in complex **2**.

**Figure S36.** The dihedral angles between the Cu-X-P plane and the plane of  $\text{C}\equiv\text{C}$  and its connected phenyl ring in complex **3**.

**Figure S37.** The dihedral angles between the Cu-X-P plane and the plane of C≡C and its connected phenyl ring in complex **4**.

**Figure S38.** The dihedral angles between the Cu-X-P plane and the plane of C≡C and its connected phenyl ring in complex **5**.

**Figure S39.** The dihedral angles between the Cu-X-P plane and the plane of C≡C and its connected phenyl ring in complex **6**.

**Figure S40.** The dihedral angles between the Cu-X-P plane and the plane of C≡C and its connected phenyl ring in complex **7**.

### 3. Photophysical properties

**Figure S41.** Normalized excitation spectra of **1-7** in solid state at 298 K ( $\lambda_{em} = 582$  nm for **1**,  $\lambda_{em} = 607$  nm for **2**,  $\lambda_{em} = 580$  nm for **3**,  $\lambda_{em} = 540$  nm for **4**,  $\lambda_{em} = 545$  nm for **5**,  $\lambda_{em} = 574$  nm for **6**,  $\lambda_{em} = 550$  nm for **7**).

**Figure S42.** Time profiles of luminescence decay and exponential fit spectrum of **1** at 298 K ( $\lambda_{em} = 582$  nm (up) and  $\lambda_{em} = 753$  nm (down)).

**Figure S43.** Time profiles of luminescence decay and exponential fit spectrum of **2** at 298 K ( $\lambda_{em} = 607$  nm (up) and  $\lambda_{em} = 694$  nm (down)).

**Figure S44.** Time profiles of luminescence decay and exponential fit spectrum of **3** at 298 K ( $\lambda_{em} = 572$  nm (up) and  $\lambda_{em} = 685$  nm (down)).

**Figure S45.** Time profiles of luminescence decay and exponential fit spectrum of **4** at 298 K ( $\lambda_{em} = 540$  nm).

**Figure S46.** Time profiles of luminescence decay and exponential fit spectrum of **5** at 298 K ( $\lambda_{em} = 545$  nm).

**Figure S47.** Time profiles of luminescence decay and exponential fit spectrum of **6** at 298 K ( $\lambda_{em} = 574$  nm).

**Figure S48.** Time profiles of luminescence decay and exponential fit spectrum of **7** at 298 K ( $\lambda_{em} = 550$  nm).

**Figure S49.** Time profiles of luminescence decay and exponential fit spectrum of **1** at 77 K ( $\lambda_{em} = 517$  nm).

**Figure S50.** Time profiles of luminescence decay and exponential fit spectrum of **2** at 77 K ( $\lambda_{\text{em}} = 510$  nm).

**Figure S51.** Time profiles of luminescence decay and exponential fit spectrum of **3** at 77 K ( $\lambda_{\text{em}} = 580$  nm).

**Figure S52.** Time profiles of luminescence decay and exponential fit spectrum of **4** at 77 K ( $\lambda_{\text{em}} = 538$  nm).

**Figure S53.** Time profiles of luminescence decay and exponential fit spectrum of **5** at 77 K ( $\lambda_{\text{em}} = 537$  nm).

**Figure S54.** Time profiles of luminescence decay and exponential fit spectrum of **6** at 77 K ( $\lambda_{\text{em}} = 543$  nm).

**Figure S55.** Time profiles of luminescence decay and exponential fit spectrum of **7** at 77 K ( $\lambda_{\text{em}} = 556$  nm).

**Figure S56.** Luminescence decay of **2** at 298 K in air and under vacuum ( $\lambda_{\text{em}} = 607$  nm).

**Figure S57.** Luminescence decay of **4** at 298 K in air and under vacuum ( $\lambda_{\text{em}} = 540$  nm).

#### 4. Computational details

**Figure S58.** The absorption spectrum of complex **1** in  $\text{CH}_2\text{Cl}_2$ .

**Figure S59.** The absorption spectrum of complex **2** in  $\text{CH}_2\text{Cl}_2$ .

**Figure S60.** The absorption spectrum of complex **3** in  $\text{CH}_2\text{Cl}_2$ .

**Figure S61.** The absorption spectrum of complex **4** in  $\text{CH}_2\text{Cl}_2$ .

**Figure S62.** The absorption spectrum of complex **5** in  $\text{CH}_2\text{Cl}_2$ .

**Figure S63.** The absorption spectrum of complex **6** in  $\text{CH}_2\text{Cl}_2$ .

**Figure S64.** The absorption spectrum of complex **7** in  $\text{CH}_2\text{Cl}_2$ .

**Figure S65.** Contour plots of frontier molecular orbitals of complexes **1–7** in  $\text{CH}_2\text{Cl}_2$ .

**Figure S66.** The core structures in the optimized  $S_0$ ,  $S_1$ , and  $T_1$  geometries for complexes **1–7**.

**Table S1.** Computed excitation states for complex **1** in  $\text{CH}_2\text{Cl}_2$ .

**Table S2.** Computed excitation states for complex **2** in  $\text{CH}_2\text{Cl}_2$ .

**Table S3.** Computed excitation states for complex **3** in CH<sub>2</sub>Cl<sub>2</sub>.

**Table S4.** Computed excitation states for complex **4** in CH<sub>2</sub>Cl<sub>2</sub>.

**Table S5.** Computed excitation states for complex **5** in CH<sub>2</sub>Cl<sub>2</sub>.

**Table S6.** Computed excitation states for complex **6** in CH<sub>2</sub>Cl<sub>2</sub>.

**Table S7.** Computed excitation states for complex **7** in CH<sub>2</sub>Cl<sub>2</sub>.

**Table S8.** Selected bond lengths (Å) and angles (°) in the optimized S<sub>0</sub>, S<sub>1</sub>, and T<sub>1</sub> geometries for complexes **1-7**.

**Table S9.** Cartesian coordinates of the optimized S<sub>0</sub> geometry for complex **1**.

**Table S10.** Cartesian coordinates of the optimized S<sub>1</sub> geometry for complex **1**.

**Table S11.** Cartesian coordinates of the optimized T<sub>1</sub> geometry for complex **1**.

**Table S12.** Cartesian coordinates of the optimized S<sub>0</sub> geometry for complex **2**.

**Table S13.** Cartesian coordinates of the optimized S<sub>1</sub> geometry for complex **2**.

**Table S14.** Cartesian coordinates of the optimized T<sub>1</sub> geometry for complex **2**.

**Table S15.** Cartesian coordinates of the optimized S<sub>0</sub> geometry for complex **3**.

**Table S16.** Cartesian coordinates of the optimized S<sub>1</sub> geometry for complex **3**.

**Table S17.** Cartesian coordinates of the optimized T<sub>1</sub> geometry for complex **3**.

**Table S18.** Cartesian coordinates of the optimized S<sub>0</sub> geometry for complex **4**.

**Table S19.** Cartesian coordinates of the optimized S<sub>1</sub> geometry for complex **4**.

**Table S20.** Cartesian coordinates of the optimized T<sub>1</sub> geometry for complex **4**.

**Table S21.** Cartesian coordinates of the optimized S<sub>0</sub> geometry for complex **5**.

**Table S22.** Cartesian coordinates of the optimized S<sub>1</sub> geometry for complex **5**.

**Table S23.** Cartesian coordinates of the optimized T<sub>1</sub> geometry for complex **5**.

**Table S24.** Cartesian coordinates of the optimized S<sub>0</sub> geometry for complex **6**.

**Table S25.** Cartesian coordinates of the optimized S<sub>1</sub> geometry for complex **6**.

**Table S26.** Cartesian coordinates of the optimized T<sub>1</sub> geometry for complex **6**.

**Table S27.** Cartesian coordinates of the optimized S<sub>0</sub> geometry for complex **7**.

**Table S28.** Cartesian coordinates of the optimized S<sub>1</sub> geometry for complex **7**.

**Table S29.** Cartesian coordinates of the optimized T<sub>1</sub> geometry for complex **7**.

# 1. NMR and mass spectra

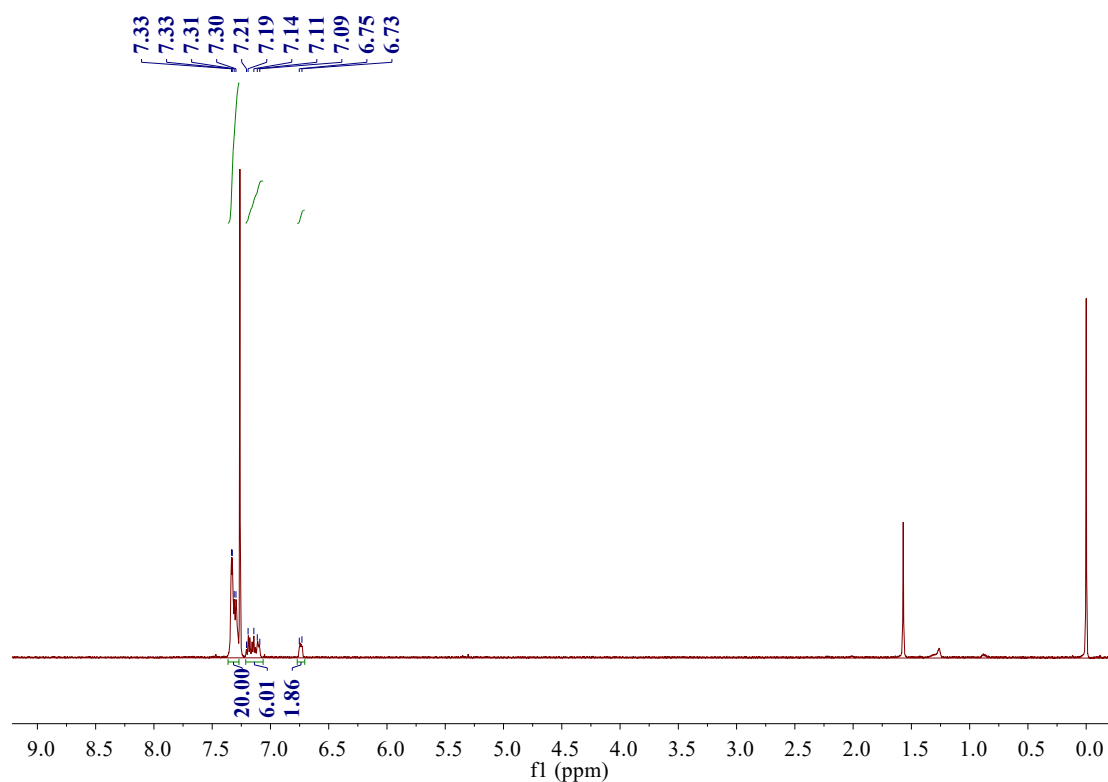

Figure S1. <sup>1</sup>H NMR spectrum of L1 in CDCl<sub>3</sub>.

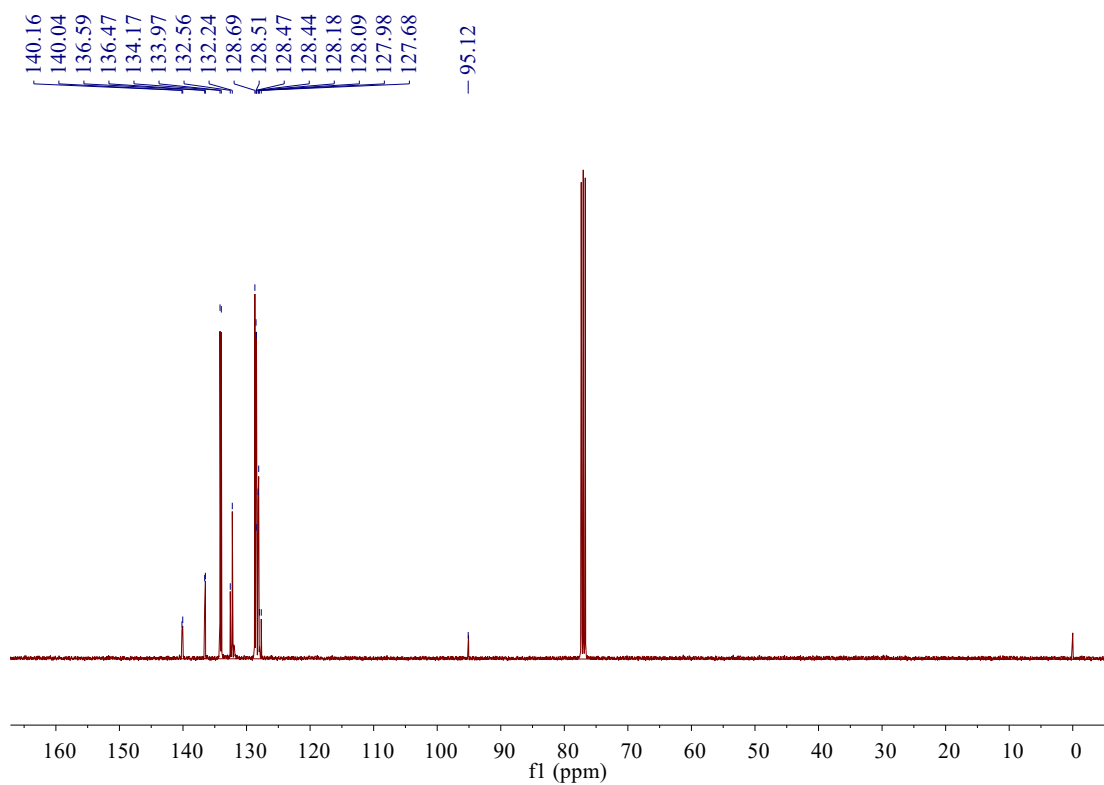

Figure S2. <sup>13</sup>C NMR spectrum of L1 in CDCl<sub>3</sub>.

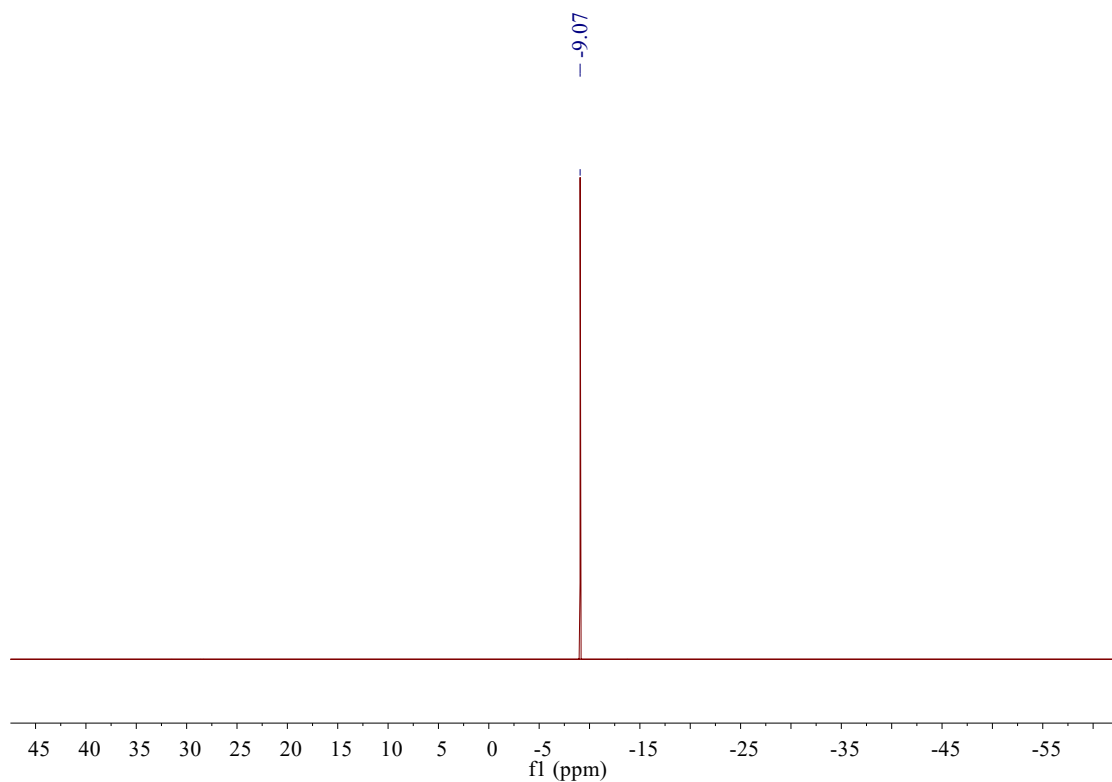

**Figure S3.** <sup>31</sup>P NMR spectrum of L1 in CDCl<sub>3</sub>.

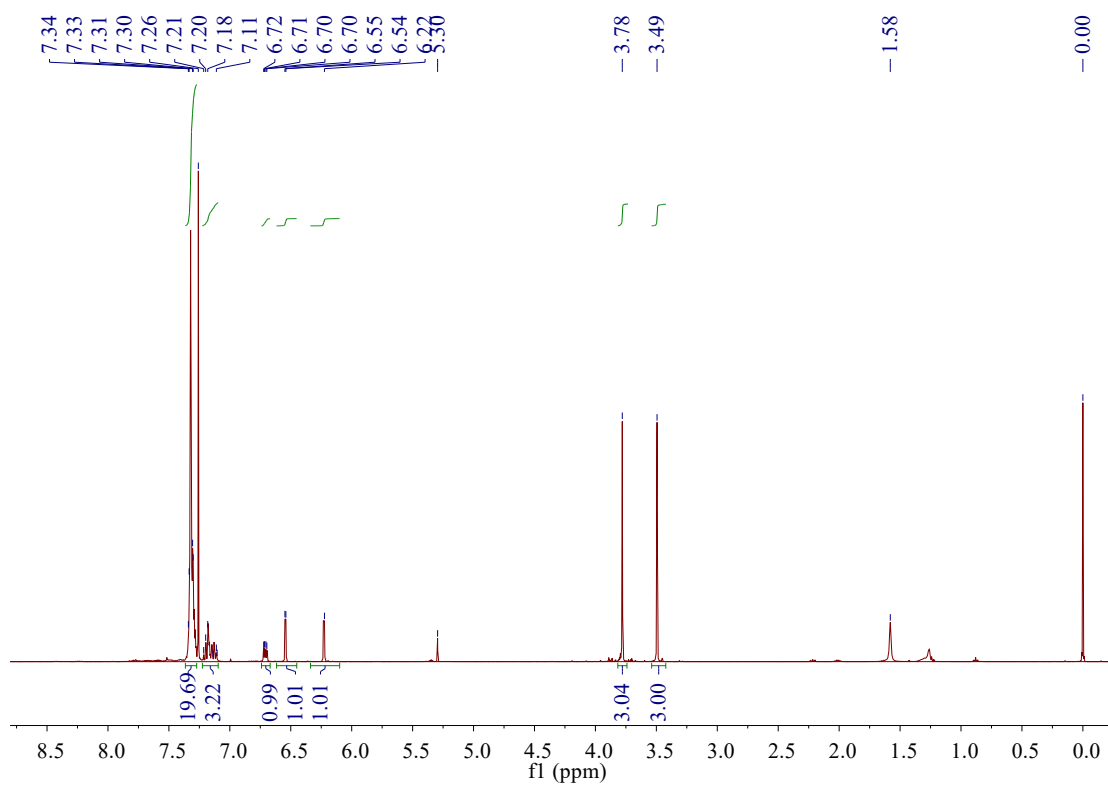

**Figure S4.** <sup>1</sup>H NMR spectrum of L2 in CDCl<sub>3</sub>.

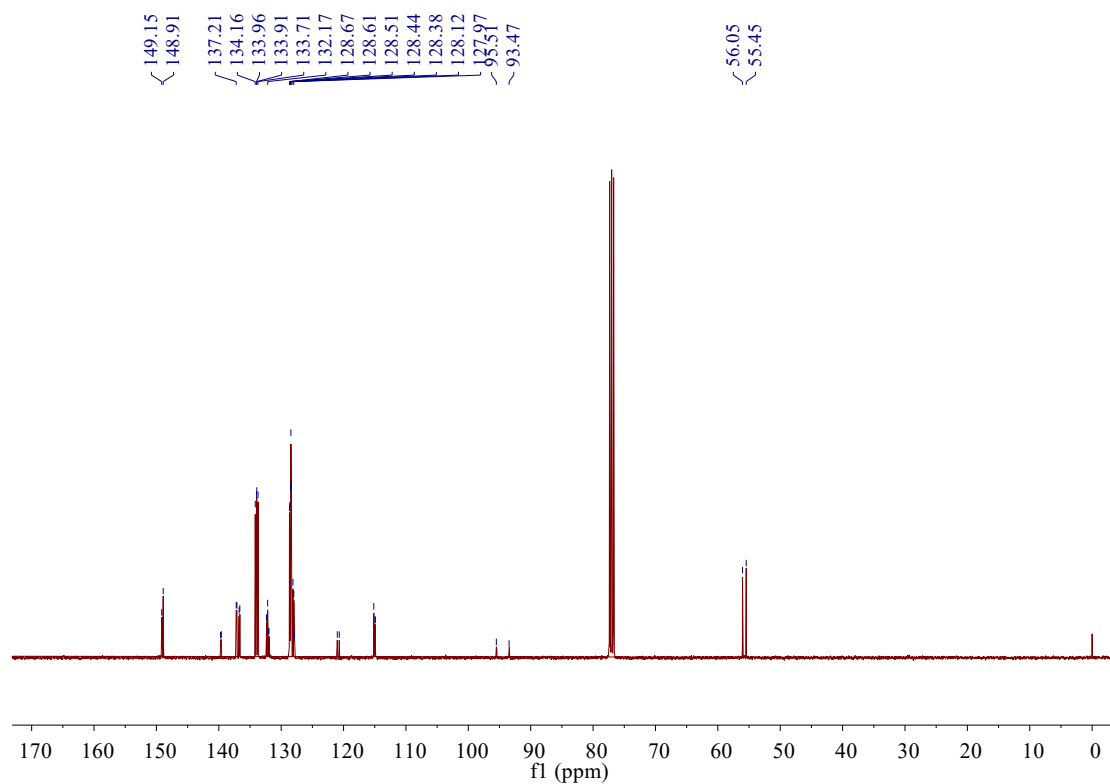

**Figure S5.**  $^{13}\text{C}$  NMR spectrum of **L2** in  $\text{CDCl}_3$ .

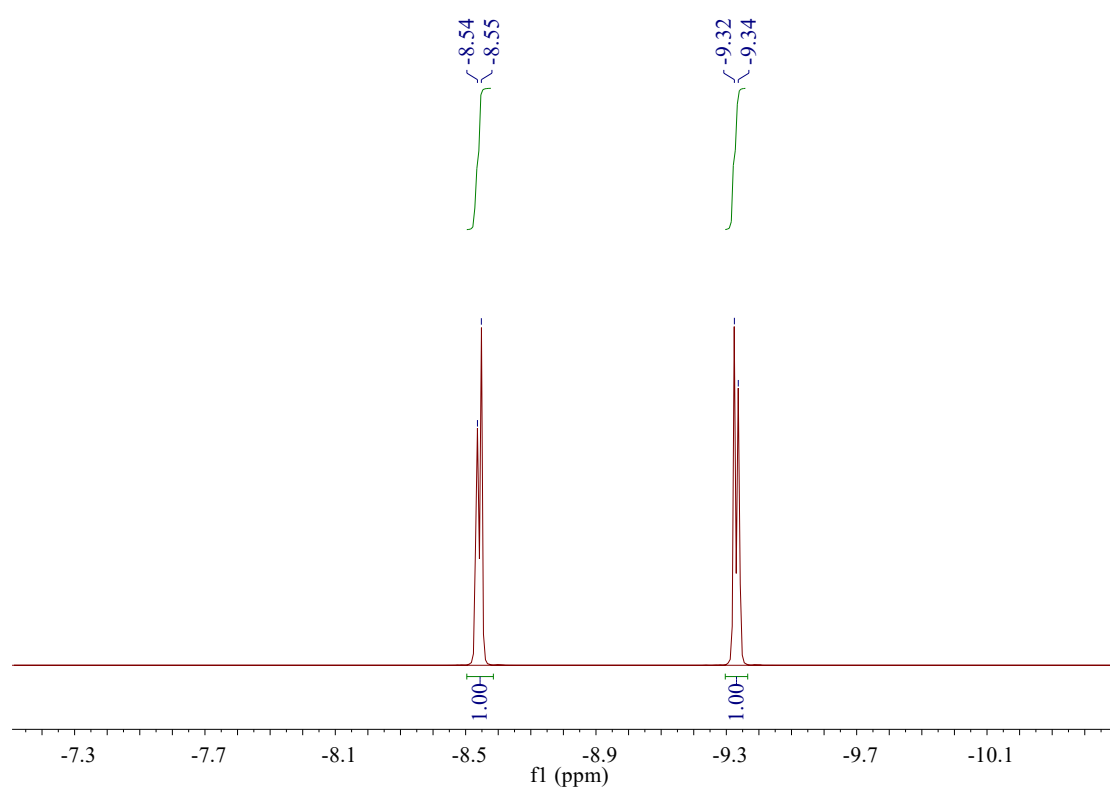

**Figure S6.**  $^{31}\text{P}$  NMR spectrum of **L2** in  $\text{CDCl}_3$ .



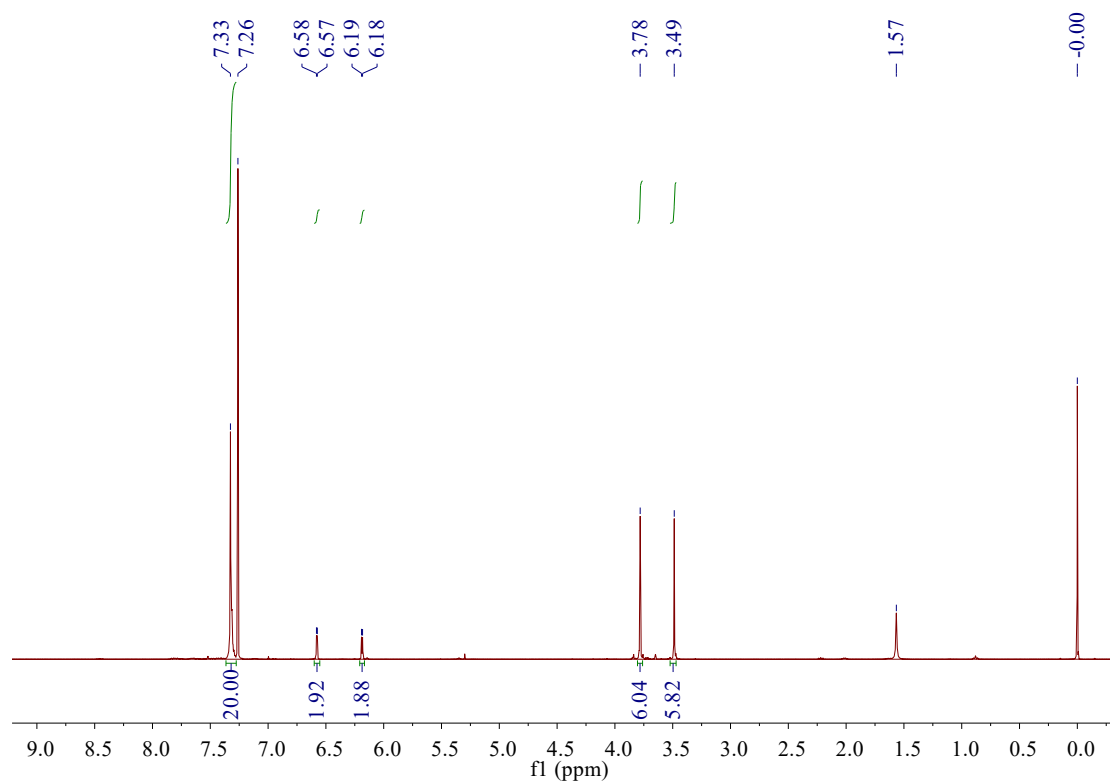

**Figure S7.** <sup>1</sup>H NMR spectrum of L3 in CDCl<sub>3</sub>.

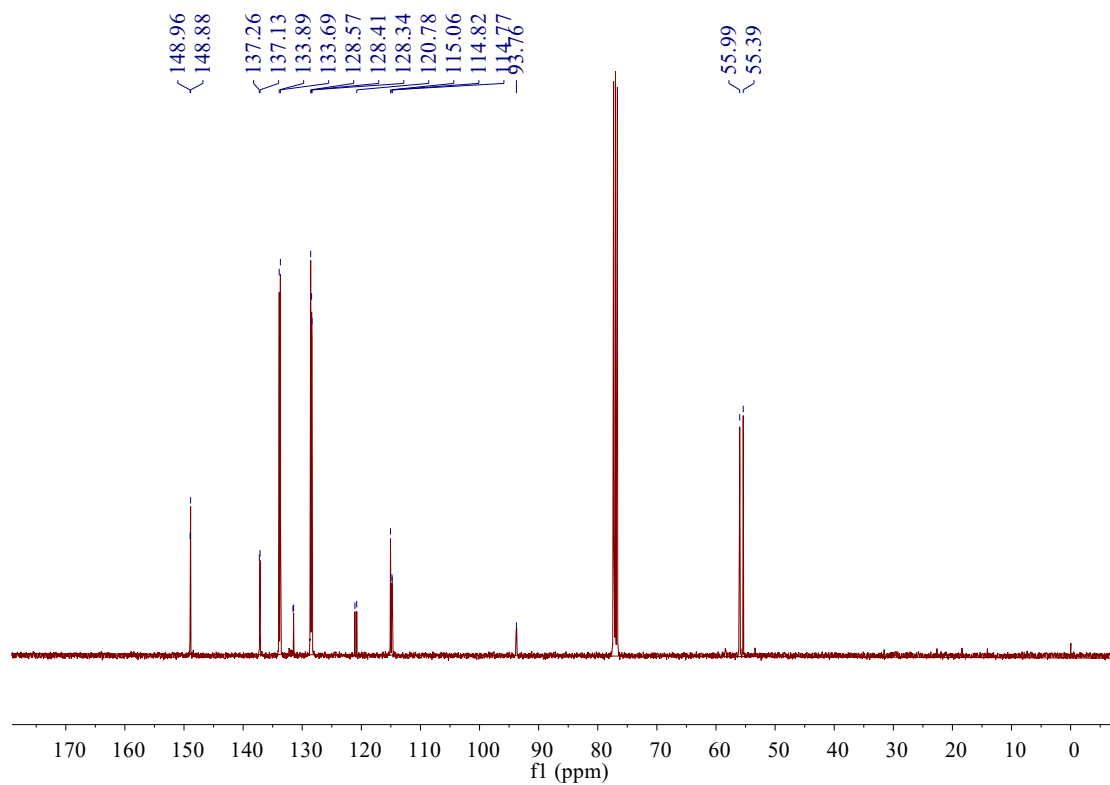

**Figure S8.** <sup>13</sup>C NMR spectrum of L3 in CDCl<sub>3</sub>.

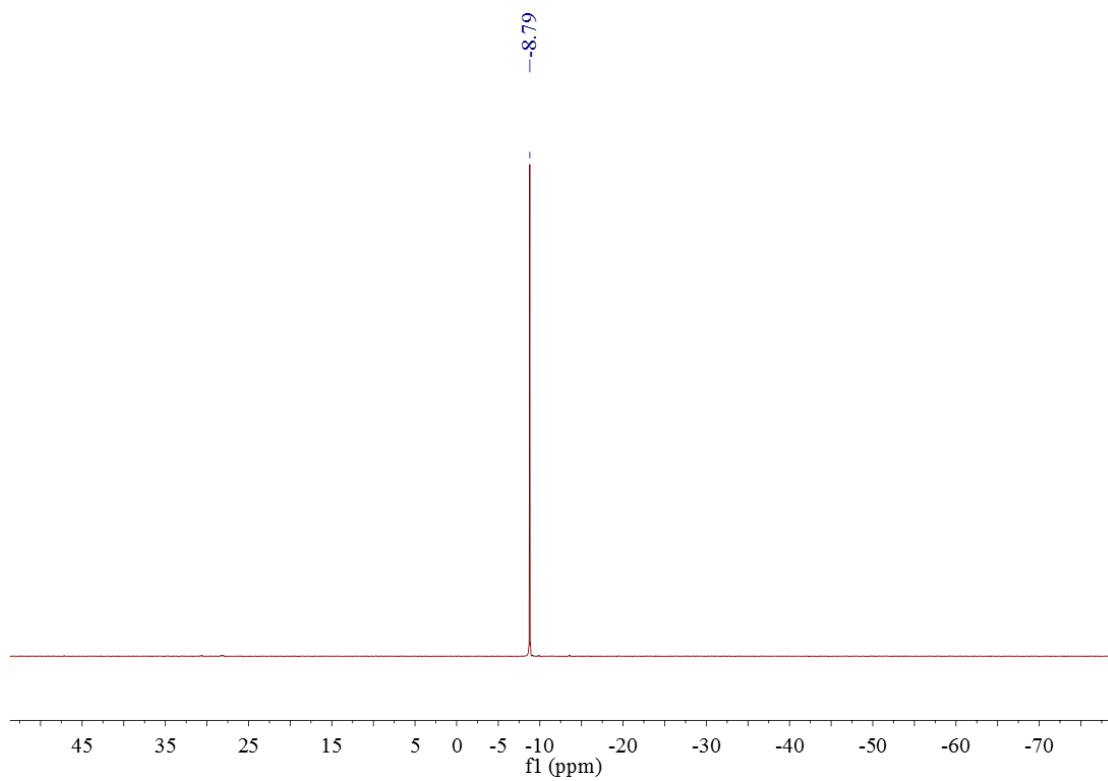

**Figure S9.**  $^{31}\text{P}$  NMR spectrum of **L3** in  $\text{CDCl}_3$ .

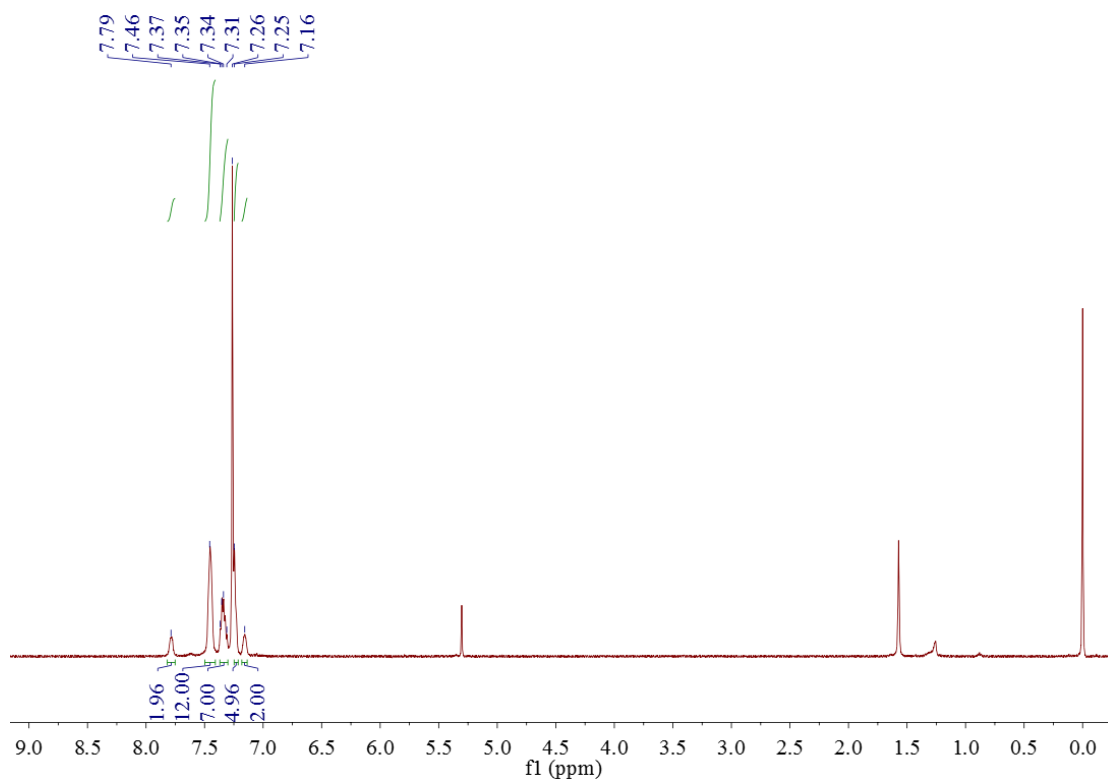

**Figure S10.**  $^1\text{H}$  NMR spectrum of **1** in  $\text{CDCl}_3$ .

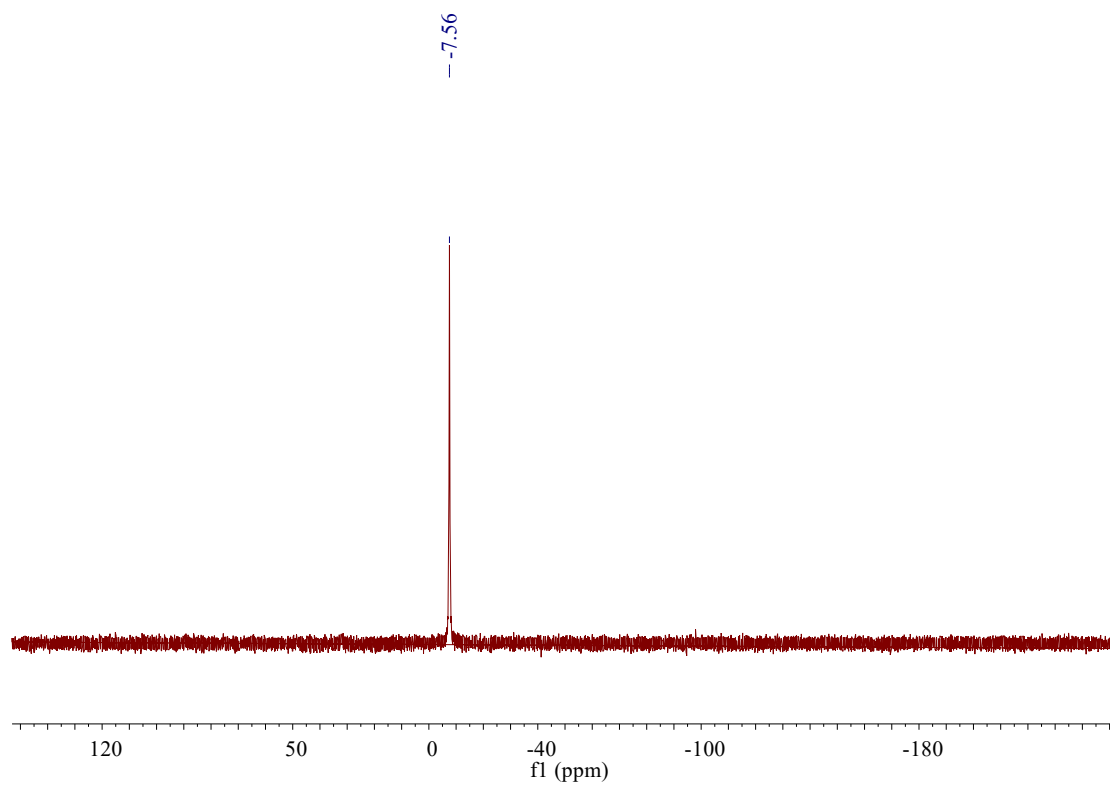

Figure S11. <sup>31</sup>P NMR spectrum of **1** in CDCl<sub>3</sub>.

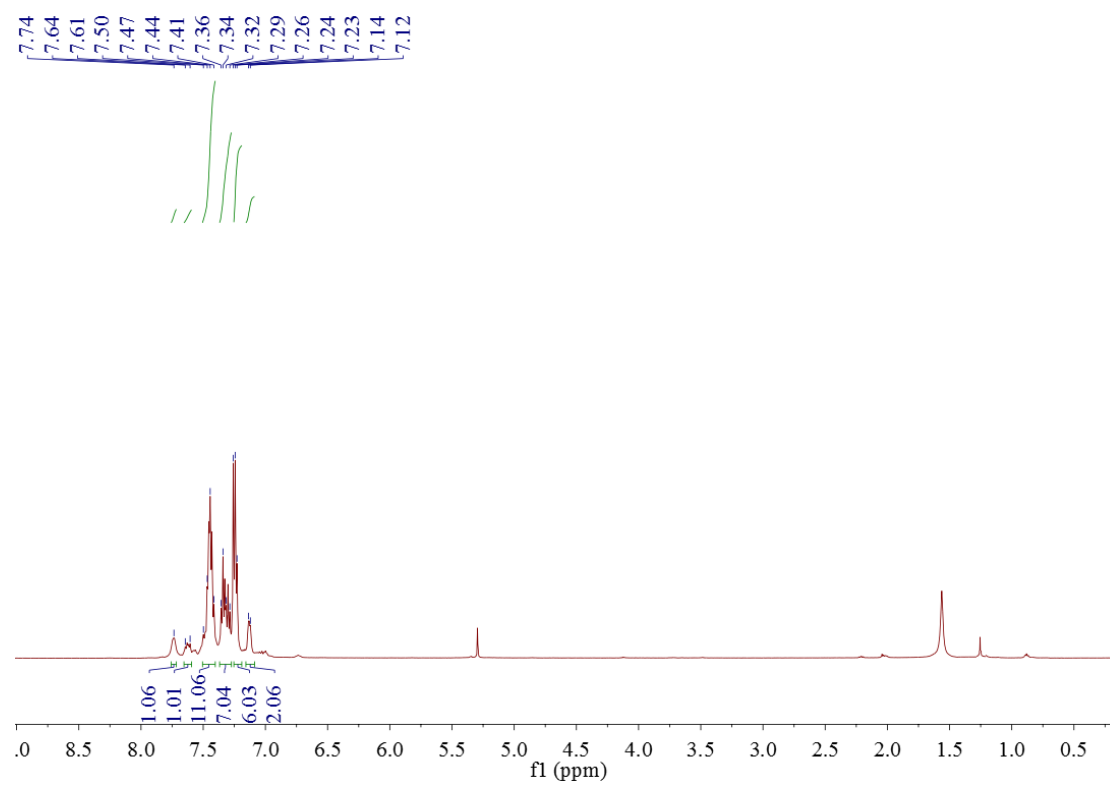

Figure S12. <sup>1</sup>H NMR spectrum of **2** in CDCl<sub>3</sub>.

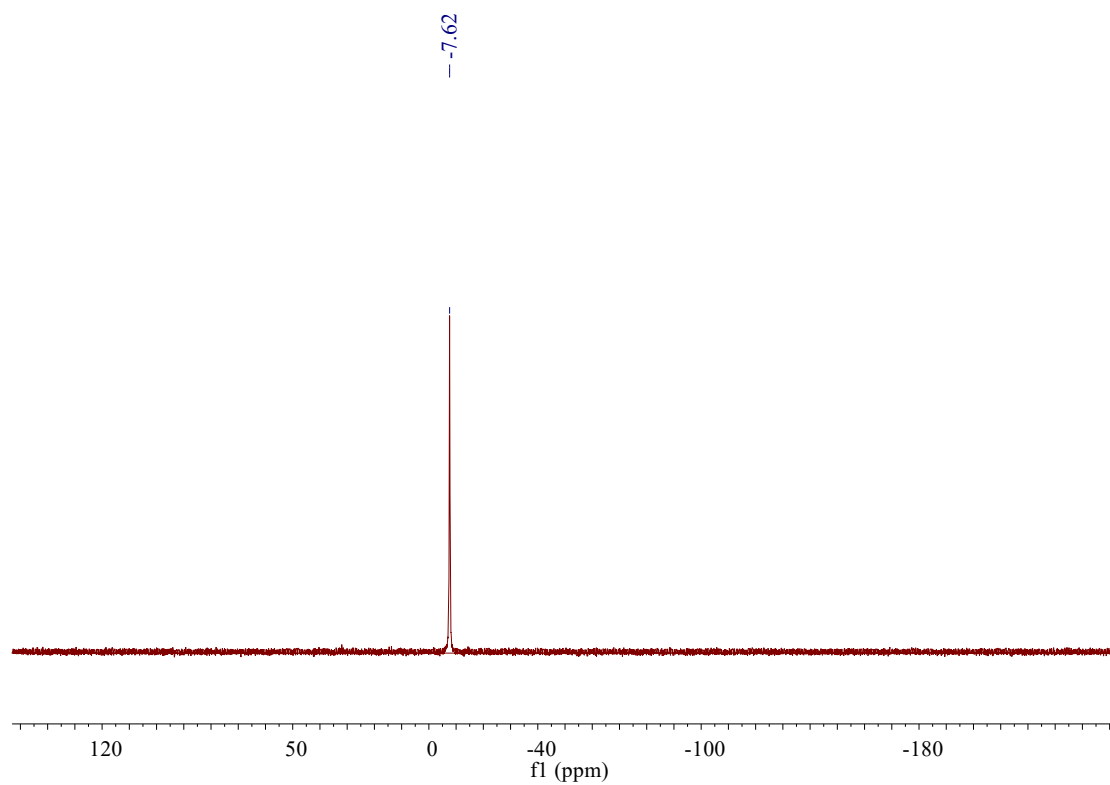

Figure S13. <sup>31</sup>P NMR spectrum of **2** in CDCl<sub>3</sub>.

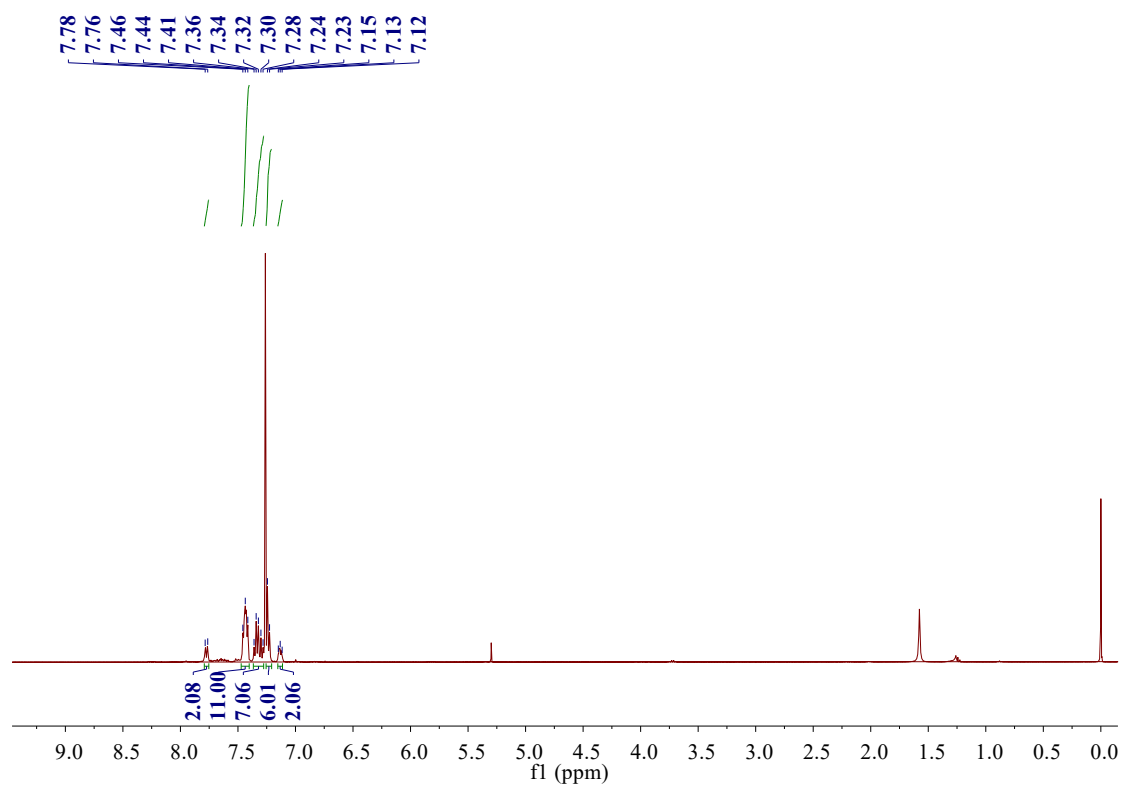

Figure S14. <sup>1</sup>H NMR spectrum of **3** in CDCl<sub>3</sub>.

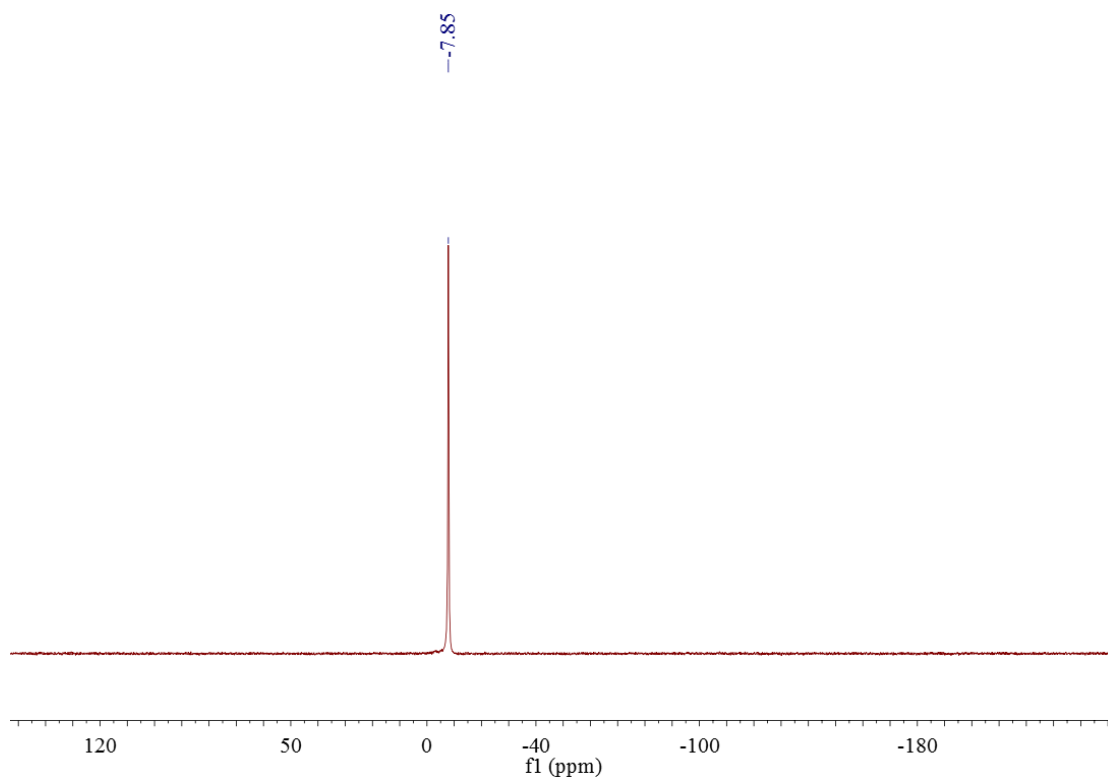

Figure S15. <sup>31</sup>P NMR spectrum of **3** in CDCl<sub>3</sub>.

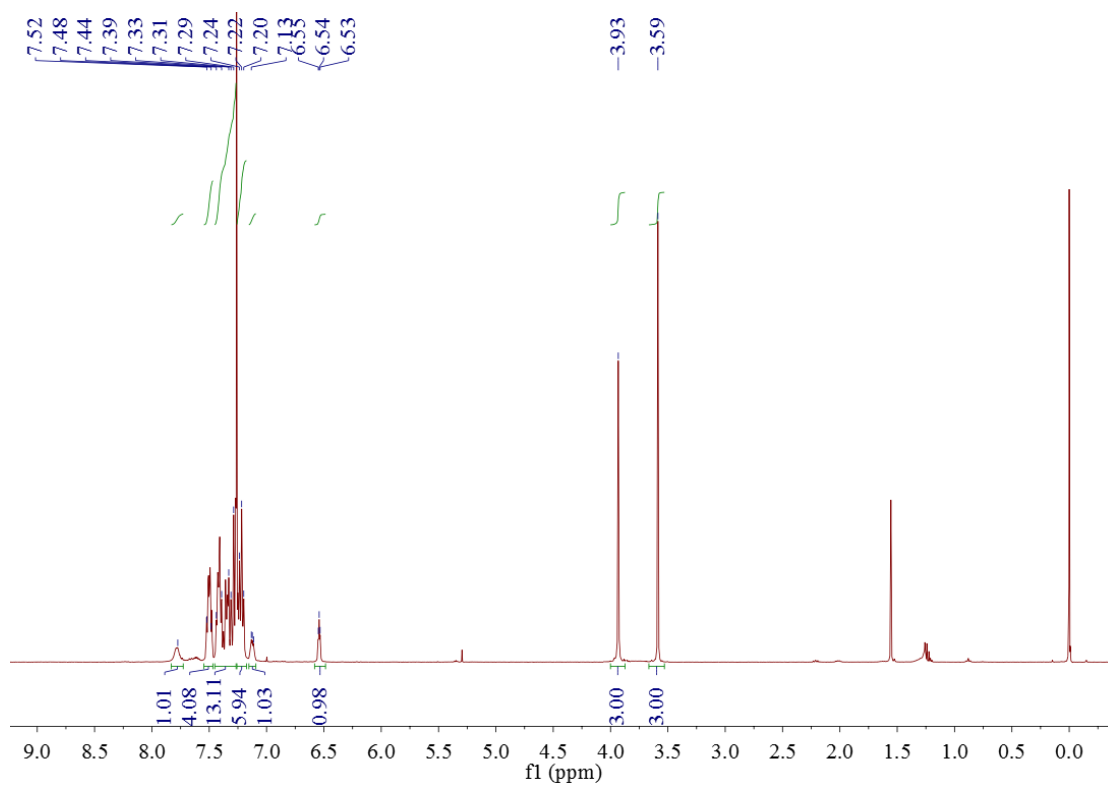

Figure S16. <sup>1</sup>H NMR spectrum of **4** in CDCl<sub>3</sub>.

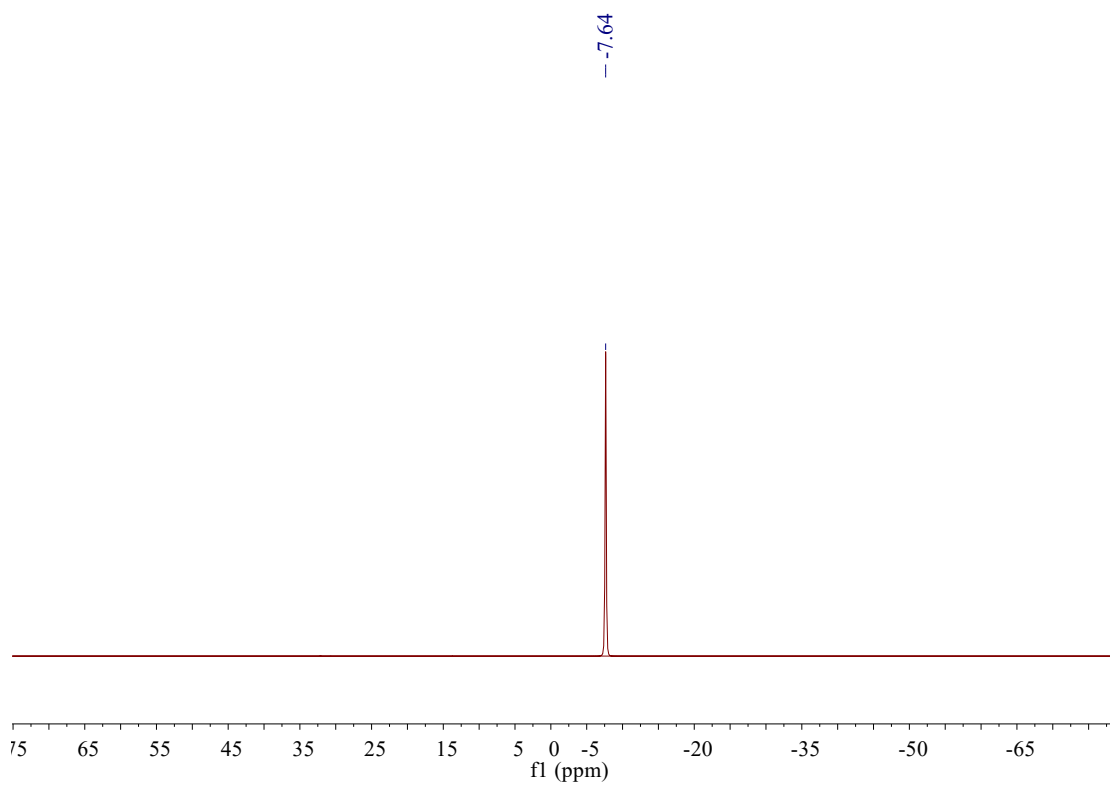

Figure S17. <sup>31</sup>P NMR spectrum of **4** in CDCl<sub>3</sub>.

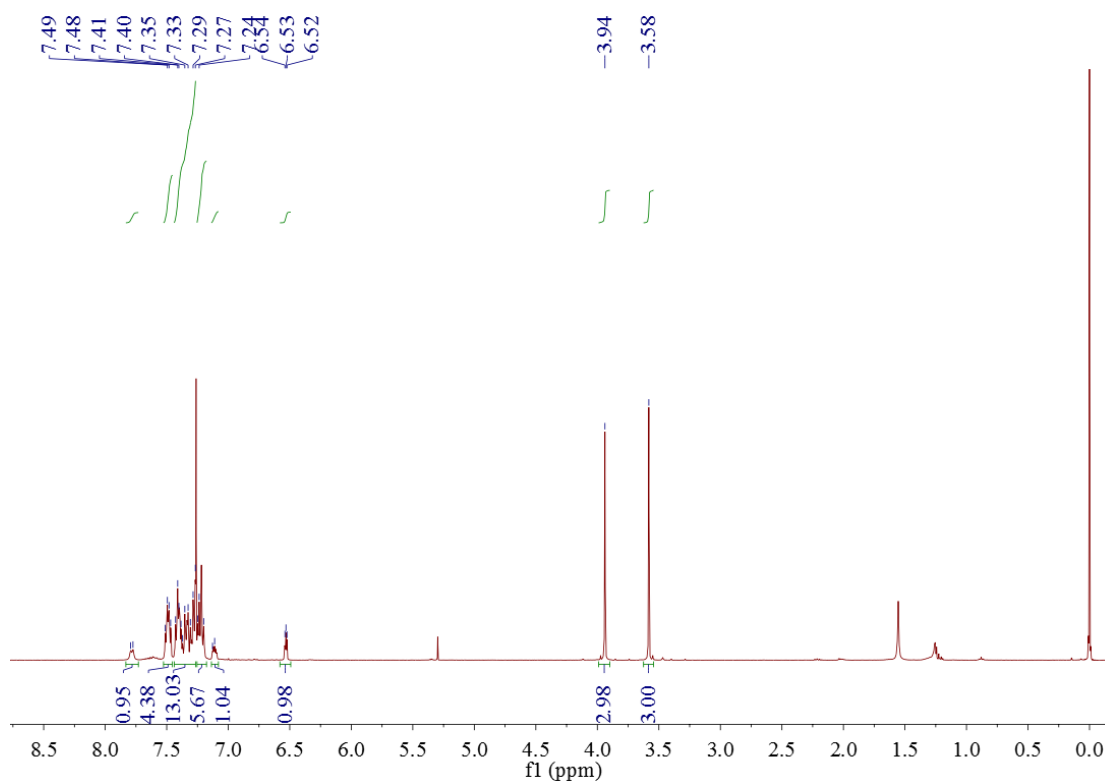

Figure S18. <sup>1</sup>H NMR spectrum of **5** in CDCl<sub>3</sub>.

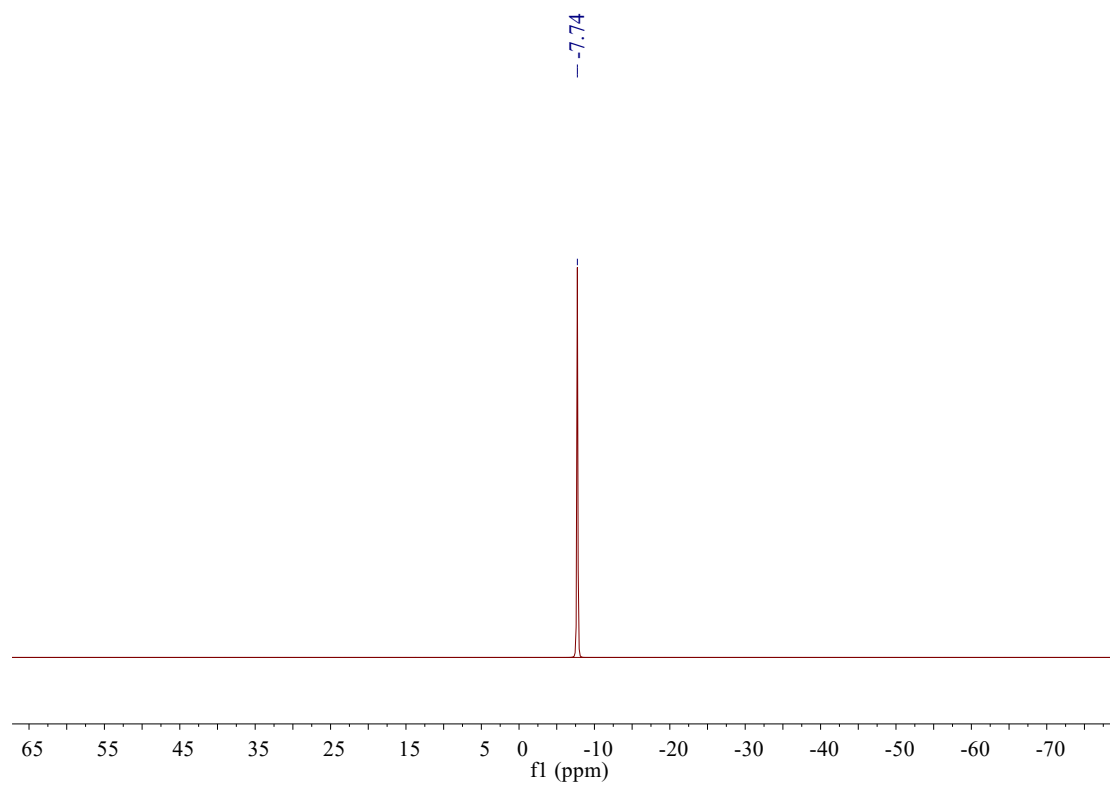

Figure S19. <sup>31</sup>P NMR spectrum of **5** in CDCl<sub>3</sub>.

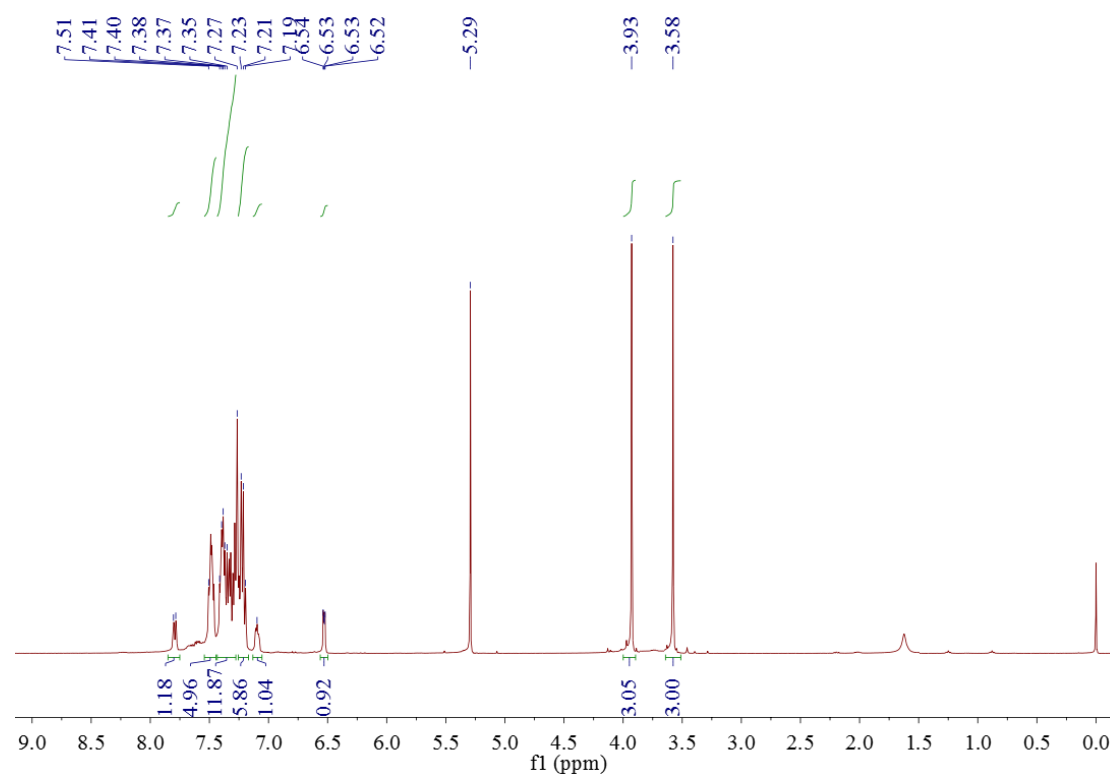

Figure S20. <sup>1</sup>H NMR spectrum of **6** in CDCl<sub>3</sub>.

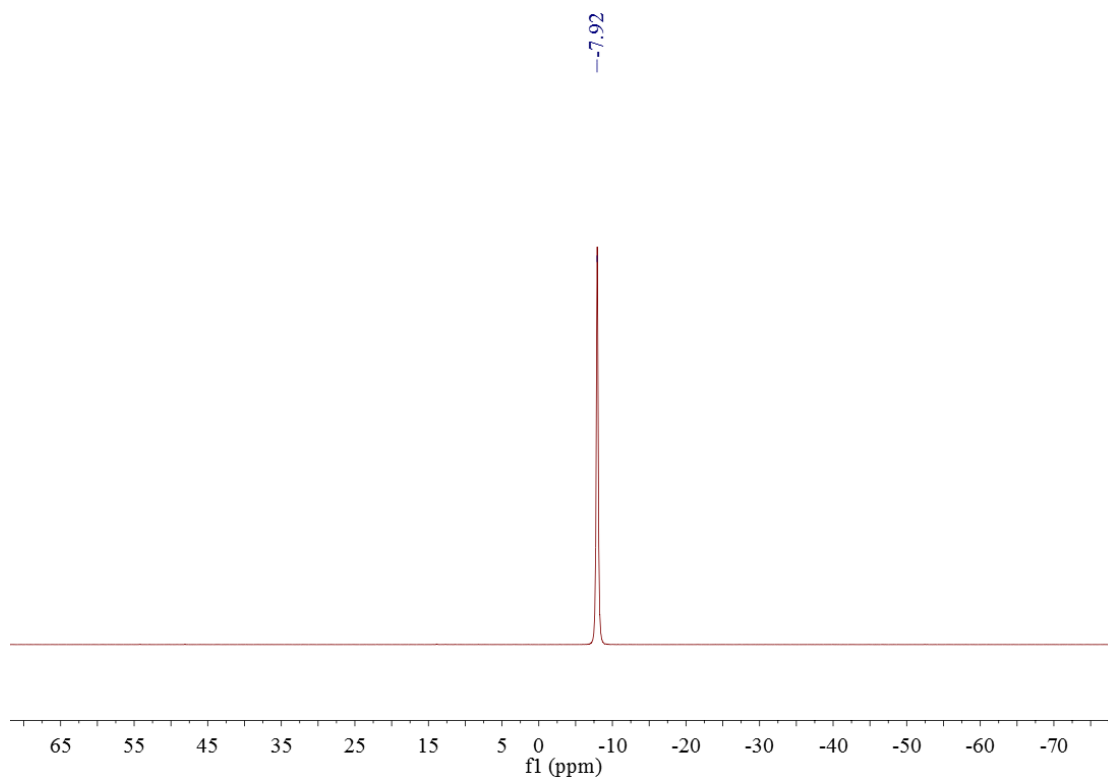

Figure S21. <sup>31</sup>P NMR spectrum of 6 in CDCl<sub>3</sub>.

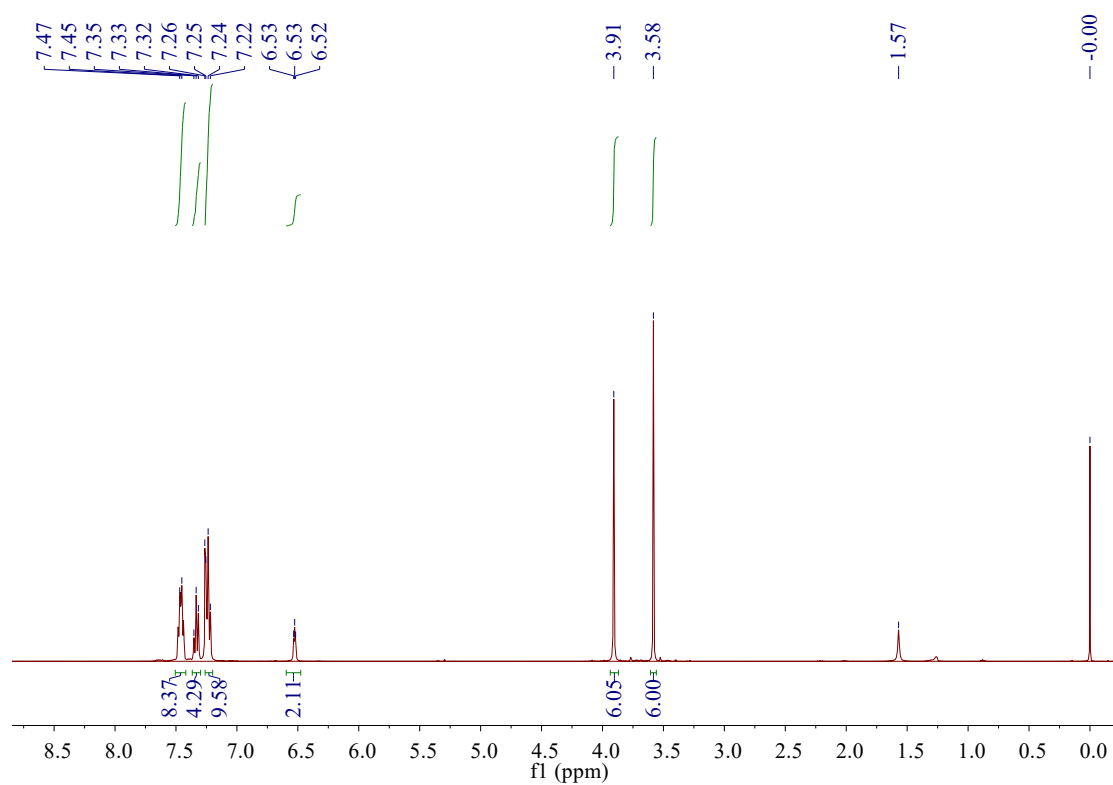

Figure S22. <sup>1</sup>H NMR spectrum of 7 in CDCl<sub>3</sub>.



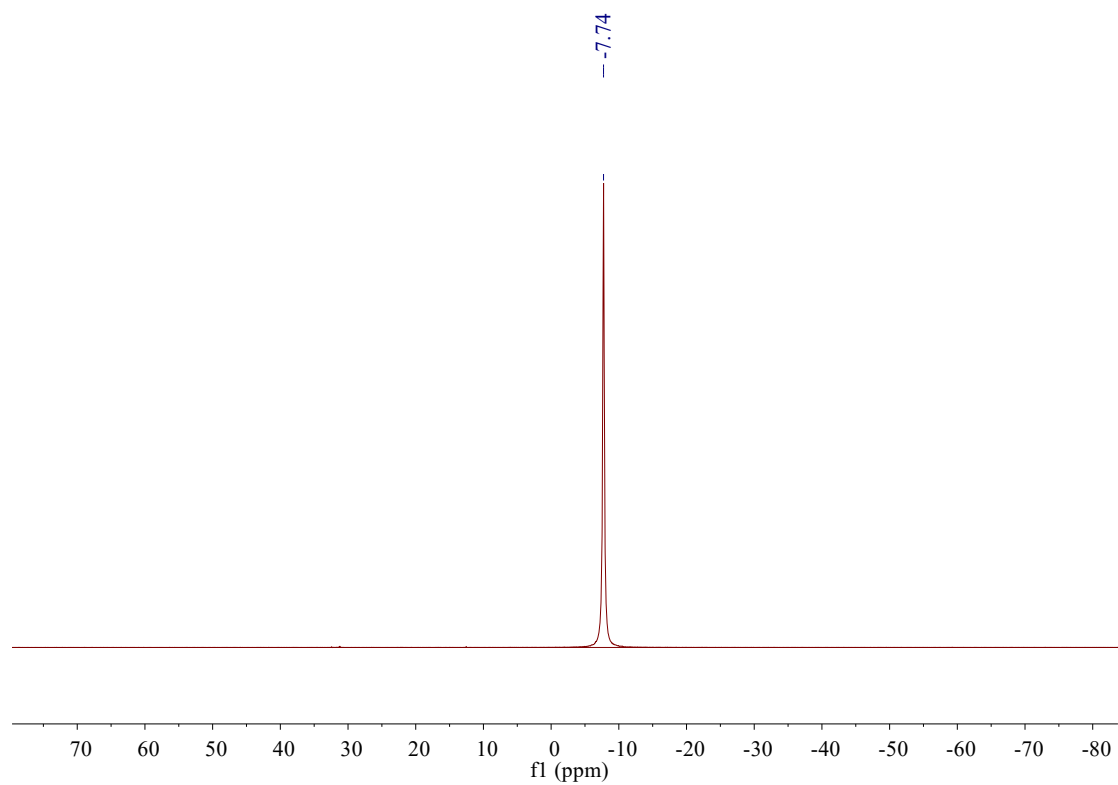

**Figure S23.**  $^{31}\text{P}$  NMR spectrum of **7** in  $\text{CDCl}_3$ .

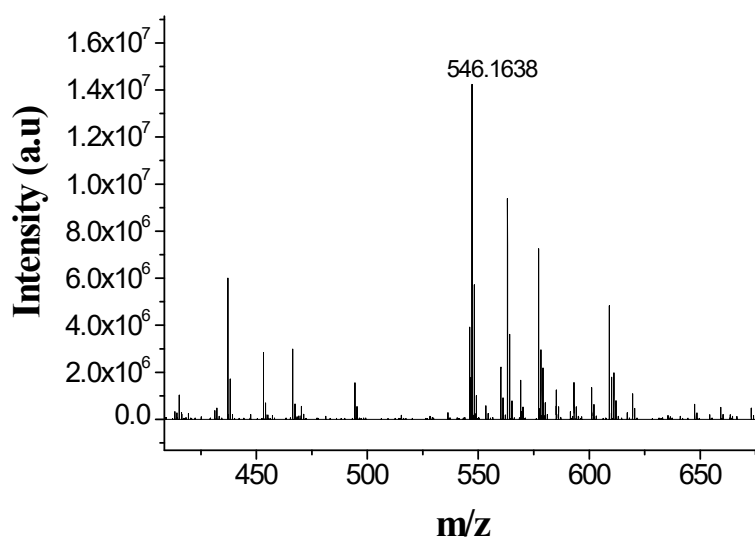

**Figure 24.** Mass spectrum of **L1**.

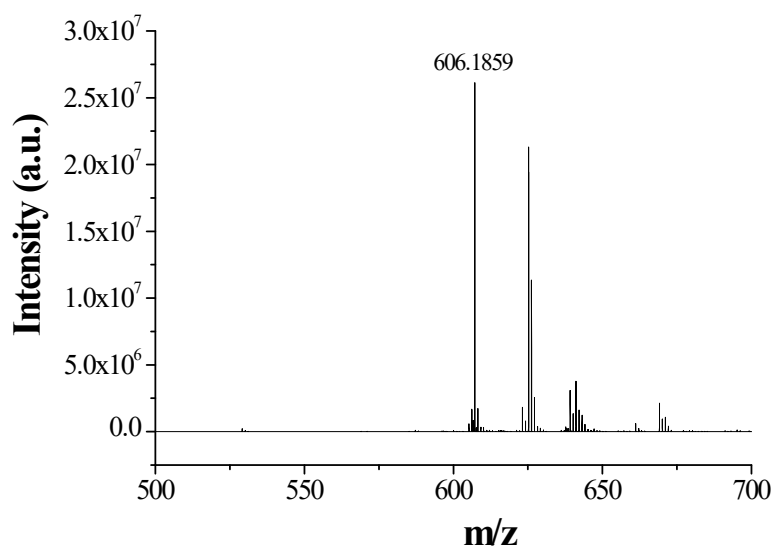

**Figure 25.** Mass spectrum of L2.

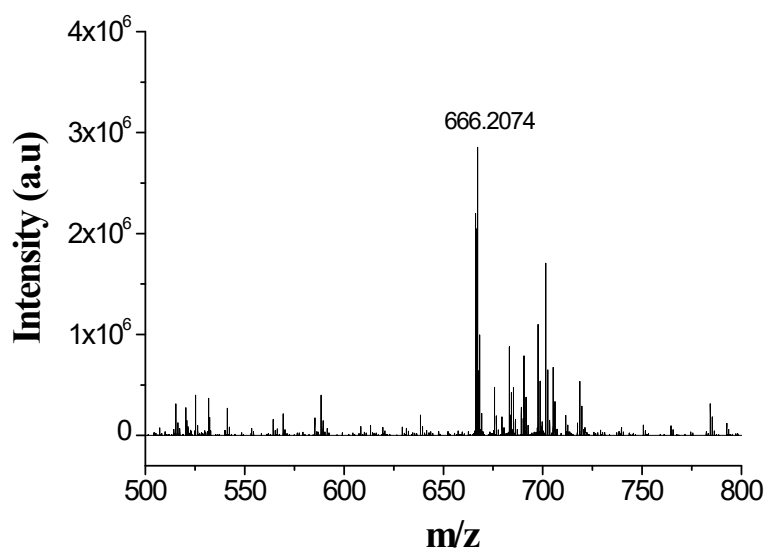

**Figure 26.** Mass spectrum of L3.

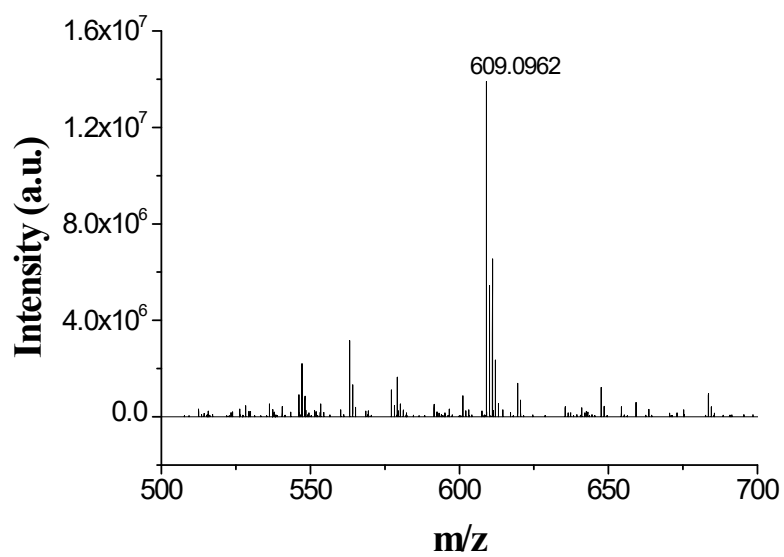

**Figure 27.** Mass spectrum of complex 1.

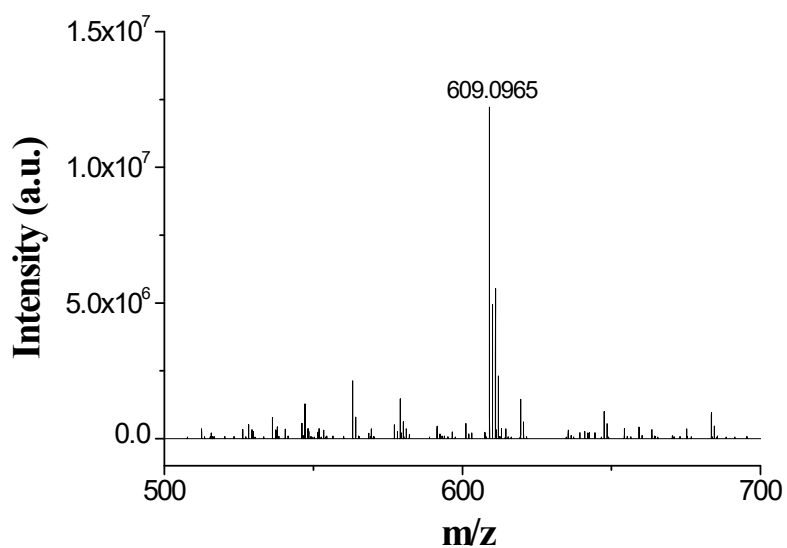

**Figure 28.** Mass spectrum of complex 2.

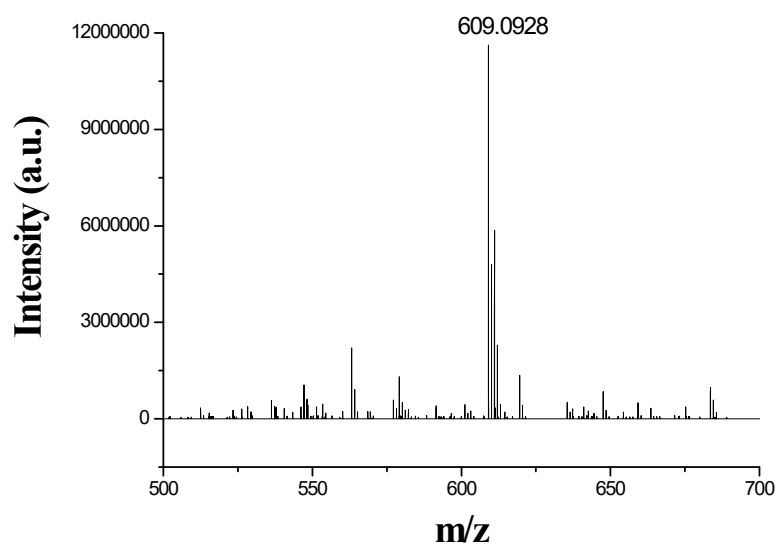

**Figure 29.** Mass spectrum of complex 3.

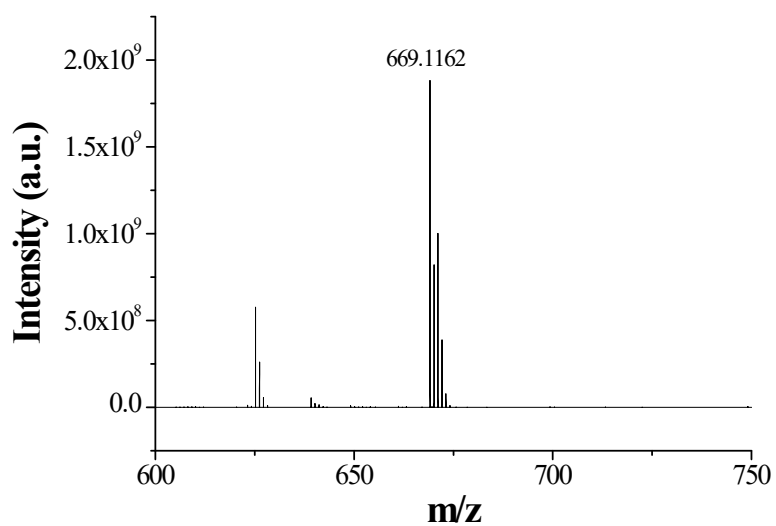

**Figure 30.** Mass spectrum of complex 4.

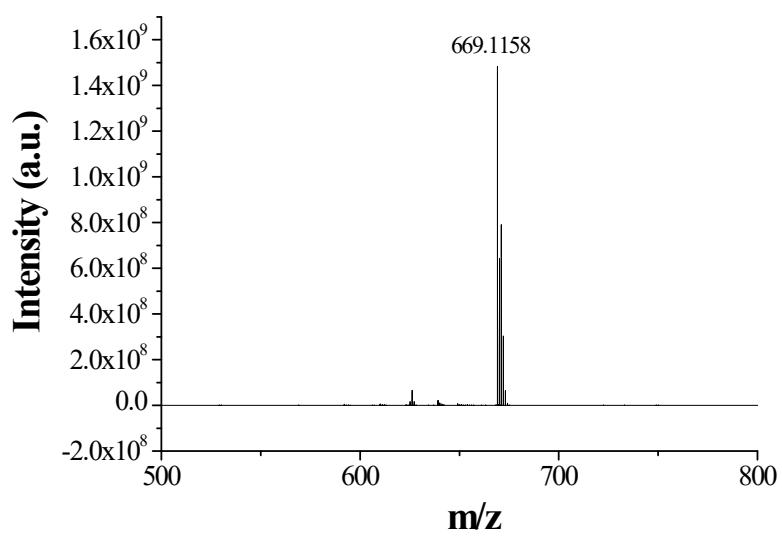

**Figure 31.** Mass spectrum of complex 5.

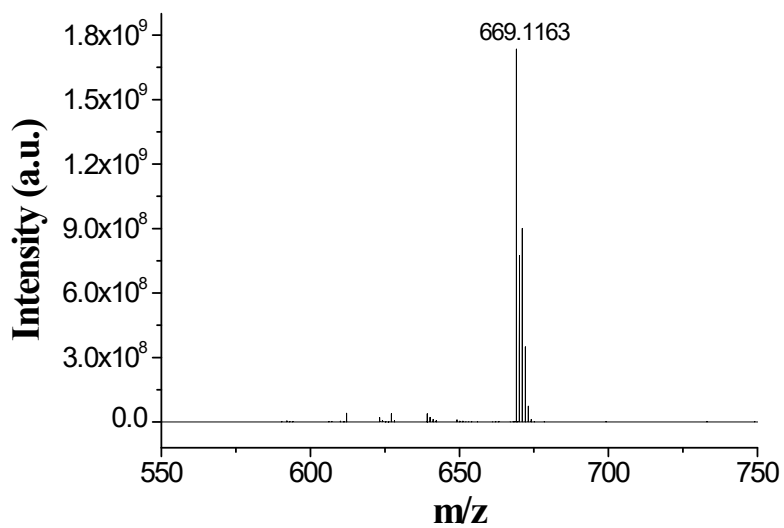

**Figure 32.** Mass spectrum of complex 6.

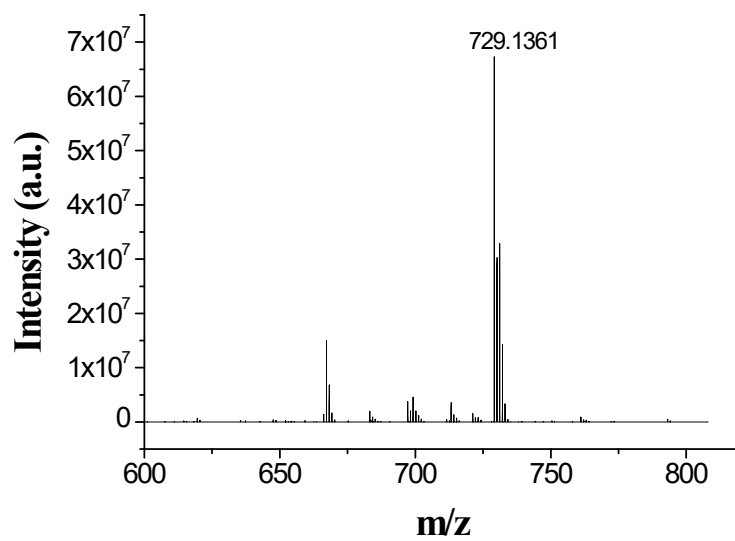

**Figure S33.** Mass spectrum of complex 7.

## 2. Molecular structures

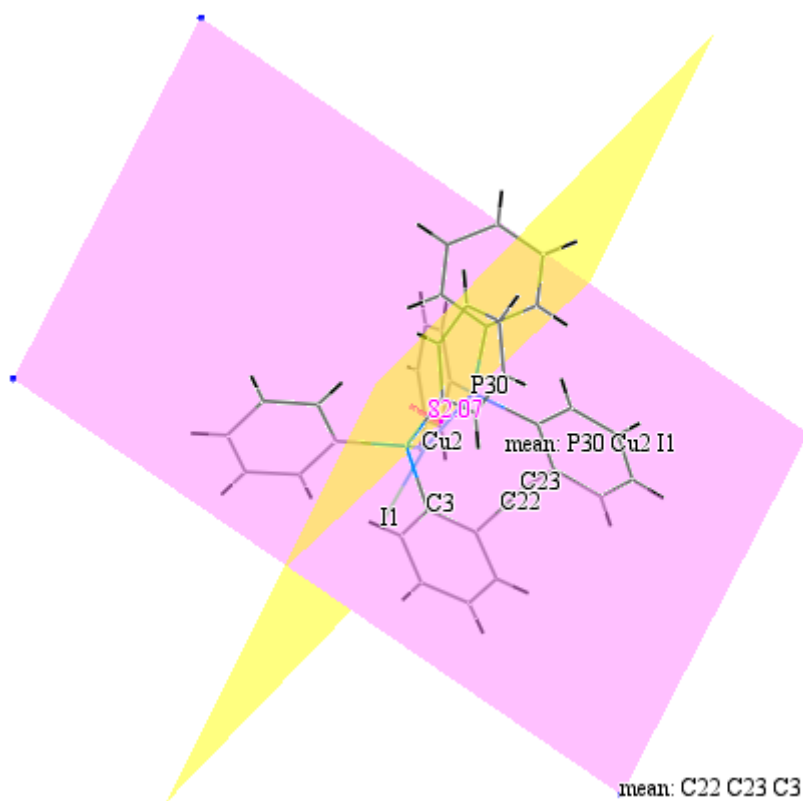

**Figure S34.** The dihedral angles between the Cu-X-P plane and the plane of C≡C and its connected phenyl ring in complex 1.

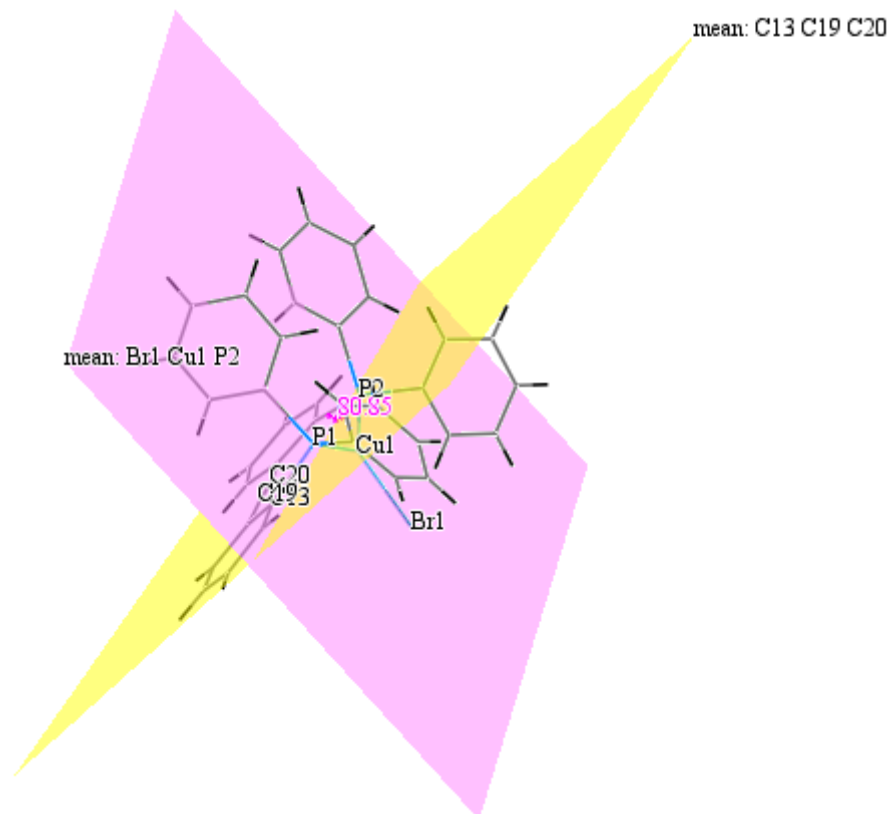

**Figure S35.** The dihedral angles between the Cu-X-P plane and the plane of C≡C and its connected phenyl ring in complex **2**.

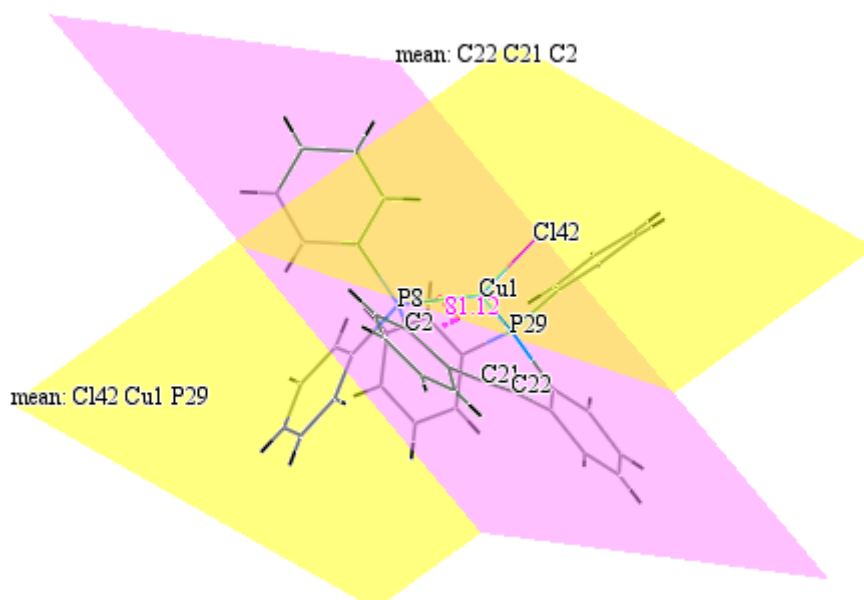

**Figure S36.** The dihedral angles between the Cu-X-P plane and the plane of C≡C and its connected phenyl ring in complex **3**.

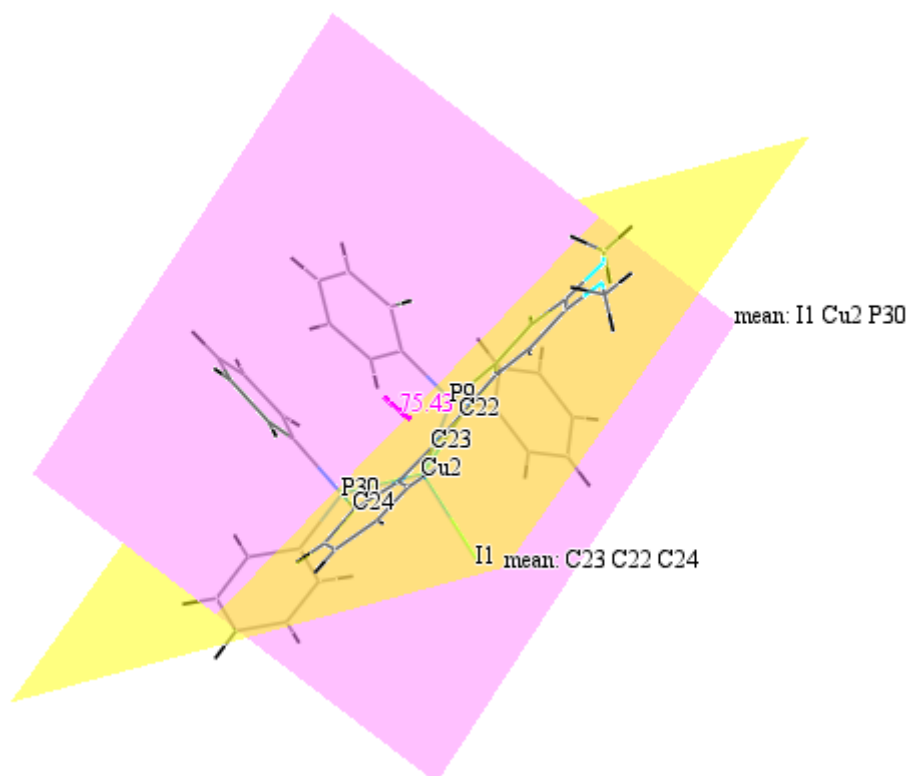

**Figure S37.** The dihedral angles between the Cu-X-P plane and the plane of C≡C and its connected phenyl ring in complex **4**.

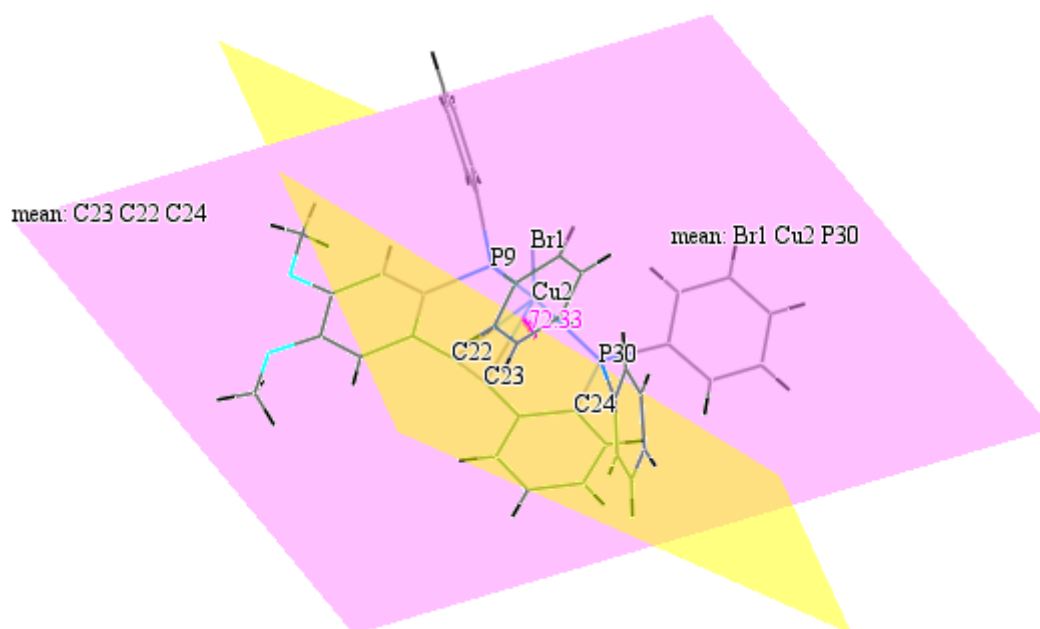

**Figure S38.** The dihedral angles between the Cu-X-P plane and the plane of C≡C and its connected phenyl ring in complex **5**.



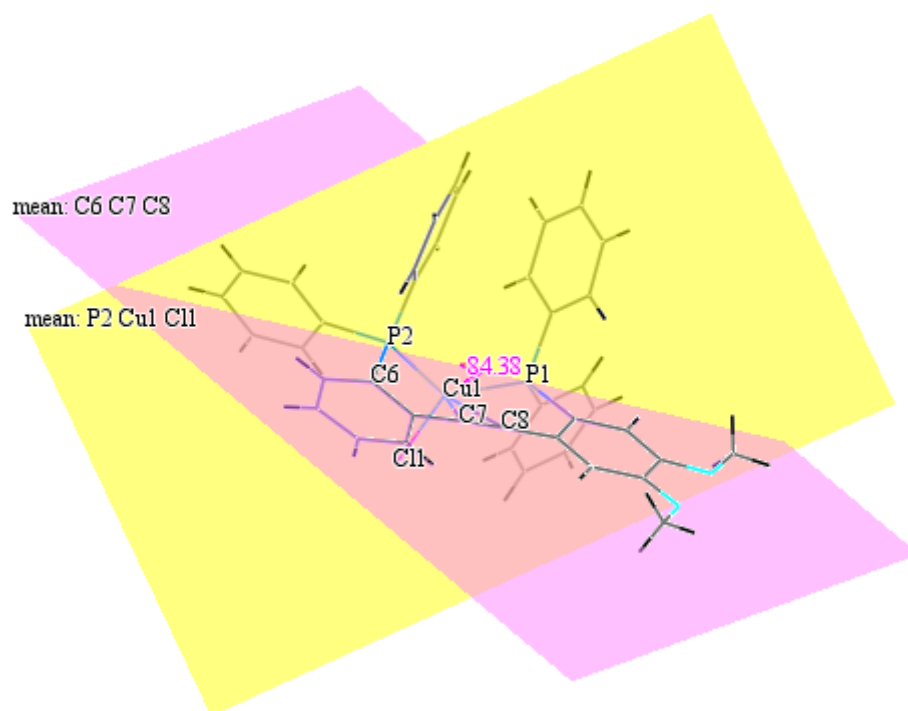

**Figure S39.** The dihedral angles between the Cu-X-P plane and the plane of C≡C and its connected phenyl ring in complex **6**.

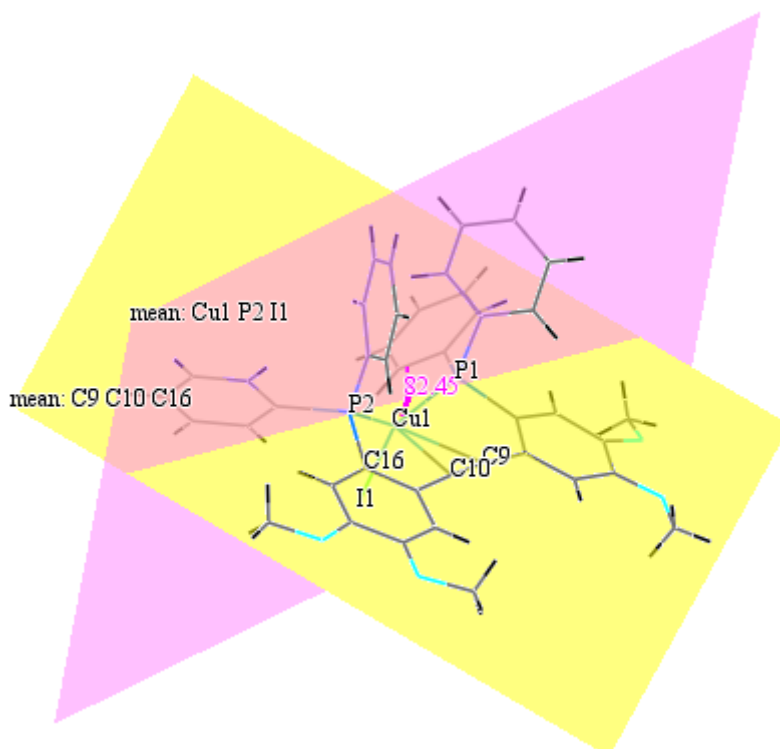

**Figure S40.** The dihedral angles between the Cu-X-P plane and the plane of C≡C and its connected phenyl ring in complex **7**.

### 3. Photophysical properties

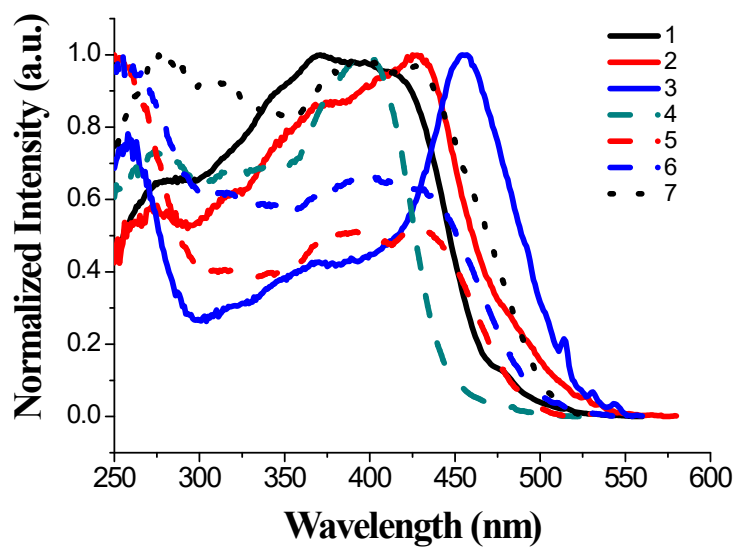

**Figure S41.** Normalized excitation spectra of **1-7** in solid state at 298 K ( $\lambda_{\text{em}} = 582$  nm for **1**,  $\lambda_{\text{em}} = 607$  nm for **2**,  $\lambda_{\text{em}} = 580$  nm for **3**,  $\lambda_{\text{em}} = 540$  nm for **4**,  $\lambda_{\text{em}} = 545$  nm for **5**,  $\lambda_{\text{em}} = 574$  nm for **6**,  $\lambda_{\text{em}} = 550$  nm for **7**).

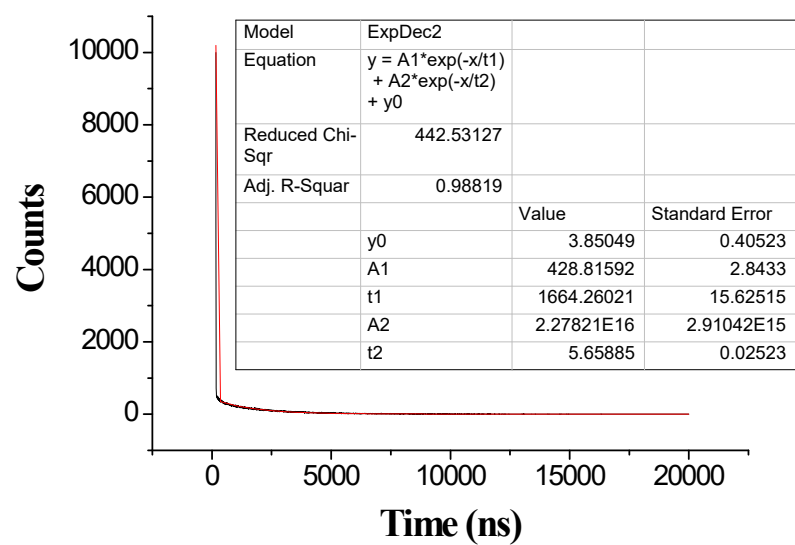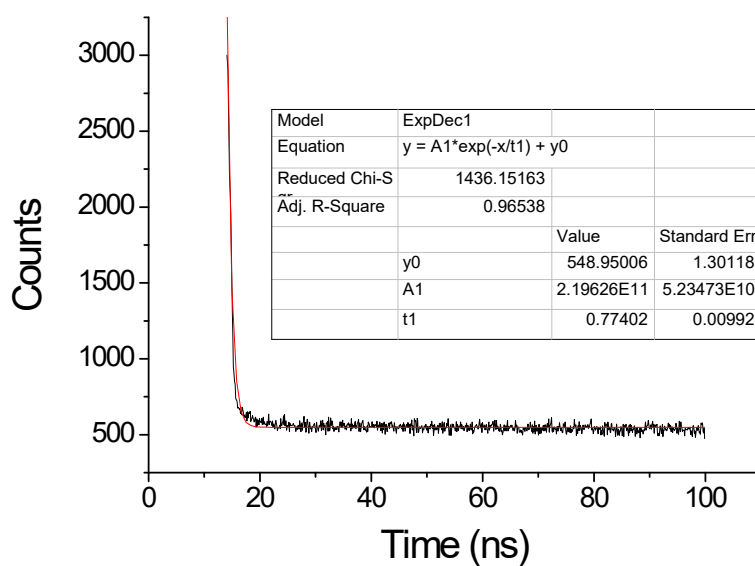

**Figure S42.** Time profiles of luminescence decay and exponential fit spectrum of **1** at 297 K ( $\lambda_{em} = 582$  nm (up) and  $\lambda_{em} = 753$  nm (down)).

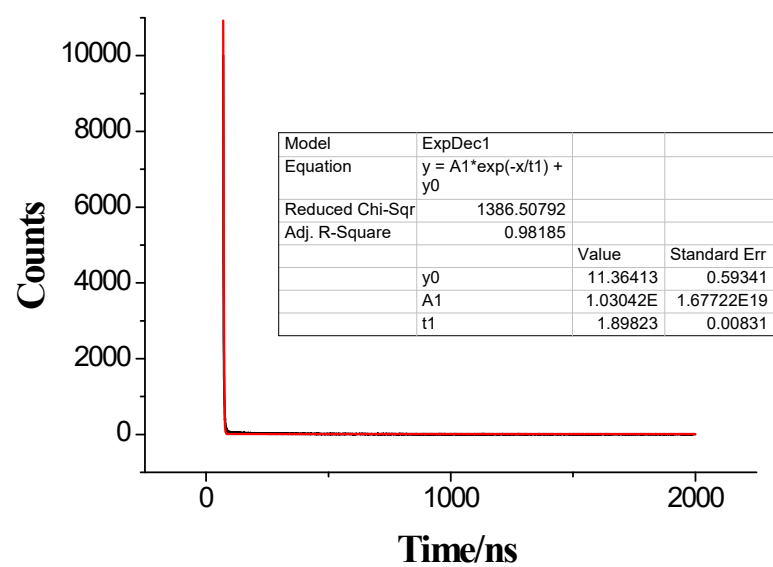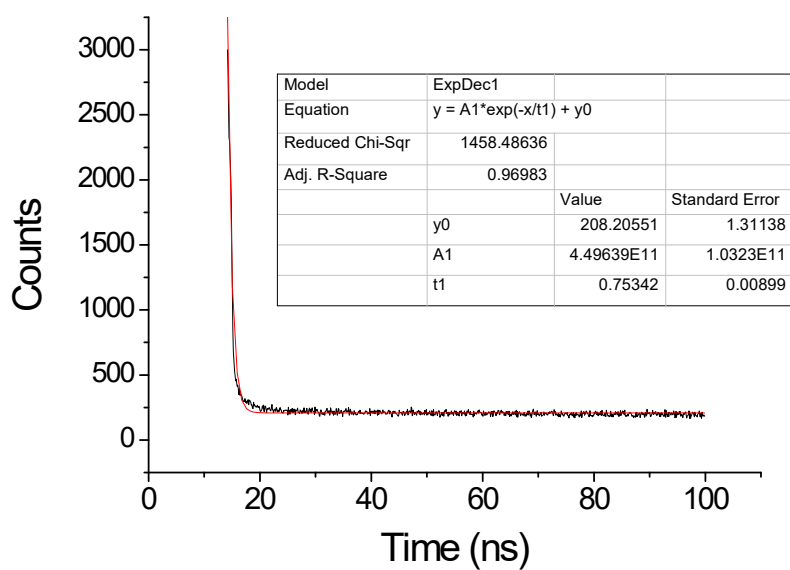

**Figure S43.** Time profiles of luminescence decay and exponential fit spectrum of **2** at 297 K ( $\lambda_{em} = 607$  nm (up) and  $\lambda_{em} = 694$  nm (down)).

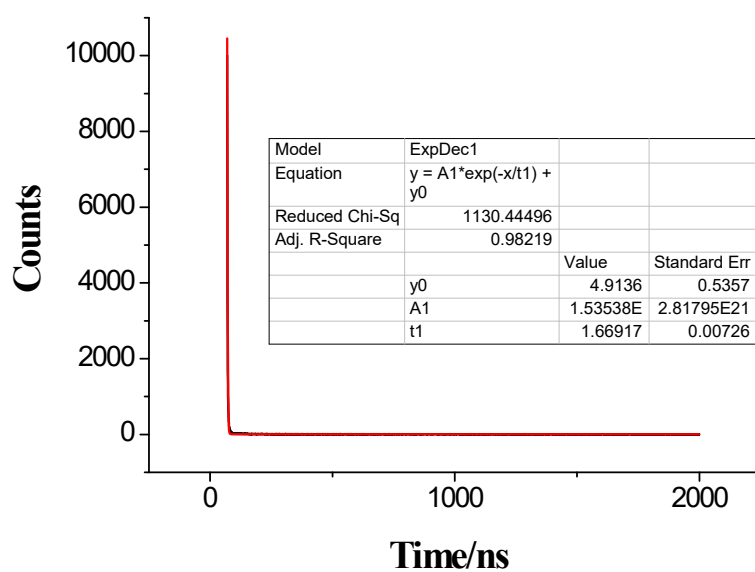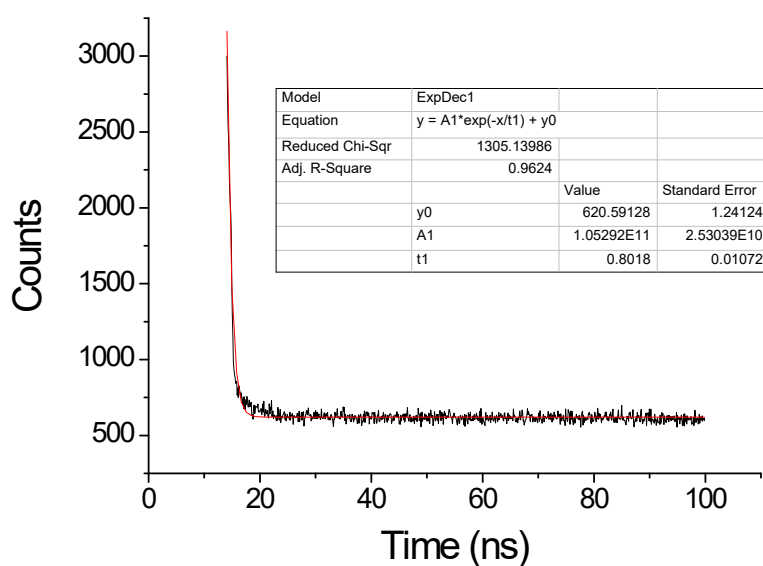

**Figure S44.** Time profiles of luminescence decay and exponential fit spectrum of **3** at 297 K ( $\lambda_{em} = 572$  nm (up) and  $\lambda_{em} = 685$  nm (down)).

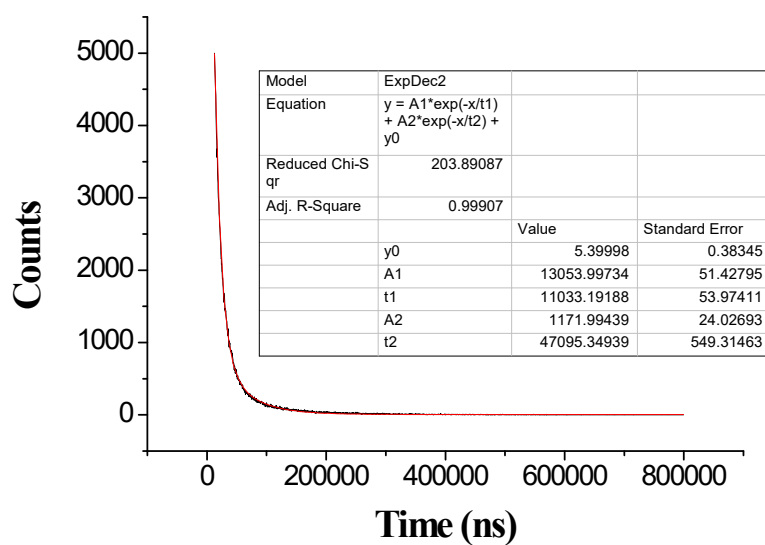

**Figure S45.** Time profiles of luminescence decay and exponential fit spectrum of **4** at 297 K ( $\lambda_{em} = 540$  nm).

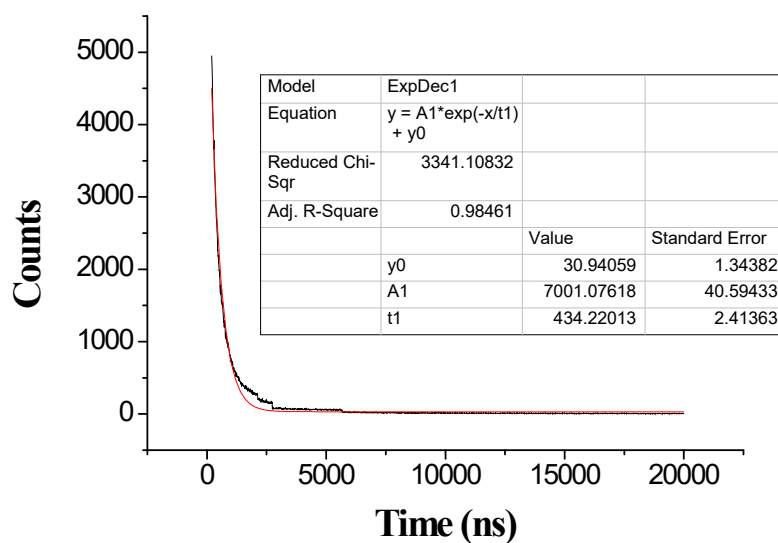

**Figure S46.** Time profiles of luminescence decay and exponential fit spectrum of **5** at 297 K ( $\lambda_{em} = 545$  nm).

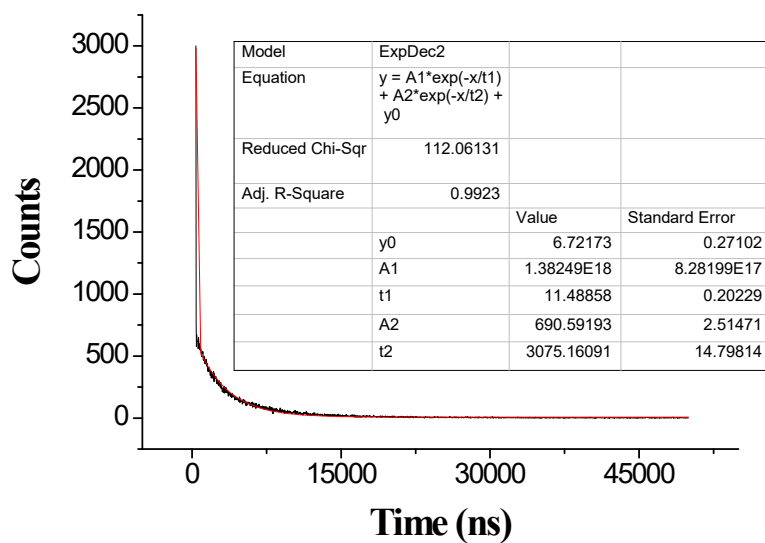

**Figure S47.** Time profiles of luminescence decay and exponential fit spectrum of **6** at 297 K ( $\lambda_{em} = 574$  nm).

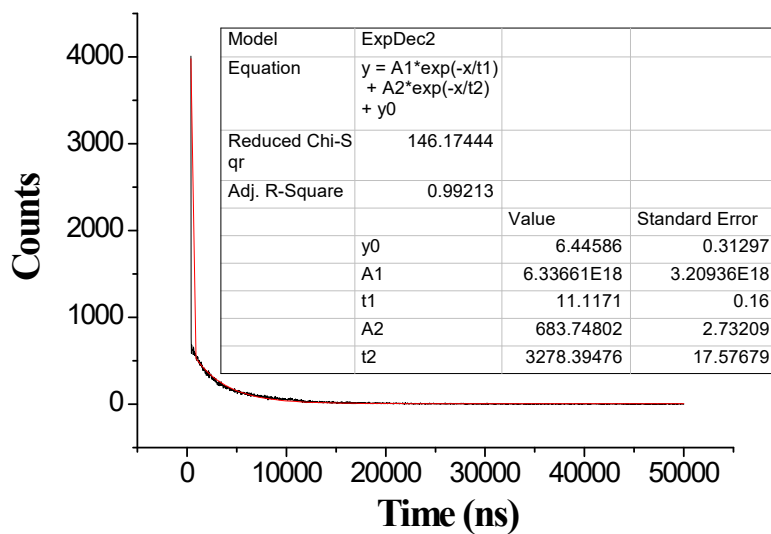

**Figure S48.** Time profiles of luminescence decay and exponential fit spectrum of **7** at 297 K ( $\lambda_{em} = 550$  nm).

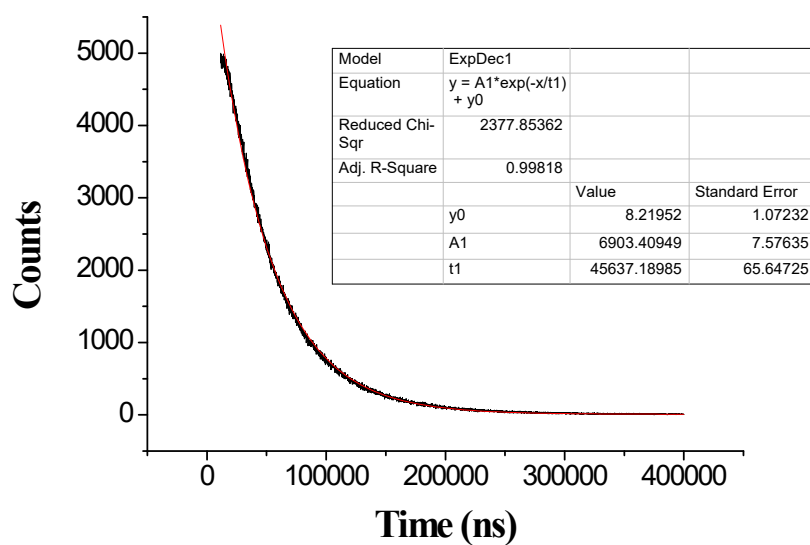

**Figure S49.** Time profiles of luminescence decay and exponential fit spectrum of **1** at 77 K ( $\lambda_{em} = 517$  nm).

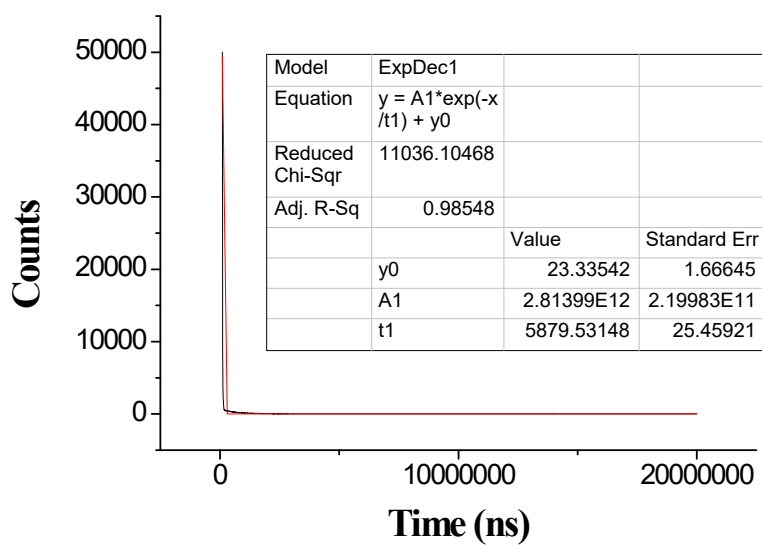

**Figure S50.** Time profiles of luminescence decay and exponential fit spectrum of **2** at 77 K ( $\lambda_{em} = 510$  nm).



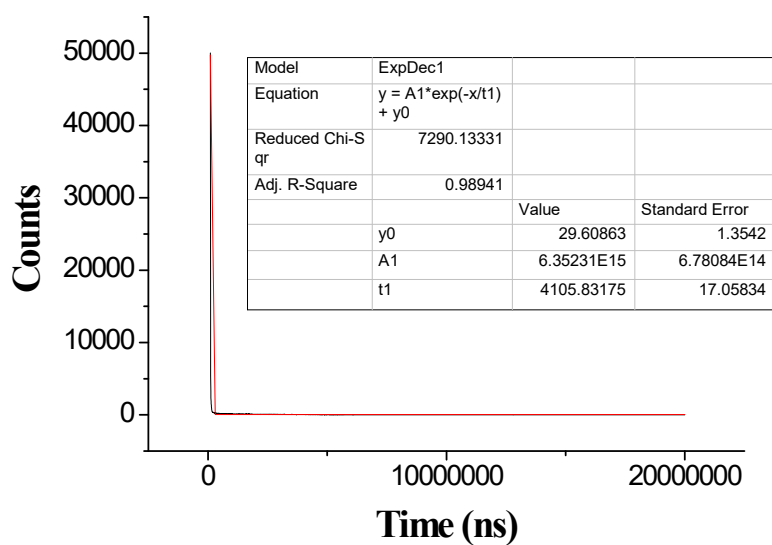

**Figure S51.** Time profiles of luminescence decay and exponential fit spectrum of **3** at 77 K ( $\lambda_{em} = 580$  nm).

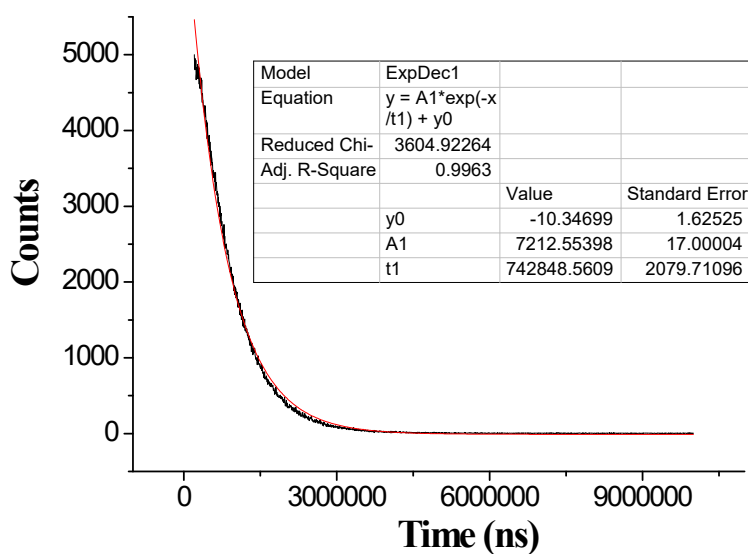

**Figure S52.** Time profiles of luminescence decay and exponential fit spectrum of **4** at 77 K ( $\lambda_{em} = 538$  nm).

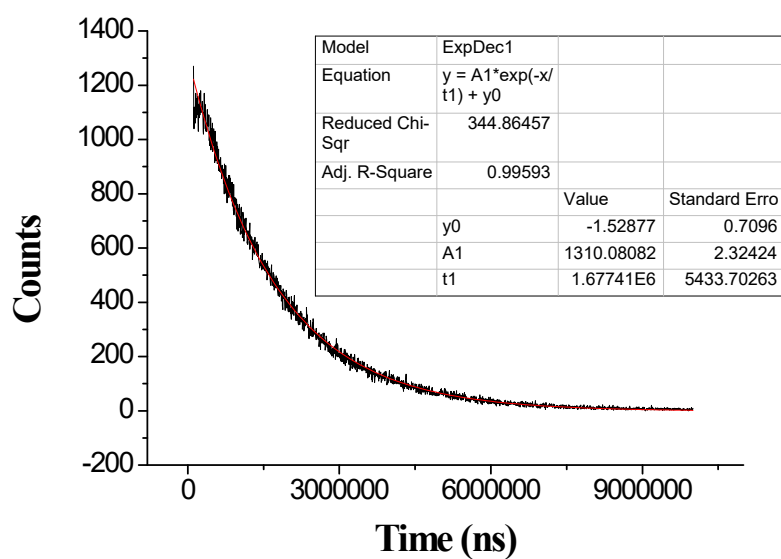

**Figure S53.** Time profiles of luminescence decay and exponential fit spectrum of 5 at 77 K ( $\lambda_{em} = 537$  nm).

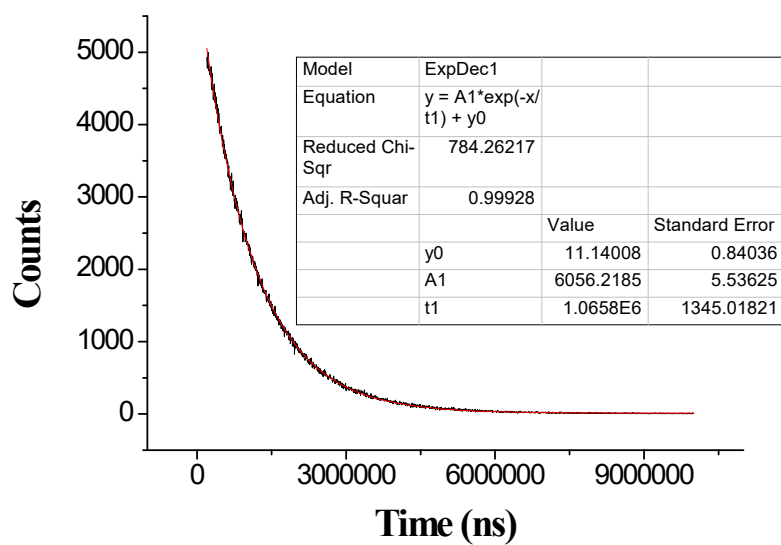

**Figure S54.** Time profiles of luminescence decay and exponential fit spectrum of 6 at 77 K ( $\lambda_{em} = 543$  nm).

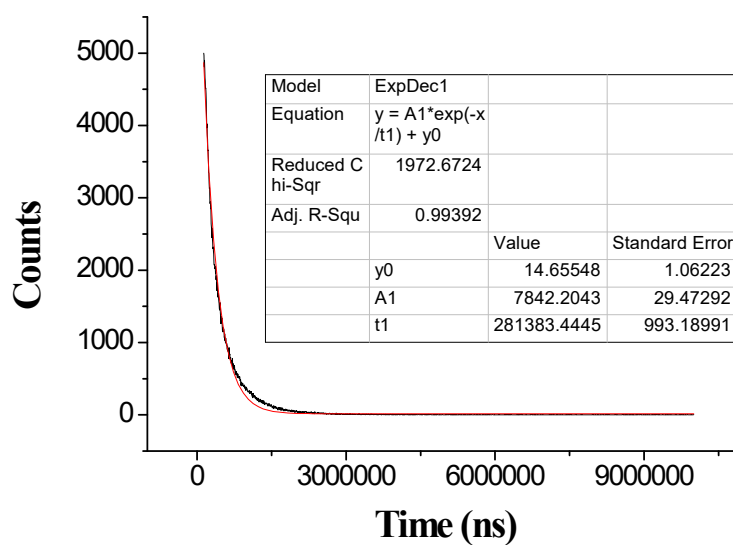

**Figure S55.** Time profiles of luminescence decay and exponential fit spectrum of **7** at 77 K ( $\lambda_{em} = 556$  nm).

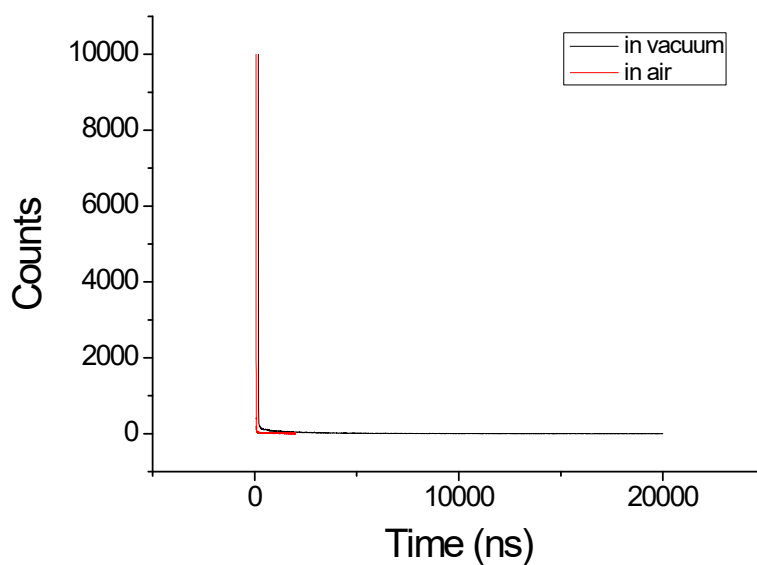

**Figure S56.** Luminescence decay of **2** at 298 K in air and under vacuum ( $\lambda_{em} = 607$  nm).

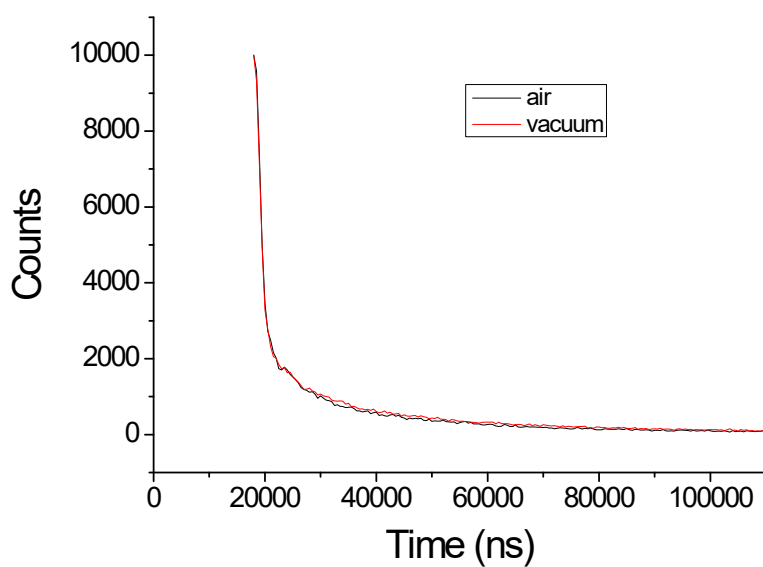

**Figure S57.** Luminescence decay of **4** at 298 K in air and under vacuum ( $\lambda_{em} = 540$  nm).

#### 4. Computational details

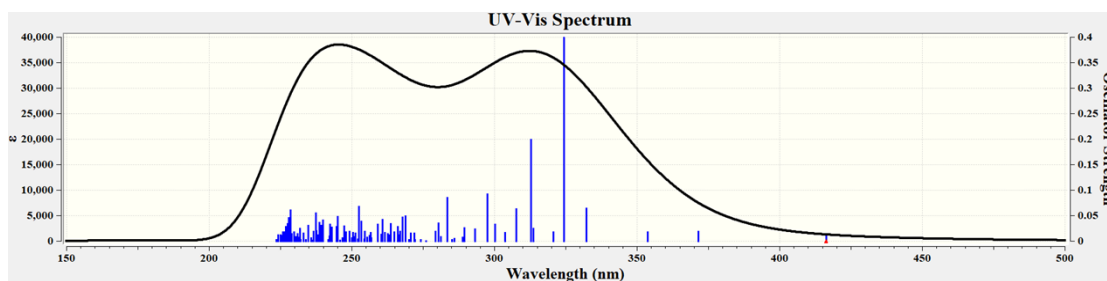

**Figure S58.** The absorption spectrum of complex **1** in  $\text{CH}_2\text{Cl}_2$ .

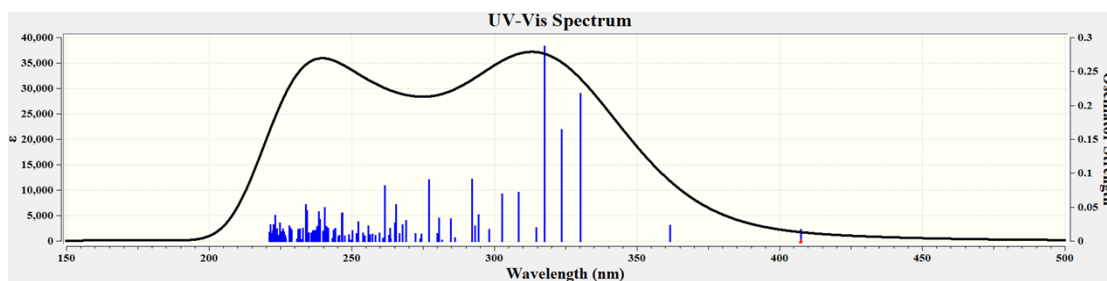

**Figure S59.** The absorption spectrum of complex **2** in  $\text{CH}_2\text{Cl}_2$ .

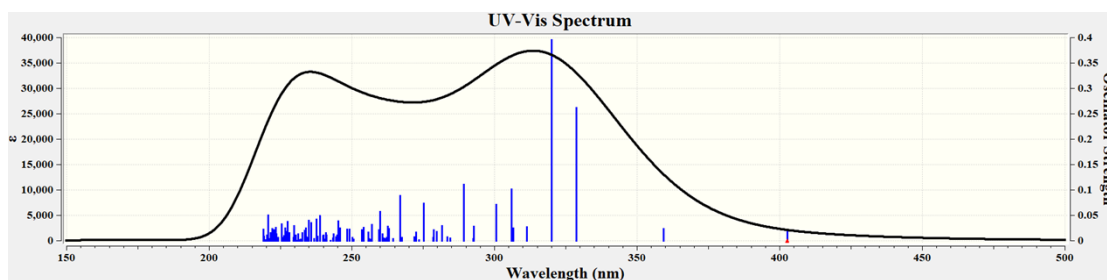

**Figure S60.** The absorption spectrum of complex **3** in CH<sub>2</sub>Cl<sub>2</sub>.

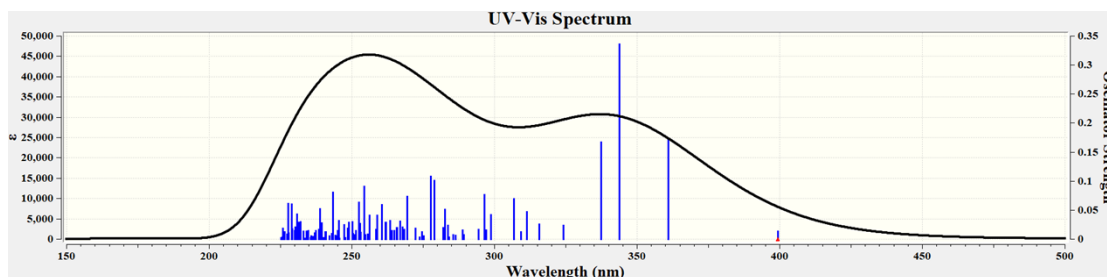

**Figure S61.** The absorption spectrum of complex **4** in CH<sub>2</sub>Cl<sub>2</sub>.

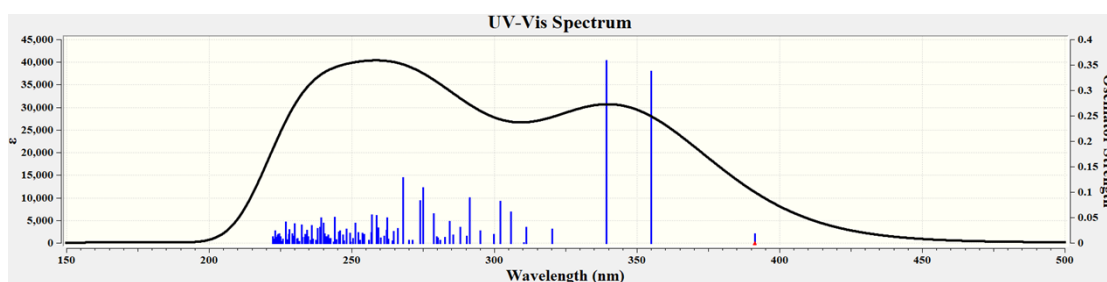

**Figure S62.** The absorption spectrum of complex **5** in CH<sub>2</sub>Cl<sub>2</sub>.

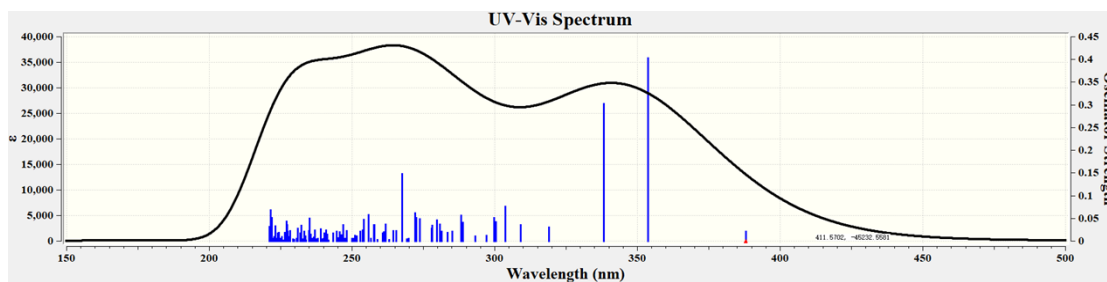

**Figure S63.** The absorption spectrum of complex **6** in CH<sub>2</sub>Cl<sub>2</sub>.

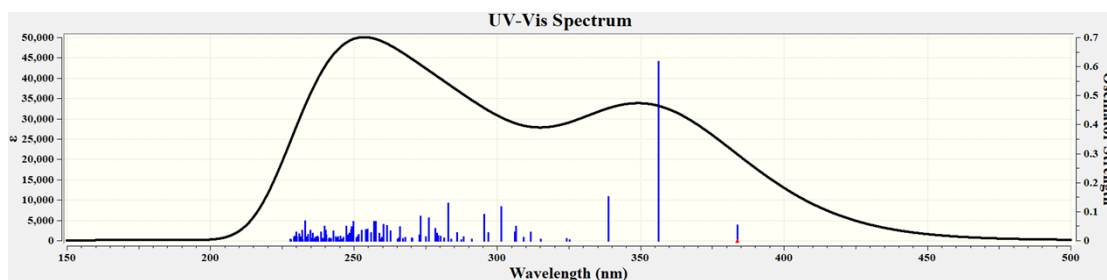

**Figure S64.** The absorption spectrum of complex **7** in CH<sub>2</sub>Cl<sub>2</sub>.

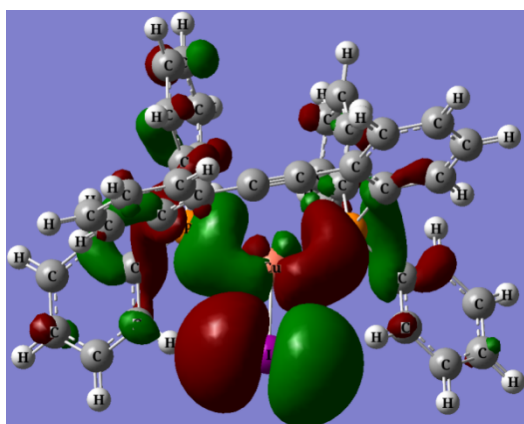

HOMO

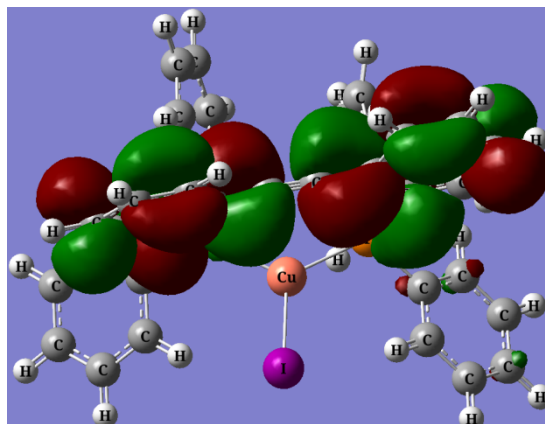

LUMO

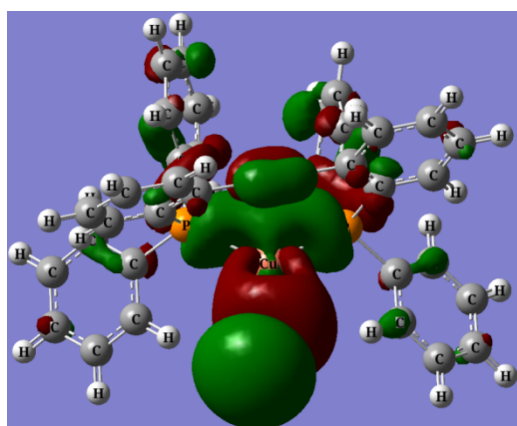

HOMO-1

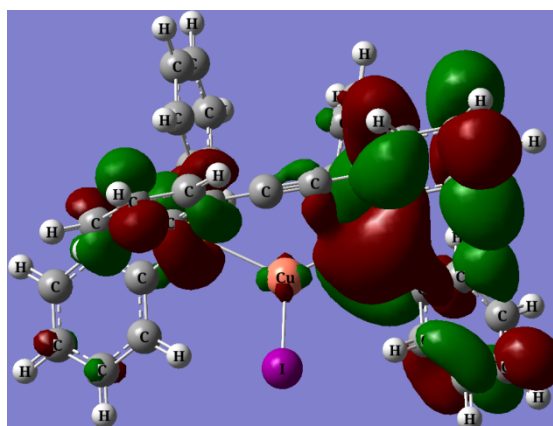

LUMO+1

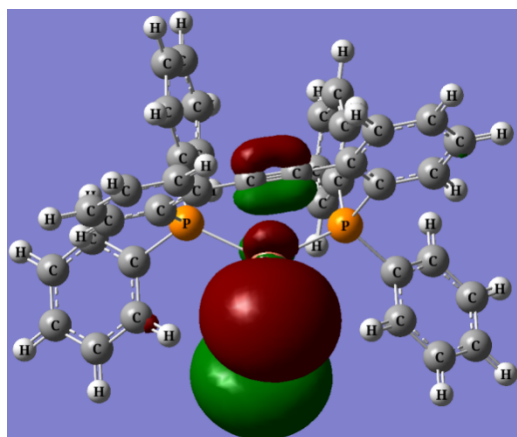

HOMO-2

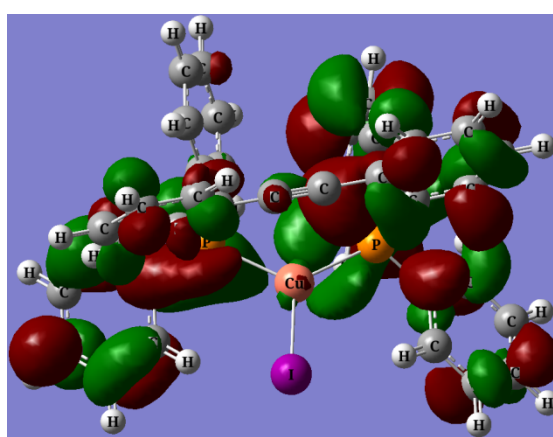

LUMO+2

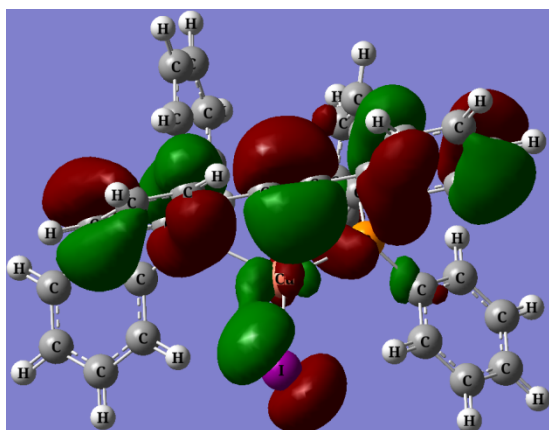

HOMO-3

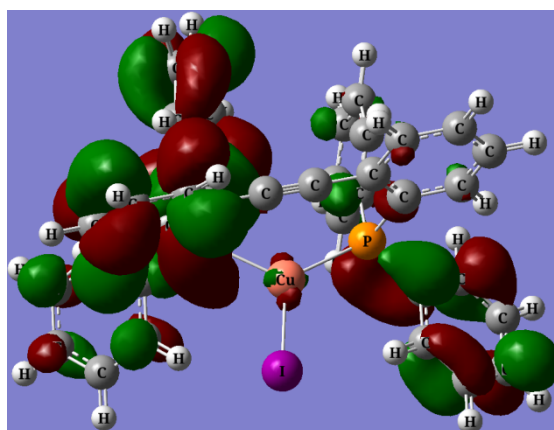

LUMO+3

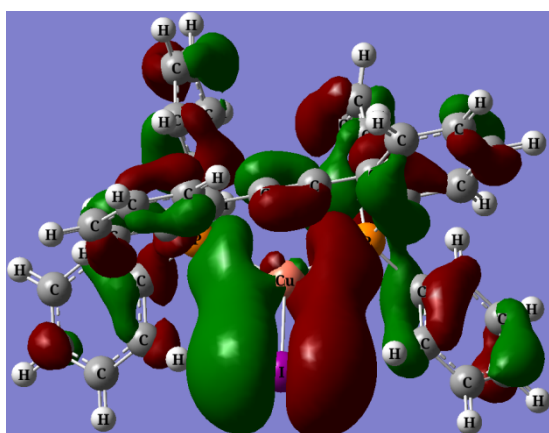

HOMO-4

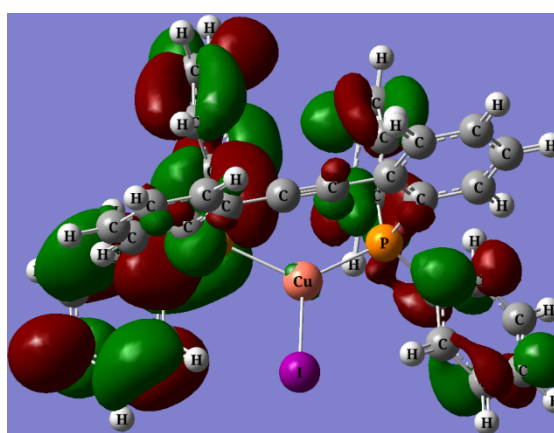

LUMO+4

1

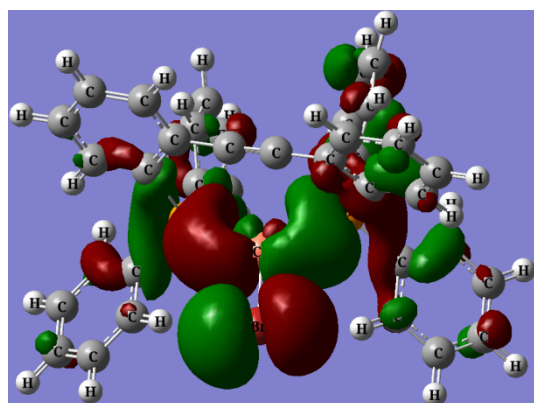

HOMO

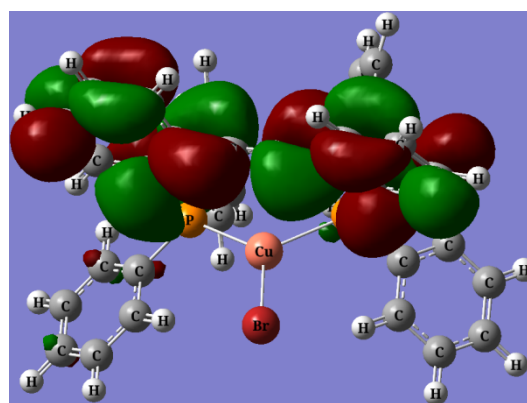

LUMO

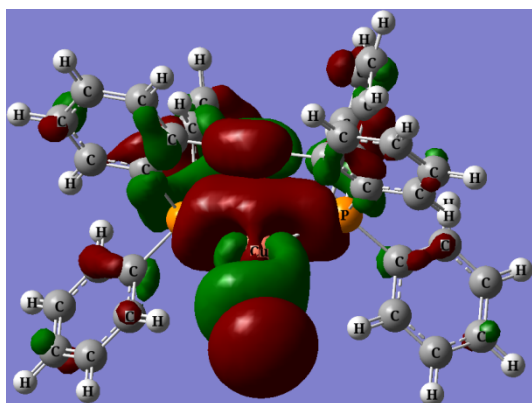

HOMO-1

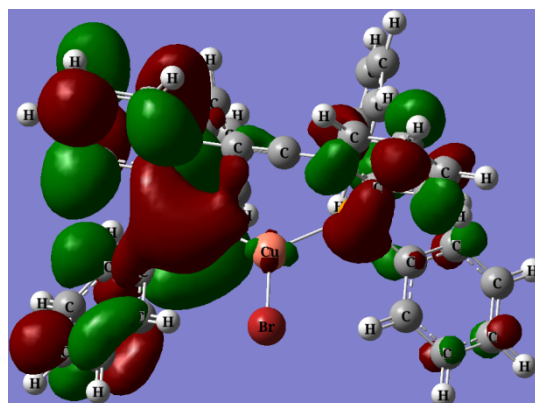

LUMO+1

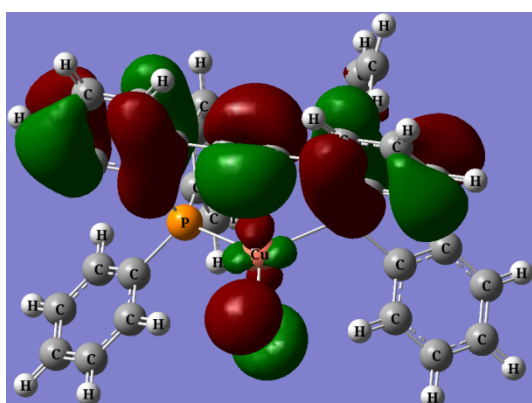

HOMO-2

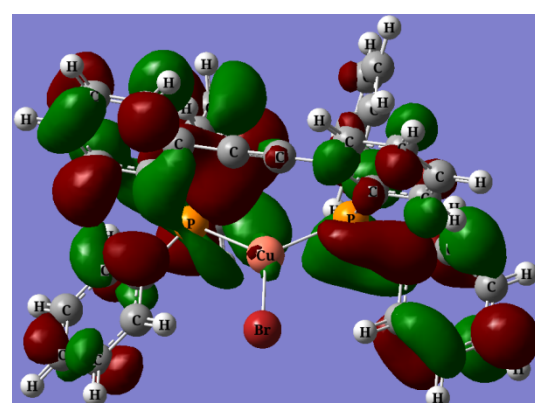

LUMO+2

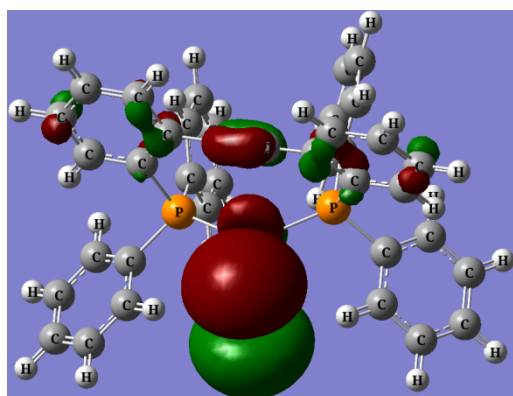

HOMO-3

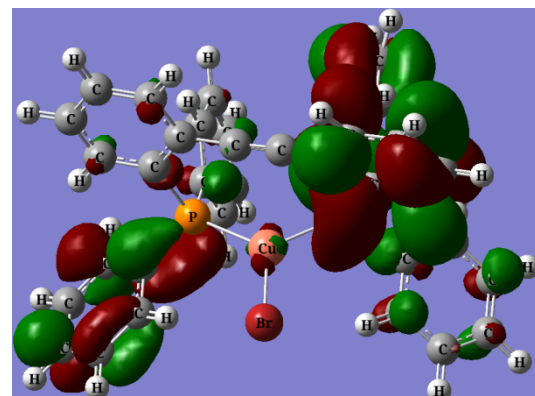

LUMO+3



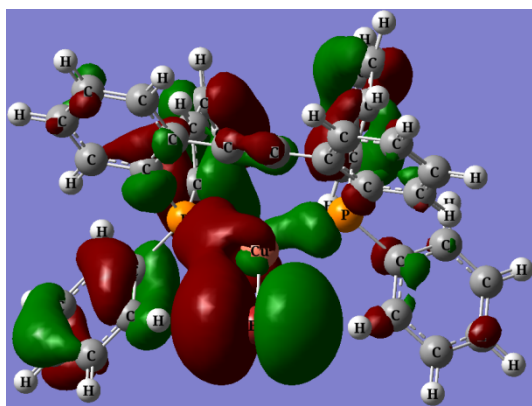

HOMO-4

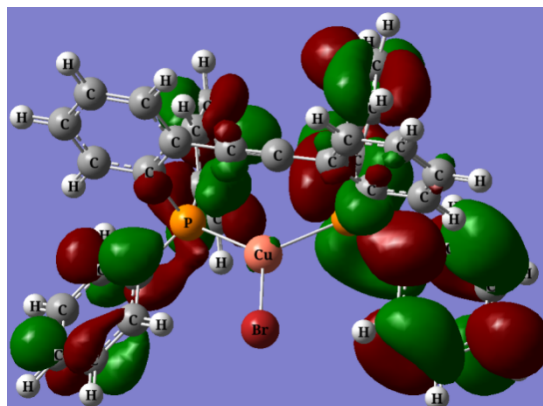

LUMO+4

2

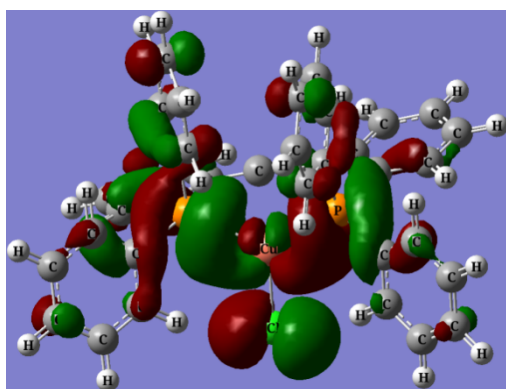

HOMO

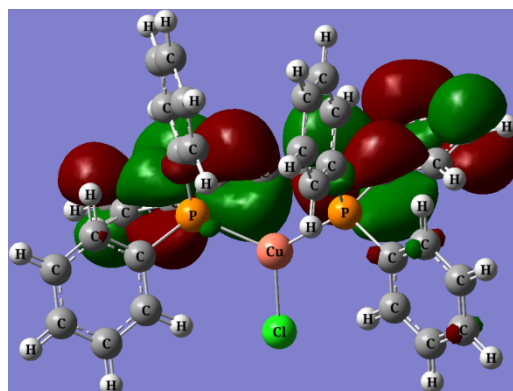

LUMO

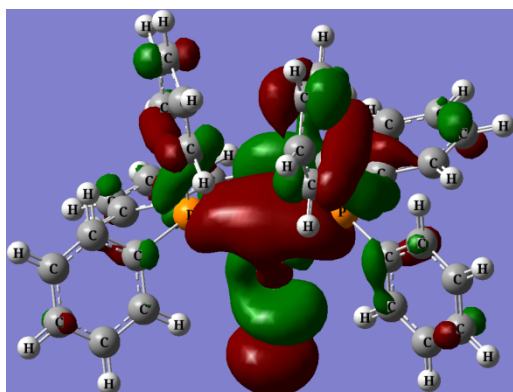

HOMO-1

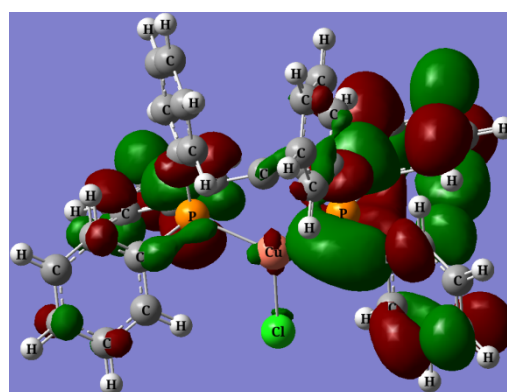

LUMO+1

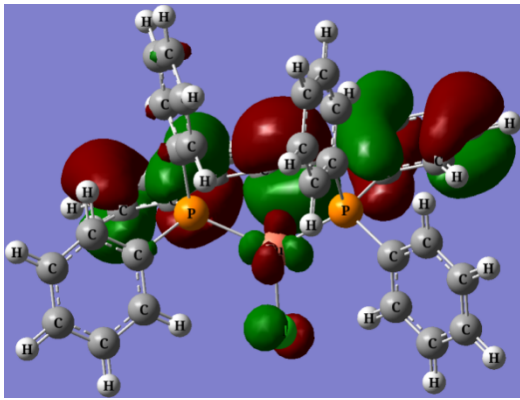

HOMO-2

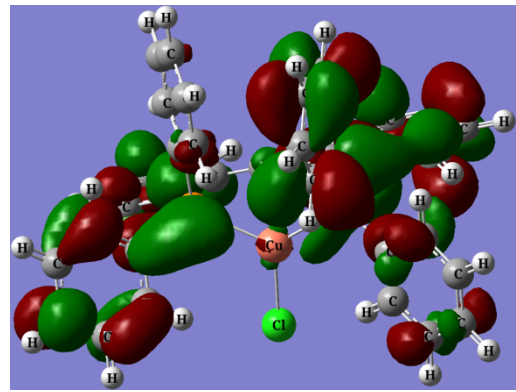

LUMO+2

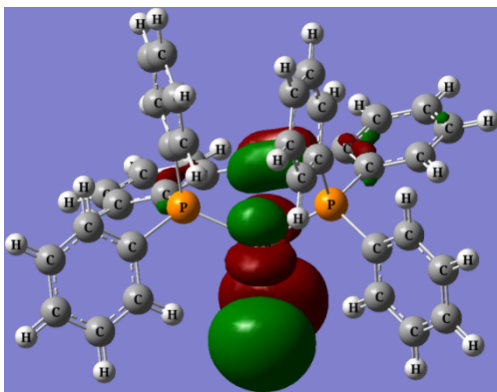

HOMO-3

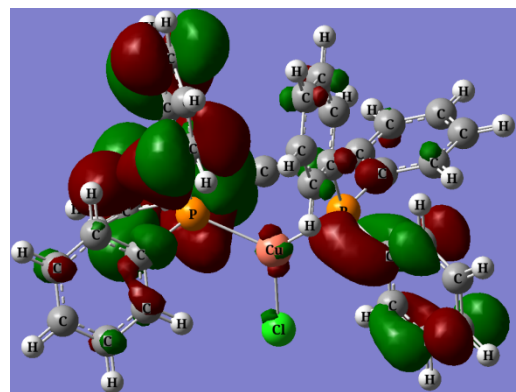

LUMO+3

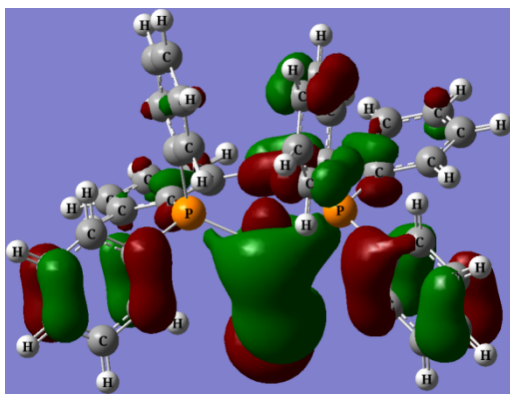

HOMO-4

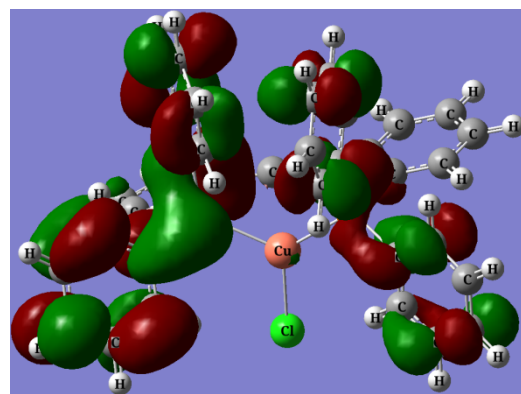

LUMO+4

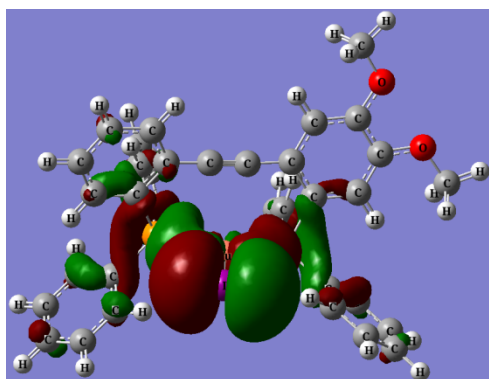

HOMO

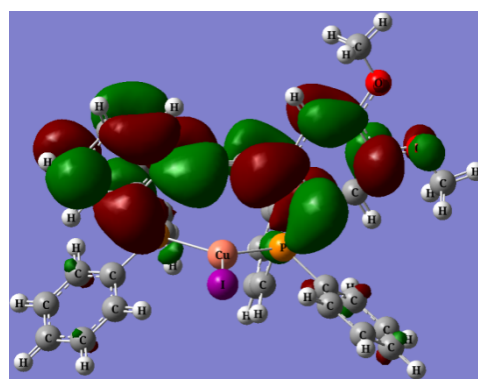

LUMO

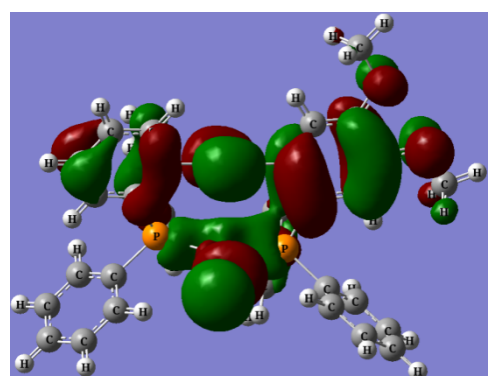

HOMO-1

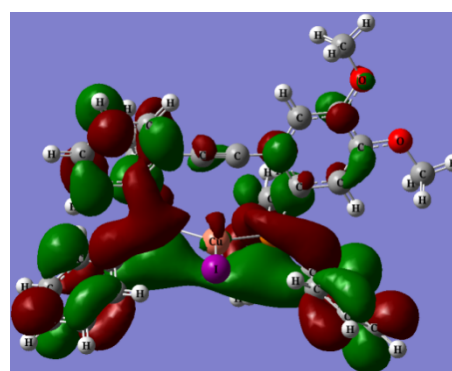

LUMO+1

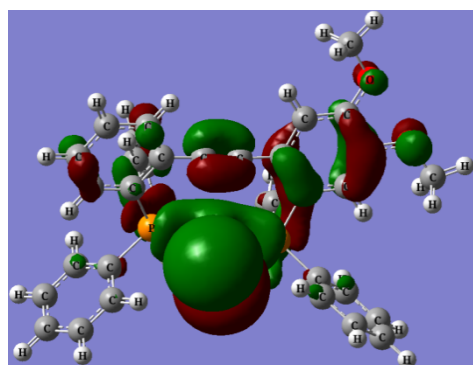

HOMO-2

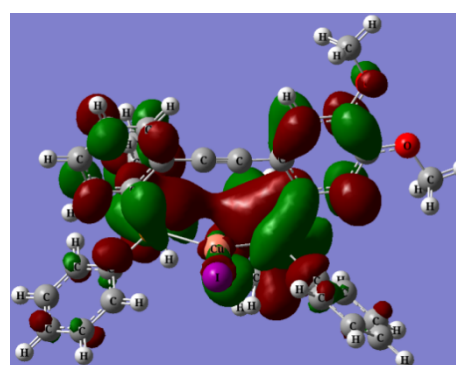

LUMO+2

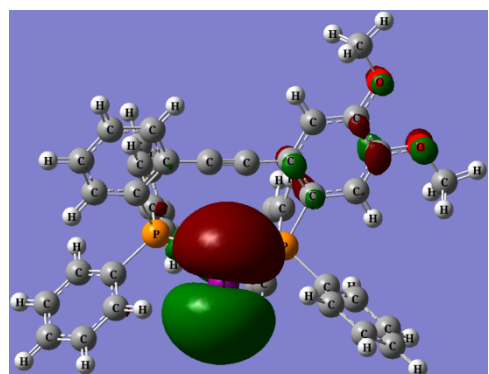

HOMO-3

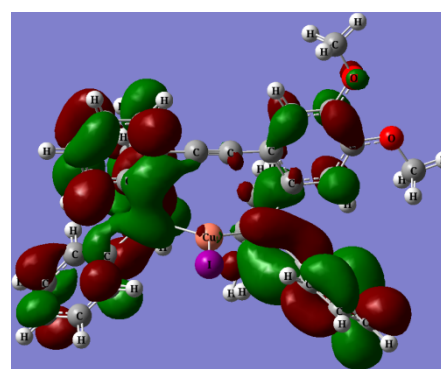

LUMO+3

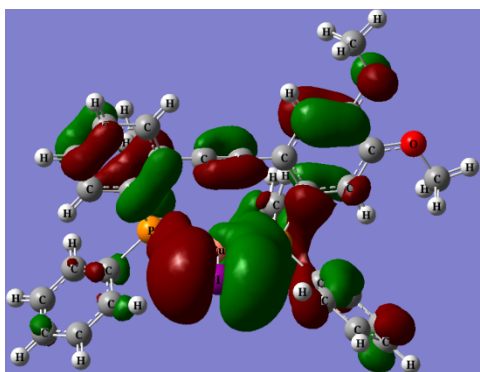

HOMO-4

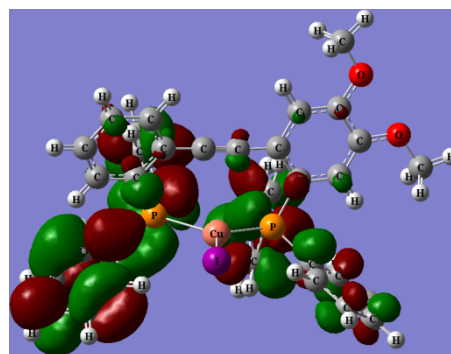

LUMO+4

4

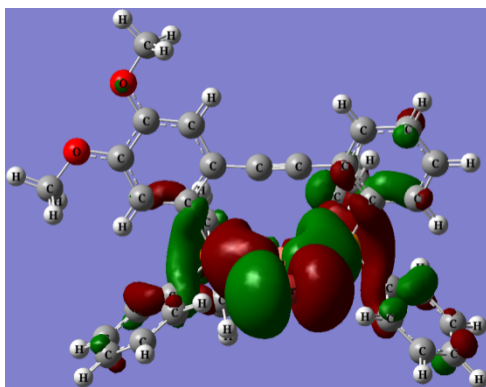

HOMO

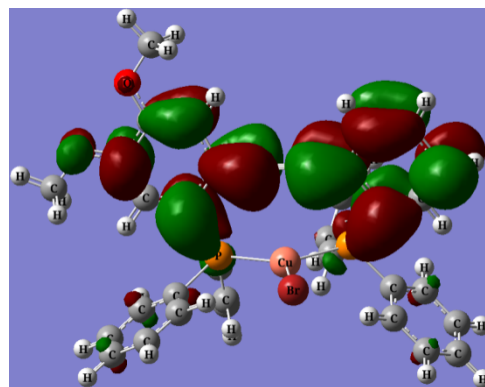

LUMO

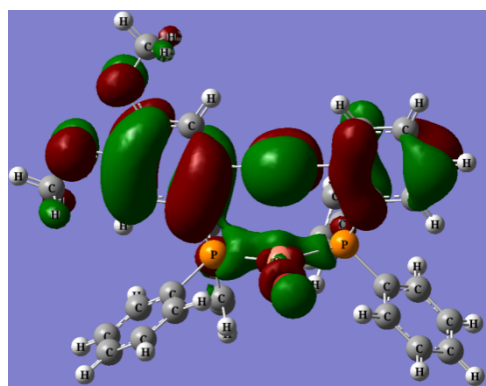

HOMO-1

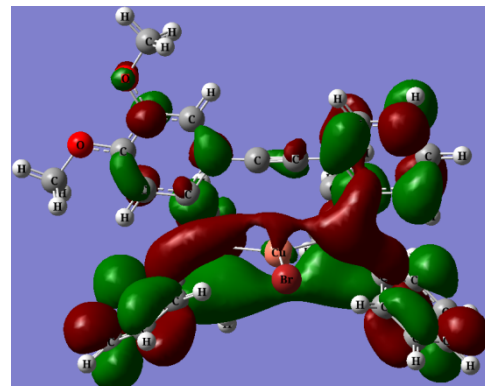

LUMO+1

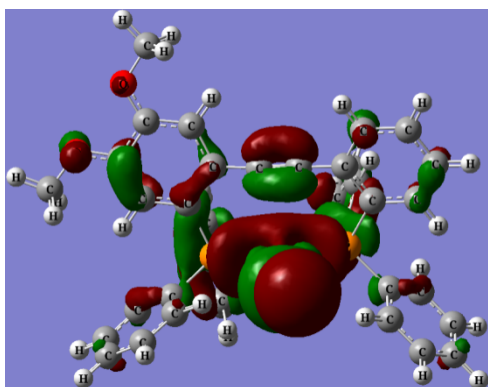

HOMO-2

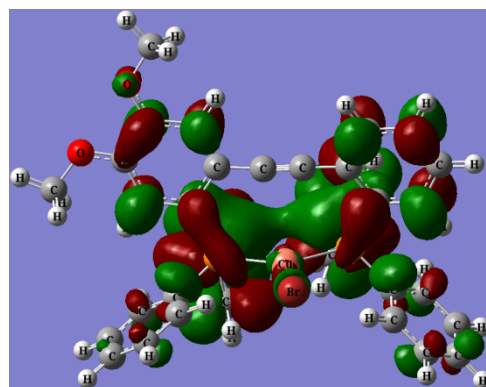

LUMO+2

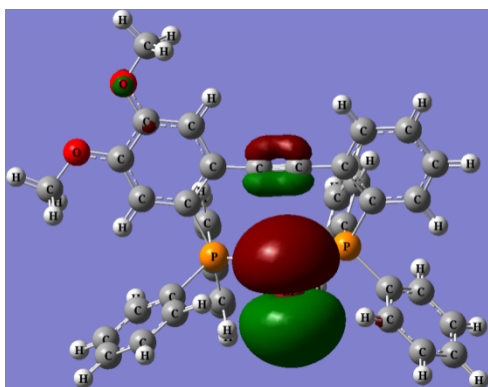

HOMO-3

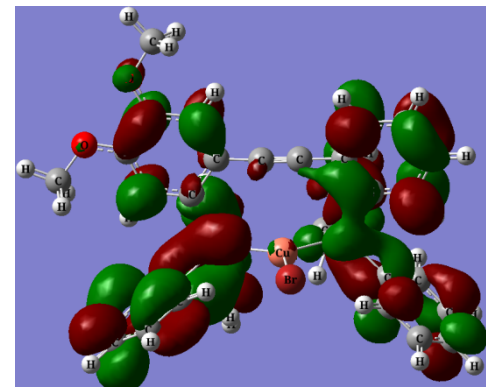

LUMO+3

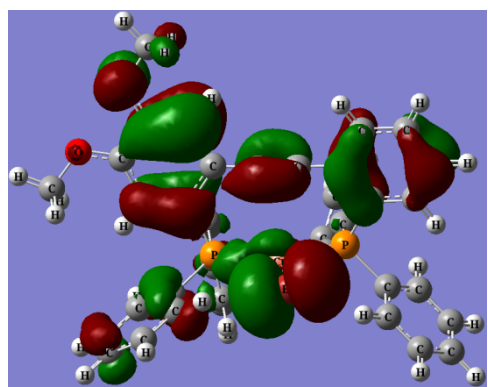

HOMO-4

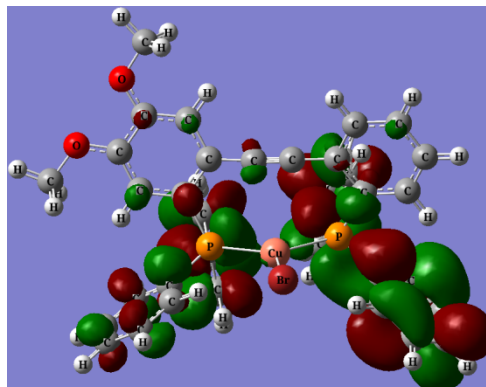

LUMO+4

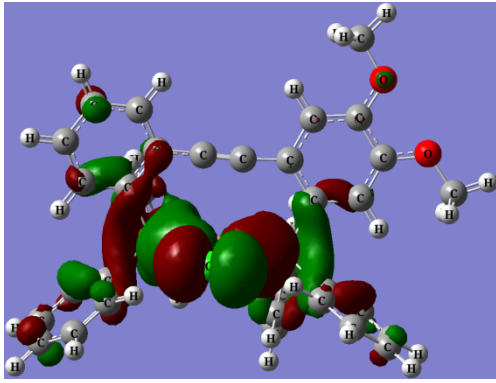

HOMO

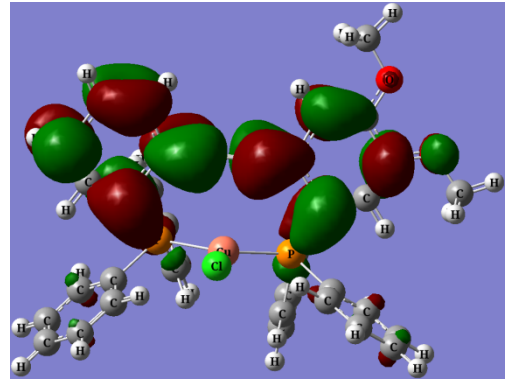

LUMO

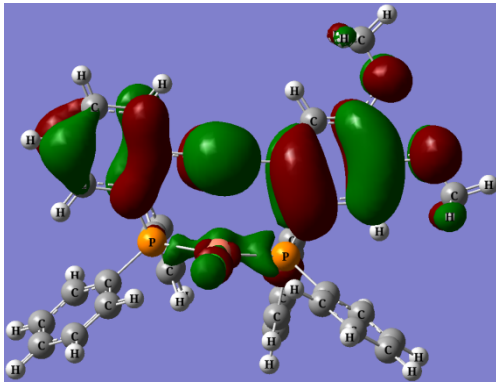

HOMO-1

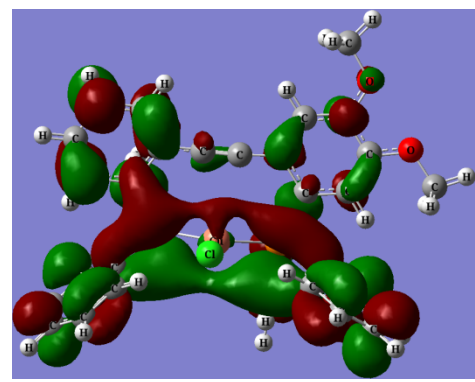

LUMO+1

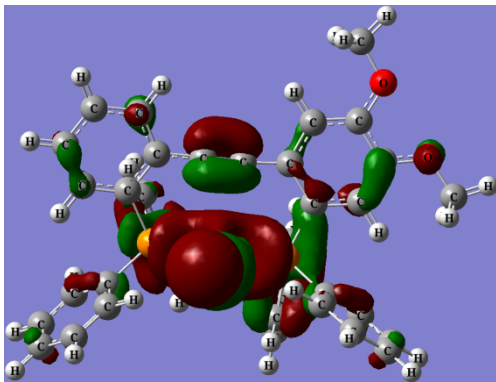

HOMO-2

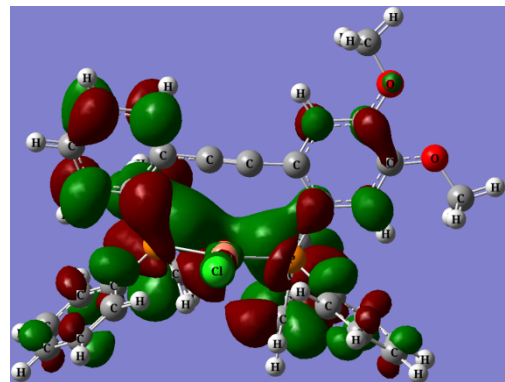

LUMO+2

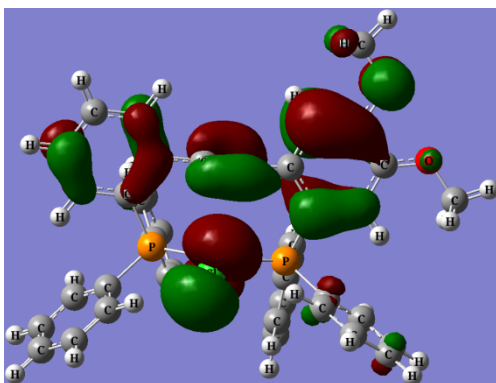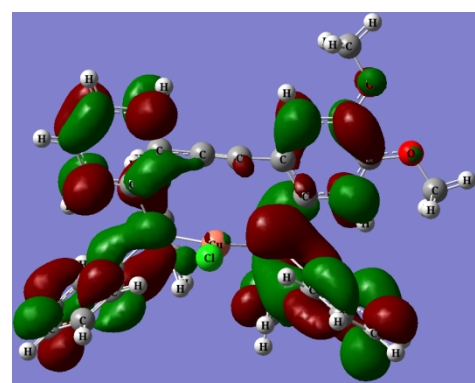

HOMO-3

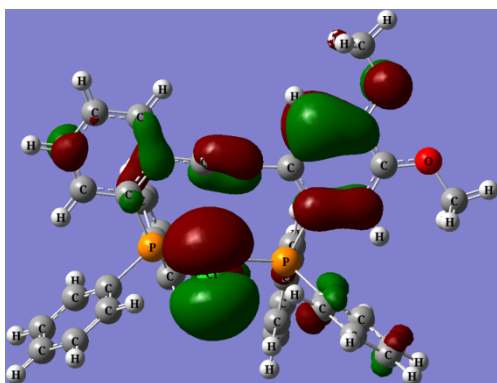

LUMO+3

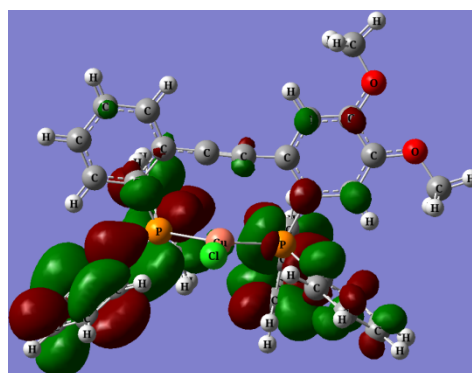

HOMO-4

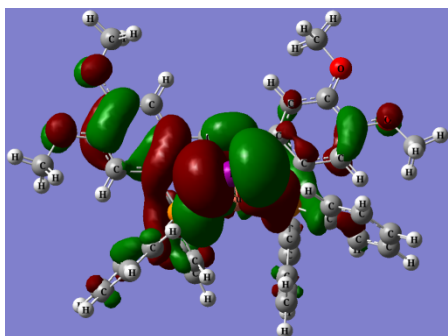

LUMO+4

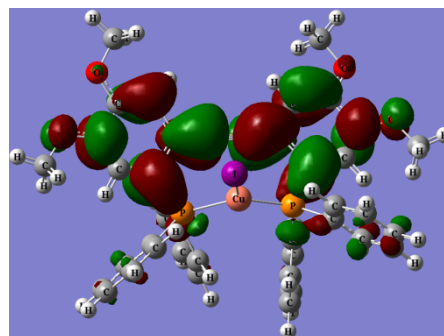

6

HOMO

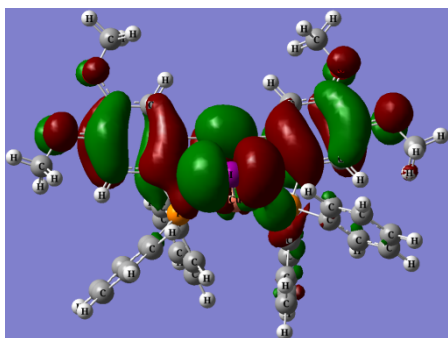

LUMO

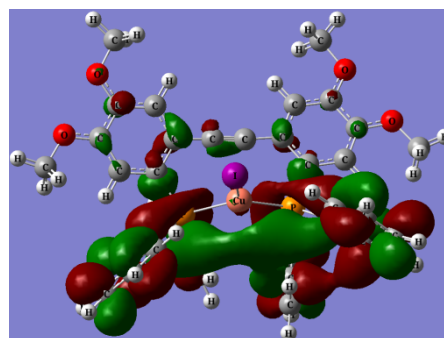

HOMO-1

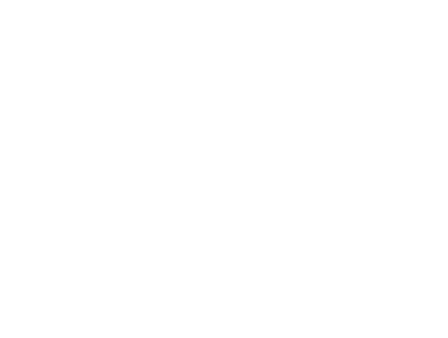

LUMO+1

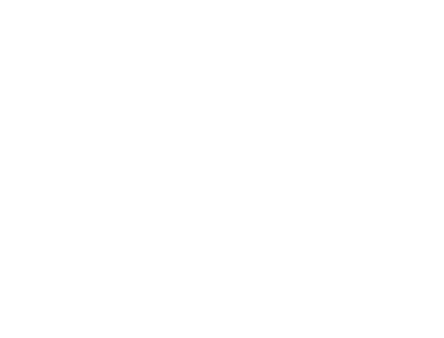

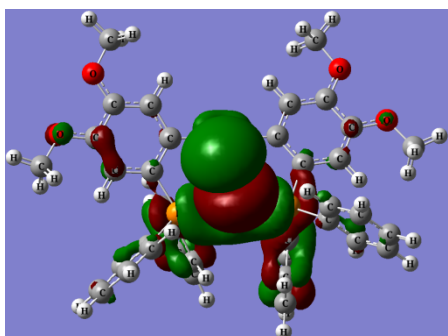

HOMO-2

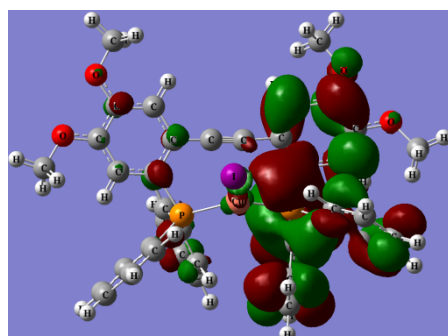

LUMO+2

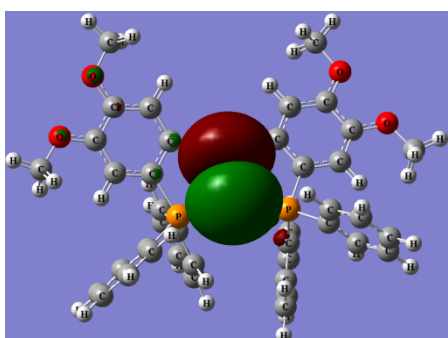

HOMO-3

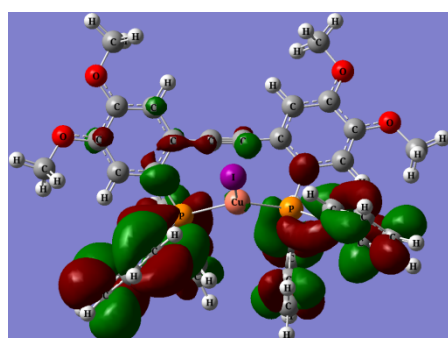

LUMO+3

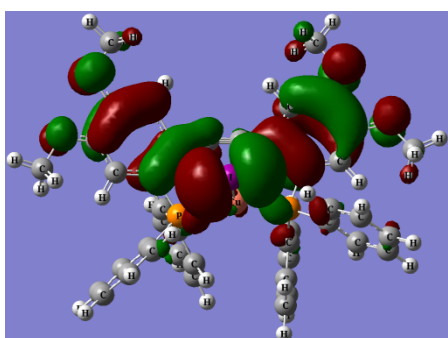

HOMO-4

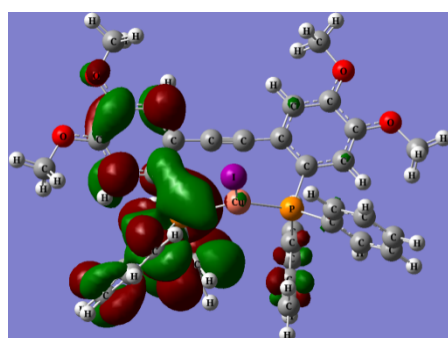

LUMO+4

Figure S65. Contour plots of frontier molecular orbitals of complexes 1–7 in  $\text{CH}_2\text{Cl}_2$ .



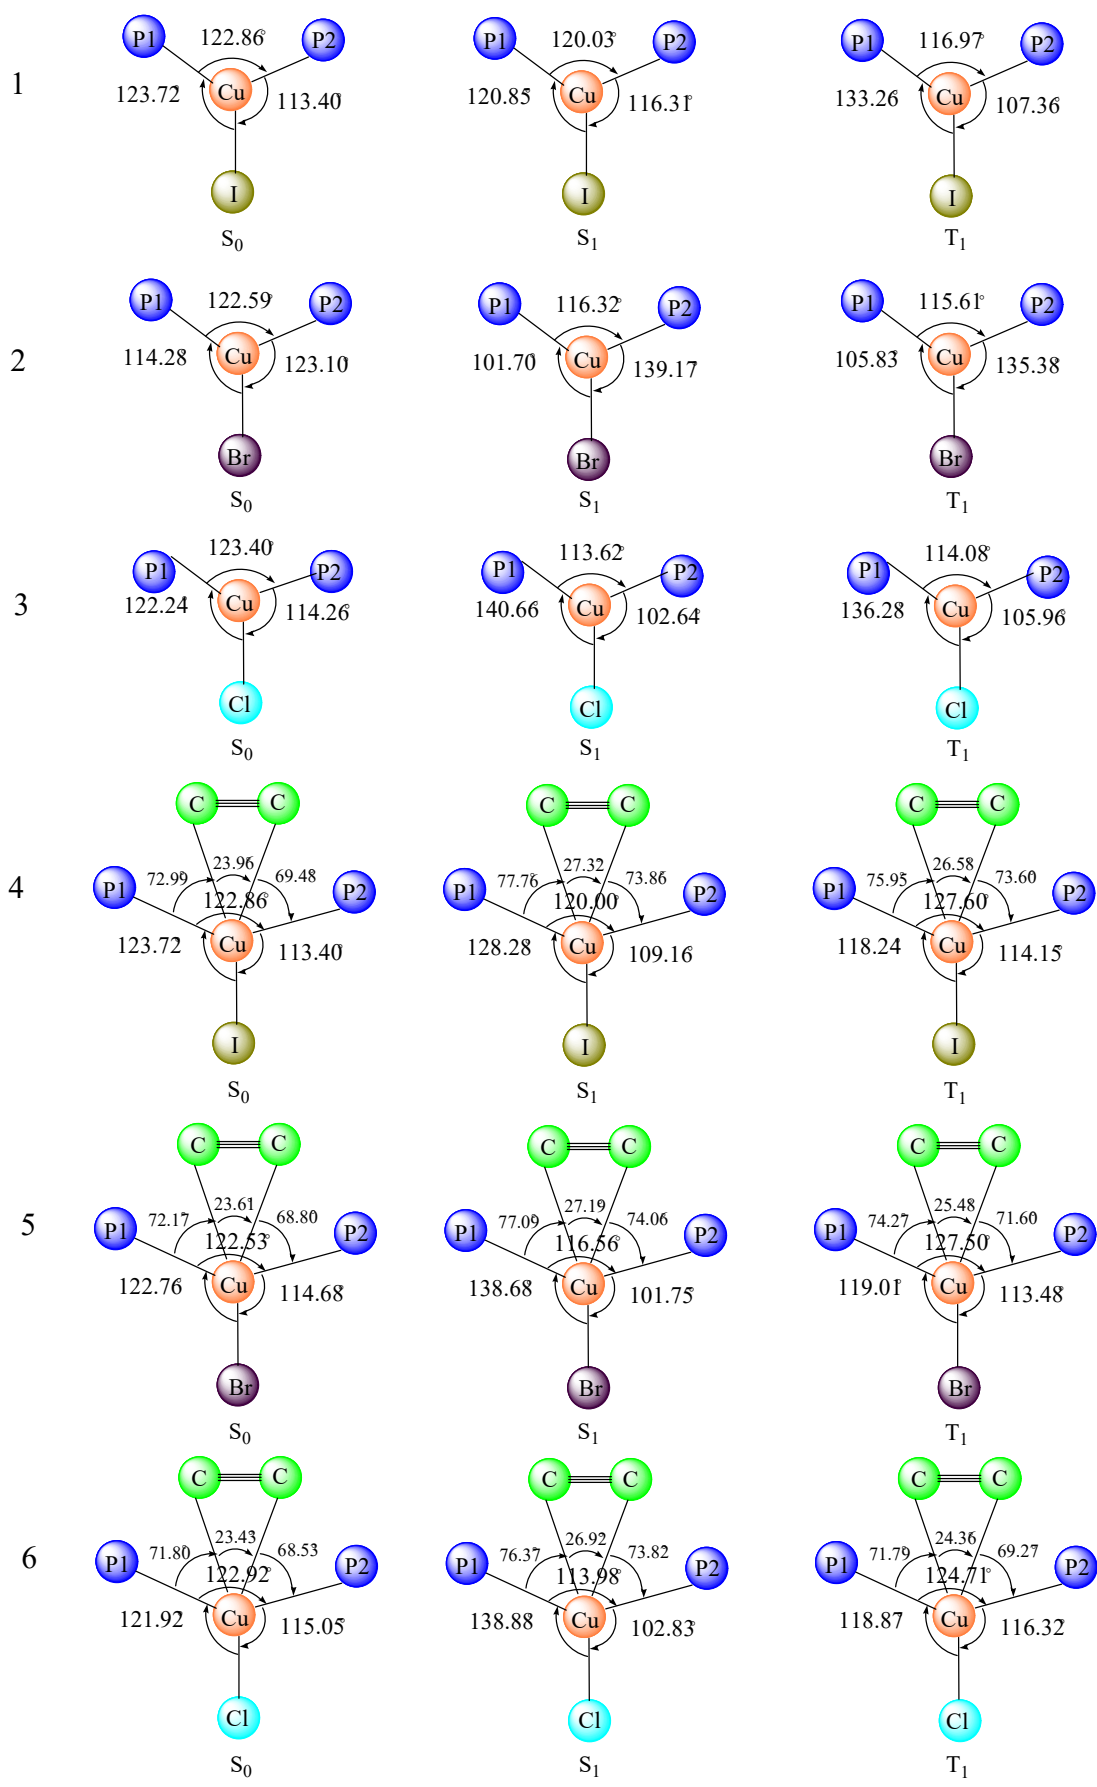

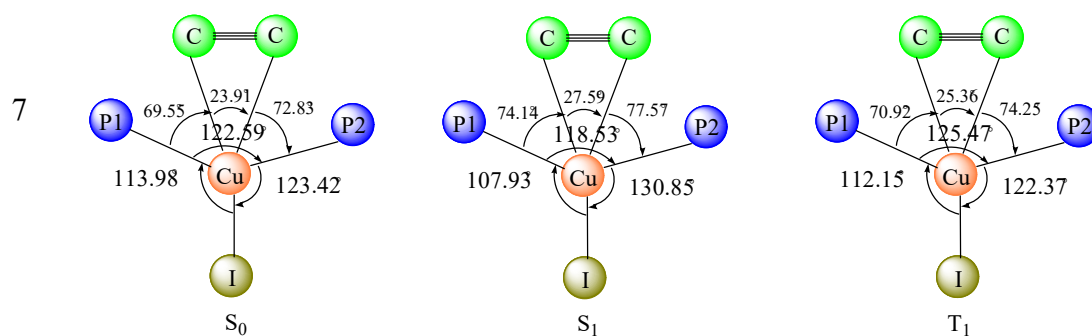

**Figure S66.** The core structures in the optimized  $S_0$ ,  $S_1$ , and  $T_1$  geometries for complexes **1-7**.

**Table S1.** Computed excitation states for complex **1** in  $\text{CH}_2\text{Cl}_2$ .

| State | $\lambda(\text{nm})/E(\text{eV})$ | Configurations                                                                                                                                                                                                   | $f$    |
|-------|-----------------------------------|------------------------------------------------------------------------------------------------------------------------------------------------------------------------------------------------------------------|--------|
| 1     | 416.3 / 2.98                      | H→L (99)                                                                                                                                                                                                         | 0.0113 |
| 4     | 332.3 / 3.73                      | H-3→L (14); H→L+1 (78); H→L+2 (5)                                                                                                                                                                                | 0.0636 |
| 5     | 324.4 / 3.82                      | H-4→L (6); H-3→L (74); H→L+1 (14)                                                                                                                                                                                | 0.3989 |
| 8     | 312.9 / 3.96                      | H-4→L (57); H-3→L (5); H→L+3 (32)                                                                                                                                                                                | 0.1992 |
| 9     | 307.7 / 4.03                      | H→L+4 (92)                                                                                                                                                                                                       | 0.0623 |
| 12    | 297.6 / 4.17                      | H-1→L+1 (3); H→L+5 (91)                                                                                                                                                                                          | 0.0913 |
| 18    | 283.4 / 4.37                      | H-3→L+1 (6); H-2→L+2 (4); H-1→L+3 (19);<br>H→L+7 (2); H→L+8 (59)                                                                                                                                                 | 0.0847 |
| 48    | 252.6 / 4.91                      | H-16→L (3); H-14→L (2); H-5→L+1 (47);<br>H-4→L+1 (3); H-4→L+2 (5); H-4→L+3 (14);<br>H-2→L+8 (7)                                                                                                                  | 0.0670 |
| 72    | 237.3 / 5.22                      | H-18→L (3); H-16→L (4); H-15→L (3); H-14→L(3);<br>H-4→L+6 (11); H-3→L+6 (2); H-3→L+7 (9);<br>H-3→L+8 (14); H-3→L+9 (4); H-2→L+10 (14); H-<br>2→L+11 (5)                                                          | 0.0546 |
| 88    | 228.5 / 5.43                      | H-9→L+2 (6); H-8→L+2 (7); H-7→L+1 (2);<br>H-7→L+2 (4); H-7→L+3 (2); H-7→L+4 (5);<br>H-6→L+1 (4); H-6→L+2 (4); H-6→L+3 (5);<br>H-6→L+4 (2); H-5→L+6 (2); H-4→L+7 (14);<br>H-4→L+8 (9); H-3→L+10 (4); H-1→L+12 (4) | 0.0605 |

**Table S2.** Computed excitation states for complex **2** in  $\text{CH}_2\text{Cl}_2$ .

| State | $\lambda(\text{nm})/E(\text{eV})$ | Configurations                                | $f$    |
|-------|-----------------------------------|-----------------------------------------------|--------|
| 1     | 407.4 / 3.04                      | H→L (99)                                      | 0.0162 |
| 3     | 330.1 / 3.76                      | H-2→L (43); H→L+1 (51)                        | 0.2168 |
| 4     | 323.5 / 3.83                      | H-3→L (26); H-2→L (33); H-1→L (2); H→L+1 (35) | 0.1642 |
| 5     | 317.6 / 3.90                      | H-3→L (70); H-2→L (18); H→L+1 (9)             | 0.2873 |
| 7     | 308.4 / 4.02                      | H→L+2 (3); H→L+3 (90)                         | 0.0717 |

|    |              |                                                                     |        |
|----|--------------|---------------------------------------------------------------------|--------|
| 8  | 302.7 / 4.10 | H→L+4 (94)                                                          | 0.0685 |
| 12 | 292.2 / 4.24 | H-4→L (11); H-1→L+1 (9); H→L+5 (75)                                 | 0.0906 |
| 18 | 277.1 / 4.47 | H-1→L+3 (53); H-1→L+4 (3); H→L+8 (32)                               | 0.0897 |
| 25 | 265.5 / 4.67 | H-8→L (11); H-7→L (2); H-3→L+1 (57);<br>H-2→L+1 (3); H-1→L+5 (15)   | 0.0531 |
| 31 | 261.5 / 4.74 | H-2→L+2 (2); H-2→L+3 (4); H-1→L+6 (64);<br>H-1→L+7 (2); H→L+10 (14) | 0.0813 |
| 71 | 233.9 / 5.30 | H-5→L+4 (25); H-3→L+7 (28); H-3→L+8 (29)                            | 0.0533 |

**Table S3.** Computed excitation states for complex **3** in CH<sub>2</sub>Cl<sub>2</sub>.

| State | $\lambda(\text{nm})/E(\text{eV})$ | Configurations                                                                             | $f$    |
|-------|-----------------------------------|--------------------------------------------------------------------------------------------|--------|
| 1     | 402.7 / 3.08                      | H→L (99)                                                                                   | 0.0190 |
| 3     | 328.7 / 3.77                      | H-2→L (46); H→L+1 (49)                                                                     | 0.2616 |
| 4     | 320.0 / 3.88                      | H-2→L (46); H-1→L (3); H→L+1 (45)                                                          | 0.3949 |
| 7     | 306.0 / 4.05                      | H-3→L (13); H-2→L (2); H→L+2 (5); H→L+3 (74)                                               | 0.1012 |
| 8     | 300.5 / 4.13                      | H→L+4 (94)                                                                                 | 0.0709 |
| 11    | 289.2 / 4.29                      | H-4→L (3); H→L+5 (91)                                                                      | 0.1109 |
| 18    | 275.2 / 4.50                      | H-1→L+3 (45); H-1→L+4 (5); H→L+8 (39)                                                      | 0.0736 |
| 23    | 267.0 / 4.64                      | H-8→L (50); H-7→L (8); H-2→L+1 (23);<br>H-2→L+2 (4); H-2→L+3 (4)                           | 0.0887 |
| 31    | 260.0 / 4.77                      | H-15→L (2); H-10→L (5); H-2→L+3 (3); H-1→L+6 (58);<br>H-1→L+7 (3); H→L+10 (13); H→L+11 (4) | 0.0573 |

**Table S4.** Computed excitation states for complex **4** in CH<sub>2</sub>Cl<sub>2</sub>.

| State | $\lambda(\text{nm})/E(\text{eV})$ | Configurations                                                                                                           | $f$    |
|-------|-----------------------------------|--------------------------------------------------------------------------------------------------------------------------|--------|
| 1     | 399.3 / 3.10                      | H→L (99)                                                                                                                 | 0.0129 |
| 2     | 361.0 / 3.43                      | H-2→L (27); H-1→L (69)                                                                                                   | 0.1707 |
| 3     | 343.9 / 3.61                      | H-3→L (10); H-2→L (66); H-1→L (21)                                                                                       | 0.3359 |
| 4     | 337.5 / 3.67                      | H-3→L (88); H-2→L (4); H-1→L (6)                                                                                         | 0.1664 |
| 9     | 306.8 / 4.04                      | H→L+2 (2); H→L+3 (13); H→L+4 (79)                                                                                        | 0.0694 |
| 12    | 296.5 / 4.18                      | H→L+5 (89); H→L+6 (2)                                                                                                    | 0.0763 |
| 20    | 282.7 / 4.39                      | H-6→L (4); H-3→L+1 (27); H-2→L+2 (6); H-2→L+4 (5);<br>H-1→L+4 (13); H→L+6 (3); H→L+8 (32)                                | 0.0506 |
| 22    | 279.0 / 4.44                      | H-3→L+1 (23); H-2→L+2 (33); H-2→L+3 (25);<br>H→L+8 (6)                                                                   | 0.1008 |
| 23    | 277.7 / 4.47                      | H-6→L (12); H-5→L (5); H-2→L+2 (18);<br>H-2→L+3 (33); H-1→L+2 (4); H-1→L+3 (5);<br>H-1→L+5 (9); H-1→L+6 (5); H-1→L+7 (2) | 0.1081 |
| 28    | 269.5 / 4.60                      | H-6→L (7); H-3→L+4 (5); H-2→L+5 (4); H-1→L+6 (68)                                                                        | 0.0733 |
| 40    | 260.5 / 4.76                      | H-4→L+1 (8); H-3→L+5 (13); H-2→L+6 (54);<br>H-2→L+8 (4); H-1→L+8 (7)                                                     | 0.0586 |
| 46    | 254.4 / 4.87                      | H-17→L (2); H-14→L (5); H-13→L (4); H-12→L (4);                                                                          | 0.0903 |

|    |              |                                                                                                                                                                               |        |
|----|--------------|-------------------------------------------------------------------------------------------------------------------------------------------------------------------------------|--------|
| 49 | 252.4 / 4.91 | H-11→L (20); H-10→L (13); H-4→L-2 (35)<br>H-15→L (2); H-14→L (4); H-12→L (22); H-11→L (5);<br>H-9→L (2); H-5→L+1 (5); H-4→L+3 (40);<br>H-4→L+4 (3); H-3→L+6 (3); H-1→L+10 (3) | 0.0628 |
| 65 | 243.4 / 5.09 | H-18→L (2); H-17→L (8); H-16→L (11); H-6→L+2 (7);<br>H-5→L+2 (27); H-4→L+4 (5); H-4→L+5 (12); H-2→L+9<br>(4)                                                                  | 0.0800 |
| 72 | 238.8 / 5.19 | H-18→L (5); H-15→L (7); H-6→L+1 (20);<br>H-6→L+3 (8); H-6→L+4 (6); H-5→L+4 (35)                                                                                               | 0.0515 |
| 92 | 229.0 / 5.41 | H-10→L+1 (6); H-9→L+1 (5); H-8→L+1 (4); H-8→L+2<br>(2); H-7→L+1 (14); H-7→L+3 (3); H-6→L+3 (7); H-<br>6→L+4 (6); H-5→L+8 (2); H-4→L+6 (3); H-2→L+12 (9);<br>H-1→L+14 (2)      | 0.0603 |
| 94 | 227.6 / 5.45 | H-20→L (5); H-3→L+12 (32); H-3→L+13 (4); H-3→L+15<br>(11); H-2→L+12 (9); H-2→L+13 (3); H-2→L+15 (4); H-<br>1→L+14 (7)                                                         | 0.0614 |

**Table S5.** Computed excitation states for complex **5** in CH<sub>2</sub>Cl<sub>2</sub>.

| State | $\lambda(\text{nm})/E(\text{eV})$ | Configurations                                                                                                                                   | $f$    |
|-------|-----------------------------------|--------------------------------------------------------------------------------------------------------------------------------------------------|--------|
| 1     | 391.3 / 3.17                      | H→L (99)                                                                                                                                         | 0.0180 |
| 2     | 354.9 / 3.49                      | H-2→L (23); H-1→L (73)                                                                                                                           | 0.3370 |
| 3     | 339.2 / 3.66                      | H-2→L (74); H-1→L (22)                                                                                                                           | 0.3578 |
| 7     | 305.8 / 4.05                      | H-1→L+1 (3); H→L+3 (78); H→L+4 (15)                                                                                                              | 0.0601 |
| 8     | 302.1 / 4.10                      | H→L+3 (13); H→L+4 (80)                                                                                                                           | 0.0811 |
| 11    | 291.2 / 4.26                      | H-6→L (3); H-1→L+2 (5); H→L+5 (82)                                                                                                               | 0.0882 |
| 20    | 278.8 / 4.45                      | H-6→L (13); H-5→L (18); H-2→L+2 (3); H-2→L+3 (7);<br>H-1→L+2 (3); H-1→L+3 (6); H-1→L+4 (3);<br>H-1→L+6 (3); H-1→L+7 (4); H→L+8 (35)              | 0.0564 |
| 21    | 275.1 / 4.51                      | H-2→L+2 (59); H-2→L+3 (8); H→L+7 (4); H→L+8 (14)                                                                                                 | 0.1076 |
| 22    | 274.0 / 4.53                      | H-6→L (3); H-2→L+2 (5); H-2→L+3 (68); H-2→L+4 (3);<br>H-1→L+5 (4); H-1→L+6 (2); H→L+7 (3)                                                        | 0.0822 |
| 25    | 267.9 / 4.63                      | H-6→L (10); H-5→L (2); H-4→L (5); H-1→L+3 (2);<br>H-1→L+5 (11); H-1→L+6 (52); H-1→L+7 (3)                                                        | 0.1276 |
| 35    | 258.7 / 4.79                      | H-9→L (50); H-7→L (2); H-2→L+8 (4);<br>H-1→L+8 (22); H→L+9 (2); H→L+11 (3)                                                                       | 0.0534 |
| 36    | 257.1 / 4.82                      | H-10→L (5); H-9→L (3); H-2→L+6 (73); H-1→L+8 (2)                                                                                                 | 0.0548 |
| 54    | 244.1 / 5.08                      | H-17→L (4); H-16→L (2); H-15→L (7); H-13→L (3);<br>H-6→L+1 (8); H-5→L+1 (38); H-4→L+2 (6); H-4→L+3<br>(5); H-3→L+5 (3); H-1→L+10 (3); H→L+12 (2) | 0.0501 |

**Table S6.** Computed excitation states for complex **6** in CH<sub>2</sub>Cl<sub>2</sub>.

| State | $\lambda(\text{nm})/E(\text{eV})$ | Configurations                    | $f$    |
|-------|-----------------------------------|-----------------------------------|--------|
| 1     | 388.0 / 3.20                      | H→L (99)                          | 0.0204 |
| 2     | 353.7 / 3.51                      | H-2→L (20); H-1→L (76); H→L+1 (2) | 0.4029 |

|    |              |                                                                                                                                                                           |        |
|----|--------------|---------------------------------------------------------------------------------------------------------------------------------------------------------------------------|--------|
| 3  | 338.2 / 3.67 | H-2→L (78); H-1→L (19)                                                                                                                                                    | 0.3028 |
| 6  | 303.7 / 4.08 | H-1→L+1 (8); H→L+3 (75); H→L+4 (12)                                                                                                                                       | 0.0761 |
| 8  | 299.9 / 4.13 | H-3→L (19); H→L+3 (13); H→L+4 (60)                                                                                                                                        | 0.0511 |
| 12 | 288.3 / 4.30 | H-4→L (4); H-1→L+2 (31); H-1→L+3 (6); H→L+5 (50)                                                                                                                          | 0.0561 |
| 21 | 272.4 / 4.55 | H-6→L (63); H-2→L+2 (19); H→L+8 (9)                                                                                                                                       | 0.0504 |
| 22 | 272.0 / 4.56 | H-6→L (10); H-2→L+2 (4); H-2→L+3 (61); H-2→L+4 (5);<br>H-1→L+5 (3); H-1→L+6 (3); H→L+7 (4); H→L+8 (2)                                                                     | 0.0618 |
| 25 | 267.5 / 4.63 | H-5→L (7); H-4→L (4); H-3→L (5); H-2→L+3 (3);<br>H-1→L+3 (2); H-1→L+5 (21); H-1→L+6 (37); H-1→L+7<br>(6)                                                                  | 0.1474 |
| 36 | 255.9 / 4.85 | H-2→L+6 (78)                                                                                                                                                              | 0.0572 |
| 65 | 235.2 / 5.27 | H-18→L (4); H-17→L (24); H-6→L+1 (7); H-5→L+3 (11);<br>H-4→L+2 (3); H-4→L+3 (14); H-3→L+3 (5); H-3→L+4<br>(2)                                                             | 0.0502 |
| 96 | 221.9 / 5.59 | H-16→L+1 (4); H-13→L+1 (2); H-12→L+1 (2); H-<br>11→L+1 (5); H-8→L+4 (2); H-5→L+5 (5); H-4→L+7 (6);<br>H-1→L+15 (13); H-1→L+18 (3); H→L+16 (4); H→L+18<br>(12); H→L+21 (2) | 0.0508 |
| 98 | 221.4 / 5.60 | H-6→L+5 (3); H-5→L+5 (34); H-4→L+5 (3);<br>H-4→L+6 (5); H-3→L+5 (4); H-3→L+6 (3);<br>H-2→L+13 (3); H→L+18 (12); H→L+21 (3)                                                | 0.0679 |

**Table S7.** Computed excitation states for complex **7** in CH<sub>2</sub>Cl<sub>2</sub>.

| State | $\lambda(\text{nm})/E(\text{eV})$ | Configurations                                                                                                         | $f$    |
|-------|-----------------------------------|------------------------------------------------------------------------------------------------------------------------|--------|
| 1     | 383.7 / 3.23                      | H-1→L (8); H→L (90)                                                                                                    | 0.0539 |
| 2     | 356.2 / 3.48                      | H-2→L (6); H-1→L (83); H→L (7)                                                                                         | 0.6159 |
| 3     | 338.8 / 3.66                      | H-2→L (92); H-1→L (6)                                                                                                  | 0.1498 |
| 11    | 301.5 / 4.11                      | H-6→L (3); H-5→L (3); H-4→L (24);<br>H-1→L+2 (53); H-1→L+4 (3); H→L+2 (5)                                              | 0.1165 |
| 13    | 295.4 / 4.20                      | H-6→L (5); H-4→L (3); H-1→L+3 (35); H-1→L+4 (19);<br>H-1→L+5 (2); H→L+3 (2); H→L+5 (25)                                | 0.0888 |
| 20    | 283.0 / 4.38                      | H-7→L (4); H-6→L (3); H-5→L (2); H-3→L+1 (7);<br>H-2→L+2 (61); H→L+6 (6); H→L+8 (9)                                    | 0.1290 |
| 26    | 276.1 / 4.49                      | H-3→L+1 (8); H-2→L+2 (2); H-2→L+4 (68);<br>H-1→L+6 (5); H-1→L+8 (4)                                                    | 0.0776 |
| 28    | 273.2 / 4.54                      | H-8→L (4); H-7→L (7); H-3→L+2 (12);<br>H-2→L+4 (6); H-1→L+7 (17); H-1→L+8 (38)                                         | 0.0832 |
| 38    | 261.5 / 4.74                      | H-4→L+2 (39); H-2→L+6 (6); H-2→L+7 (7); H→L+11<br>(33)                                                                 | 0.0506 |
| 39    | 260.3 / 4.76                      | H-8→L (5); H-4→L+2 (18); H-2→L+8 (2); H-1→L+8 (6);<br>H-1→L+9 (26); H-1→L+10 (5); H→L+11 (20)                          | 0.0552 |
| 43    | 257.5 / 4.81                      | H-9→L (15); H-8→L (35); H-7→L (4);<br>H-4→L+2 (3); H-4→L+4 (7); H-2→L+7 (4);<br>H-2→L+8 (3); H-1→L+9 (6); H-1→L+10 (8) | 0.0641 |

|    |              |                                                                                                                                            |        |
|----|--------------|--------------------------------------------------------------------------------------------------------------------------------------------|--------|
| 45 | 256.9 / 4.83 | H-8→L (3); H-7→L (6); H-6→L (2); H-4→L+2 (3);<br>H-4→L+3 (48); H-1→L+8 (2); H-1→L+9 (2); H-1→L+10<br>(20)                                  | 0.0657 |
| 53 | 249.8 / 4.96 | H-14→L (2); H-10→L (4); H-9→L (2);<br>H-8→L (7); H-7→L+1 (2); H-6→L+1 (17);<br>H-4→L+4 (3); H-1→L+11 (34); H→L+12 (5)                      | 0.0660 |
| 90 | 232.9 / 5.32 | H-14→L (2); H-10→L+2 (3); H-7→L+1 (9); H-6→L+5<br>(13); H-5→L+6 (2); H-4→L+8 (14); H-1→L+14 (4);<br>H-1→L+15 (5); H-1→L+21 (2); H→L+21 (3) | 0.0680 |

**Table S8.** Selected bond lengths (Å) and angles (°) in the optimized S<sub>0</sub>, S<sub>1</sub>, and T<sub>1</sub> geometries for complexes **1-7**.

| Complex  | Geometry       | Cu-X   | Cu-P             | Cu-C≡            | P-Cu-X           | P-Cu-P | P-Cu-C≡        | ≡C-Cu-C≡ |
|----------|----------------|--------|------------------|------------------|------------------|--------|----------------|----------|
| <b>1</b> | S <sub>0</sub> | 2.5725 | 2.2873<br>2.3101 | 2.9088<br>2.9037 | 123.72<br>113.40 | 122.86 | /              | /        |
|          | S <sub>1</sub> | 2.5930 | 2.3016<br>2.3158 | 2.6527<br>2.6452 | 120.85<br>116.31 | 120.03 | /              | /        |
|          | T <sub>1</sub> | 2.5478 | 2.3139<br>2.3386 | 2.6420<br>2.5825 | 133.26<br>107.36 | 116.97 | /              | /        |
| <b>2</b> | S <sub>0</sub> | 2.3887 | 2.3074<br>2.2870 | 2.9459<br>2.9454 | 114.28<br>123.10 | 122.59 | /              | /        |
|          | S <sub>1</sub> | 2.3386 | 2.3236<br>2.3295 | 2.6664<br>2.6567 | 101.70<br>139.17 | 116.32 | /              | /        |
|          | T <sub>1</sub> | 2.3501 | 2.3412<br>2.3114 | 2.6394<br>2.5859 | 105.83<br>135.38 | 115.61 | /              | /        |
| <b>3</b> | S <sub>0</sub> | 2.2714 | 2.2822<br>2.3020 | 2.9627<br>2.9590 | 122.24<br>114.26 | 123.40 | /              | /        |
|          | S <sub>1</sub> | 2.2092 | 2.3303<br>2.3296 | 2.6922<br>2.6829 | 140.66<br>102.64 | 113.62 | /              | /        |
|          | T <sub>1</sub> | 2.2248 | 2.3095<br>2.3431 | 2.6494<br>2.6122 | 136.28<br>105.96 | 114.08 | /              | /        |
| <b>4</b> | S <sub>0</sub> | 2.5736 | 2.2877<br>2.3088 | 2.9196<br>2.9176 | 123.45<br>113.78 | 122.77 | 72.99<br>69.48 | 23.96    |
|          | S <sub>1</sub> | 2.5783 | 2.3124<br>2.3149 | 2.6178<br>2.6517 | 128.28<br>109.16 | 120.00 | 77.76<br>73.86 | 27.32    |
|          | T <sub>1</sub> | 2.5959 | 2.2943<br>2.2988 | 2.7402<br>2.7507 | 118.24<br>114.15 | 127.60 | 75.95<br>73.60 | 26.58    |
| <b>5</b> | S <sub>0</sub> | 2.3900 | 2.2872<br>2.3065 | 2.9592<br>2.9638 | 122.76<br>114.68 | 122.53 | 72.17<br>62.80 | 23.61    |
|          | S <sub>1</sub> | 2.3392 | 2.3321<br>2.3232 | 2.6311<br>2.6599 | 138.68<br>101.75 | 116.56 | 77.09<br>74.06 | 27.19    |
|          | T <sub>1</sub> | 2.3985 | 2.2868<br>2.2954 | 2.8536<br>2.8610 | 119.01<br>113.48 | 127.50 | 74.27<br>71.60 | 25.48    |
| <b>6</b> | S <sub>0</sub> | 2.2718 | 2.2832<br>2.2996 | 2.9782<br>2.9873 | 121.92<br>115.05 | 122.92 | 71.80<br>68.53 | 23.43    |
|          | S <sub>1</sub> | 2.2101 | 2.3336           | 2.6660           | 139.88           | 113.98 | 76.37          | 26.92    |

|   |                |        |        |        |        |        |       |       |
|---|----------------|--------|--------|--------|--------|--------|-------|-------|
|   |                |        | 2.3293 | 2.6761 | 102.83 |        | 73.82 |       |
|   | T <sub>1</sub> | 2.2751 | 2.2934 | 2.9753 | 118.87 | 124.71 | 71.20 | 24.36 |
|   |                |        | 2.2968 | 2.9883 | 116.32 |        | 69.27 |       |
| 7 | S <sub>0</sub> | 2.5760 | 2.3085 | 2.9236 | 113.98 | 122.69 | 69.55 | 23.91 |
|   |                |        | 2.2873 | 2.9269 | 123.42 |        | 72.83 |       |
|   | S <sub>1</sub> | 2.5660 | 2.3182 | 2.6428 | 107.93 | 118.53 | 74.14 | 27.29 |
|   |                |        | 2.3166 | 2.6347 | 130.85 |        | 77.57 |       |
|   | T <sub>1</sub> | 2.5878 | 2.3071 | 2.8867 | 112.15 | 125.47 | 70.92 | 25.36 |
|   |                |        | 2.2925 | 2.8482 | 122.37 |        | 74.25 |       |

**Table S9.** Cartesian coordinates of the optimized S<sub>0</sub> geometry for complex **1**.

| Atom | x           | y           | z           |
|------|-------------|-------------|-------------|
| I    | -0.38423354 | -3.40592653 | -0.2703049  |
| Cu   | -0.0076503  | -0.86186999 | -0.21084816 |
| P    | 2.05987576  | 0.11487742  | -0.1558457  |
| P    | -1.97055027 | 0.3553321   | -0.16416402 |
| C    | 3.31901651  | -2.10843774 | -1.21827017 |
| H    | 2.47320099  | -2.6430057  | -0.79941129 |
| C    | -1.87211452 | 2.17097504  | 0.06921294  |
| C    | -4.24832195 | -0.46773148 | 1.32355675  |
| H    | -4.81873981 | -0.3134247  | 0.41657277  |
| C    | 2.35336596  | 2.92814288  | 0.13754448  |
| H    | 2.49687704  | 2.74877225  | 1.19547145  |
| C    | 1.87449989  | 0.12745208  | 2.66556987  |
| C    | 2.15058481  | 1.85438415  | -0.73159388 |
| C    | 2.74214304  | 0.19743334  | 1.55108075  |
| C    | -2.32521269 | 2.81696377  | 1.22192952  |
| H    | -2.79287765 | 2.24721679  | 2.01452668  |
| C    | -2.78784491 | -0.89043867 | 3.65990094  |
| H    | -2.20839583 | -1.06280065 | 4.55813836  |
| C    | -3.17236226 | 0.14399888  | -1.5264903  |
| C    | 2.41786459  | 0.21035829  | 3.9623988   |
| H    | 1.74714283  | 0.15273705  | 4.81032566  |
| C    | -2.87779731 | -0.2182413  | 1.3226377   |
| C    | 4.11636237  | 0.32629492  | 1.76665071  |
| H    | 4.78602392  | 0.3557961   | 0.91678036  |
| C    | -0.72820637 | -0.22127808 | 2.52813334  |
| C    | -4.07742453 | 1.14346193  | -1.89980328 |
| H    | -4.06877731 | 2.09912493  | -1.39007761 |
| C    | 0.46989993  | -0.04363801 | 2.53937772  |
| C    | -4.88691778 | -0.92160512 | 2.47557387  |
| H    | -5.95275525 | -1.11612099 | 2.45813603  |
| C    | -4.15584639 | -1.12964887 | 3.64362179  |

|   |             |             |             |
|---|-------------|-------------|-------------|
| H | -4.64936291 | -1.48778827 | 4.53922584  |
| C | 1.95167058  | 2.10706607  | -2.0958494  |
| H | 1.78064493  | 1.28148238  | -2.77824834 |
| C | -3.18122664 | -1.08692531 | -2.19418359 |
| H | -2.47835291 | -1.86173983 | -1.90615891 |
| C | -4.98616189 | 0.91158519  | -2.92946614 |
| H | -5.68422775 | 1.68969471  | -3.21658532 |
| C | 3.39030327  | -0.71523814 | -1.1053128  |
| C | 4.32133508  | -2.80362867 | -1.88989843 |
| H | 4.25553807  | -3.88184757 | -1.97623906 |
| C | -4.99925847 | -0.31785975 | -3.58692524 |
| H | -5.70797982 | -0.4964473  | -4.38750206 |
| C | -2.13103637 | -0.4420288  | 2.50335339  |
| C | 5.39234802  | -2.11688821 | -2.45809556 |
| H | 6.16810801  | -2.66017548 | -2.98543542 |
| C | 4.46359536  | -0.02691881 | -1.68334923 |
| H | 4.51688532  | 1.05274384  | -1.6154774  |
| C | -1.26864468 | 2.92444322  | -0.94526421 |
| H | -0.895051   | 2.43169611  | -1.83471269 |
| C | 2.38043826  | 4.23273268  | -0.35281193 |
| H | 2.53572691  | 5.05836283  | 0.33185127  |
| C | 4.63900127  | 0.40587256  | 3.05246326  |
| H | 5.70848581  | 0.50513728  | 3.19520451  |
| C | 2.21336422  | 4.47527289  | -1.71272154 |
| H | 2.24583567  | 5.48974796  | -2.09296964 |
| C | 3.78370566  | 0.35080183  | 4.15299827  |
| H | 4.18319067  | 0.407589    | 5.1586648   |
| C | -4.09761972 | -1.31474645 | -3.21725383 |
| H | -4.10159312 | -2.27078826 | -3.7276397  |
| C | 1.9954907   | 3.40763239  | -2.58429708 |
| H | 1.8567618   | 3.58899555  | -3.64404277 |
| C | -1.59876889 | 4.94318712  | 0.33354531  |
| H | -1.49360441 | 6.01712797  | 0.43565087  |
| C | 5.46008784  | -0.72766711 | -2.35747319 |
| H | 6.28761554  | -0.18910749 | -2.80513479 |
| C | -2.18281092 | 4.19766622  | 1.35386896  |
| H | -2.5357919  | 4.68886312  | 2.25350844  |
| C | -1.14549967 | 4.30234764  | -0.81941526 |
| H | -0.68018264 | 4.87243619  | -1.61317958 |

**Table S10.** Cartesian coordinates of the optimized S<sub>1</sub> geometry for complex **1**.

| Atom | x           | y           | z           |
|------|-------------|-------------|-------------|
| I    | -0.08360233 | -3.39165373 | -0.75900118 |



|    |             |             |             |
|----|-------------|-------------|-------------|
| Cu | 0.00014802  | -0.902137   | -0.03854795 |
| P  | 1.98032948  | 0.27044394  | -0.07293498 |
| P  | -2.01861522 | 0.23246502  | -0.02997068 |
| C  | 3.70316424  | -1.81276653 | -0.71075579 |
| H  | 3.13385264  | -2.35310392 | 0.04088488  |
| C  | -1.81671148 | 2.00597811  | 0.38661399  |
| C  | -4.32294278 | -0.68186224 | 1.34999536  |
| H  | -4.90170963 | -0.37553224 | 0.48364812  |
| C  | 2.14038391  | 3.10035839  | -0.07260796 |
| H  | 2.47265194  | 3.01727863  | 0.95709119  |
| C  | 1.76820773  | -0.05621389 | 2.69936435  |
| C  | 1.81763528  | 1.9444201   | -0.79173096 |
| C  | 2.60144975  | 0.40582303  | 1.61250933  |
| C  | -1.79989389 | 2.4249022   | 1.72420881  |
| H  | -1.96179938 | 1.70676565  | 2.51976449  |
| C  | -2.84444113 | -1.49571552 | 3.58830102  |
| H  | -2.2680506  | -1.81463569 | 4.45165406  |
| C  | -3.11650522 | 0.23031258  | -1.4875741  |
| C  | 2.36080651  | -0.08060206 | 4.00406855  |
| H  | 1.75979766  | -0.44405582 | 4.83239705  |
| C  | -2.93953684 | -0.51006199 | 1.34570422  |
| C  | 3.91056113  | 0.83623478  | 1.86327224  |
| H  | 4.52805486  | 1.15715298  | 1.02732141  |
| C  | -0.76238578 | -0.75719347 | 2.49800977  |
| C  | -4.19108071 | 1.12754872  | -1.60382503 |
| H  | -4.36605851 | 1.86421514  | -0.82555859 |
| C  | 0.44643547  | -0.46425827 | 2.5316988   |
| C  | -4.97912558 | -1.25046327 | 2.44663267  |
| H  | -6.05557259 | -1.38804412 | 2.42960929  |
| C  | -4.21965963 | -1.64822125 | 3.5659308   |
| H  | -4.71792644 | -2.0898523  | 4.42557333  |
| C  | 1.35766928  | 2.06069063  | -2.11379654 |
| H  | 1.08078231  | 1.16798072  | -2.67009502 |
| C  | -2.88773759 | -0.70172723 | -2.50981401 |
| H  | -2.04974595 | -1.38757687 | -2.43433929 |
| C  | -5.02788797 | 1.0809365   | -2.71936826 |
| H  | -5.858374   | 1.77725861  | -2.79916047 |
| C  | 3.37282682  | -0.48073404 | -1.00860107 |
| C  | 4.76585923  | -2.44066347 | -1.35608961 |
| H  | 5.01185553  | -3.47061788 | -1.11238327 |
| C  | -4.79928563 | 0.14178036  | -3.73054345 |
| H  | -5.45142146 | 0.10848992  | -4.5990632  |
| C  | -2.14761107 | -0.92780322 | 2.47829449  |
| C  | 5.51335451  | -1.74656603 | -2.31542432 |

|   |             |             |             |
|---|-------------|-------------|-------------|
| H | 6.33946364  | -2.23731252 | -2.82263205 |
| C | 4.12962903  | 0.21165837  | -1.96197546 |
| H | 3.89755139  | 1.24497848  | -2.19684039 |
| C | -1.59694949 | 2.94545584  | -0.63182237 |
| H | -1.59586705 | 2.63202553  | -1.67086925 |
| C | 2.03396054  | 4.354788    | -0.67940778 |
| H | 2.28095482  | 5.24759618  | -0.11157561 |
| C | 4.44854871  | 0.83388559  | 3.14782179  |
| H | 5.46667129  | 1.167866    | 3.31988802  |
| C | 1.61361605  | 4.46242843  | -2.00625035 |
| H | 1.5409655   | 5.43891319  | -2.4777062  |
| C | 3.65241174  | 0.35551752  | 4.21685418  |
| H | 4.06306583  | 0.3277351   | 5.22324628  |
| C | -3.72796544 | -0.74886354 | -3.62475064 |
| H | -3.54150462 | -1.47563835 | -4.41058179 |
| C | 1.26955162  | 3.3114385   | -2.72293877 |
| H | 0.92581505  | 3.38921097  | -3.75108069 |
| C | -1.37443036 | 4.70235514  | 1.01639978  |
| H | -1.20417875 | 5.74767742  | 1.26021918  |
| C | 5.19383127  | -0.42159213 | -2.61338327 |
| H | 5.77331474  | 0.12755128  | -3.35089537 |
| C | -1.5751298  | 3.76801366  | 2.03488906  |
| H | -1.56111015 | 4.08138704  | 3.07523687  |
| C | -1.38963875 | 4.28785513  | -0.31813168 |
| H | -1.22646342 | 5.00583239  | -1.11588148 |

**Table S11.** Cartesian coordinates of the optimized T<sub>1</sub> geometry for complex **1**.

| Atom | x        | y        | z         |
|------|----------|----------|-----------|
| I    | 6.102909 | 3.165607 | 11.957891 |
| Cu   | 4.224119 | 4.885611 | 12.013763 |
| P    | 3.496036 | 6.488202 | 10.511861 |
| P    | 2.708453 | 4.210183 | 13.661596 |
| C    | 5.307966 | 5.49857  | 8.637949  |
| H    | 5.810773 | 5.070655 | 9.500344  |
| C    | 1.314547 | 5.384961 | 13.800489 |
| C    | 3.638604 | 3.397201 | 16.193175 |
| H    | 2.954071 | 2.557935 | 16.115023 |
| C    | 1.070905 | 7.950807 | 10.66823  |
| H    | 1.643828 | 8.732501 | 11.156162 |
| C    | 4.873081 | 8.149298 | 12.296466 |
| C    | 1.704926 | 6.769223 | 10.268147 |
| C    | 4.217126 | 8.077614 | 11.014359 |
| C    | 1.371785 | 6.481731 | 14.672333 |

|   |           |           |           |
|---|-----------|-----------|-----------|
| H | 2.23963   | 6.626816  | 15.306021 |
| C | 5.425379  | 5.566039  | 16.427679 |
| H | 6.126655  | 6.391702  | 16.499277 |
| C | 1.944744  | 2.558574  | 13.646263 |
| C | 5.533535  | 9.375975  | 12.634263 |
| H | 6.049202  | 9.436852  | 13.587669 |
| C | 3.685098  | 4.340192  | 15.164561 |
| C | 4.208398  | 9.190983  | 10.17302  |
| H | 3.723323  | 9.119347  | 9.203163  |
| C | 4.80846   | 6.300471  | 14.167146 |
| C | 0.779746  | 2.283829  | 14.382366 |
| H | 0.296312  | 3.07452   | 14.947928 |
| C | 4.883727  | 7.086948  | 13.19194  |
| C | 4.435851  | 3.531995  | 17.329501 |
| H | 4.36838   | 2.804712  | 18.132301 |
| C | 5.321716  | 4.639102  | 17.436763 |
| H | 5.939031  | 4.745659  | 18.325002 |
| C | 0.94836   | 5.75434   | 9.657898  |
| H | 1.430998  | 4.828915  | 9.353009  |
| C | 2.561654  | 1.533118  | 12.913936 |
| H | 3.465664  | 1.74108   | 12.349336 |
| C | 0.243797  | 0.995642  | 14.387272 |
| H | -0.654991 | 0.788422  | 14.961875 |
| C | 4.111885  | 6.212168  | 8.805242  |
| C | 5.847165  | 5.322015  | 7.362447  |
| H | 6.772209  | 4.764375  | 7.245251  |
| C | 0.863432  | -0.024934 | 13.65811  |
| H | 0.443176  | -1.02708  | 13.662559 |
| C | 4.642352  | 5.439043  | 15.226716 |
| C | 5.194753  | 5.848469  | 6.244334  |
| H | 5.612679  | 5.705541  | 5.251473  |
| C | 3.456678  | 6.735012  | 7.679238  |
| H | 2.521859  | 7.275148  | 7.793796  |
| C | 0.1878    | 5.212204  | 12.980966 |
| H | 0.139791  | 4.376658  | 12.28959  |
| C | -0.294803 | 8.128939  | 10.431695 |
| H | -0.776886 | 9.050497  | 10.746118 |
| C | 4.838496  | 10.383969 | 10.535959 |
| H | 4.834154  | 11.232705 | 9.859139  |
| C | -1.035651 | 7.131722  | 9.795537  |
| H | -2.095375 | 7.277426  | 9.60378   |
| C | 5.509358  | 10.457656 | 11.776327 |
| H | 6.015231  | 11.376359 | 12.061929 |
| C | 2.021456  | 0.245335  | 12.924121 |

|   |           |          |           |
|---|-----------|----------|-----------|
| H | 2.506369  | -0.54379 | 12.356349 |
| C | -0.411618 | 5.93844  | 9.415033  |
| H | -0.983806 | 5.153092 | 8.92823   |
| C | -0.825013 | 7.190137 | 13.936532 |
| H | -1.656264 | 7.887808 | 13.992003 |
| C | 3.99764   | 6.552788 | 6.405302  |
| H | 3.482596  | 6.96005  | 5.539164  |
| C | 0.306702  | 7.382498 | 14.73326  |
| H | 0.359178  | 8.228523 | 15.413191 |
| C | -0.882776 | 6.100497 | 13.063622 |
| H | -1.752766 | 5.950399 | 12.432611 |

**Table S12.** Cartesian coordinates of the optimized  $S_0$  geometry for complex **2**.

| Atom | x           | y           | z           |
|------|-------------|-------------|-------------|
| Br   | 0.26487448  | -3.44178748 | -0.24066835 |
| Cu   | 0.00681264  | -1.06844504 | -0.15956926 |
| P    | 1.99474079  | 0.10288753  | -0.16251234 |
| P    | -2.03264255 | -0.03391004 | -0.13725955 |
| C    | 3.19117396  | -0.26693668 | -1.49479448 |
| C    | -2.72609582 | 0.13339418  | 1.55989573  |
| C    | -1.86402494 | 0.11650373  | 2.68086042  |
| C    | 2.89138534  | -0.34779255 | 1.37282768  |
| C    | -0.459355   | -0.06384941 | 2.56969827  |
| C    | 2.14140462  | -0.46339437 | 2.56694338  |
| C    | 0.73883007  | -0.24012637 | 2.57101867  |
| C    | 1.93885427  | 1.93366109  | -0.10029644 |
| C    | -2.09492295 | 1.68235361  | -0.78253834 |
| C    | 4.26180151  | -0.59933408 | 1.40029876  |
| H    | 4.83454066  | -0.52811886 | 0.48447594  |
| C    | -4.10054878 | 0.27748897  | 1.76307692  |
| H    | -4.76709817 | 0.26643375  | 0.91057338  |
| C    | -2.41234992 | 0.2665478   | 3.96956232  |
| H    | -1.74520797 | 0.25008803  | 4.82212603  |
| C    | -3.36161556 | -0.88895064 | -1.06526667 |
| C    | 4.89728618  | -0.94725518 | 2.5900504   |
| H    | 5.96303716  | -1.14307392 | 2.59304014  |
| C    | -3.26782384 | -2.28167307 | -1.16943734 |
| H    | -2.406169   | -2.79870912 | -0.75889236 |
| C    | 4.12077964  | 0.66763615  | -1.96330107 |
| H    | 4.13627554  | 1.66911383  | -1.55080386 |
| C    | 3.16645398  | -1.55831266 | -2.03667831 |
| H    | 2.43880223  | -2.28010467 | -1.67817114 |
| C    | 2.79554656  | -0.80605698 | 3.76128835  |

|   |             |             |             |
|---|-------------|-------------|-------------|
| H | 2.2139408   | -0.89429648 | 4.67032748  |
| C | 4.16314378  | -1.04680629 | 3.77062516  |
| H | 4.65416368  | -1.32125742 | 4.69666985  |
| C | -2.21874719 | 2.79354313  | 0.05410182  |
| H | -2.32158527 | 2.65771175  | 1.12330227  |
| C | 2.406718    | 2.67475833  | 0.98733933  |
| H | 2.85933467  | 2.17156323  | 1.83206974  |
| C | -3.778461   | 0.42059712  | 4.14700343  |
| H | -4.18213489 | 0.52938907  | 5.14669674  |
| C | 1.35483602  | 2.60188804  | -1.18370223 |
| H | 0.9691019   | 2.03556382  | -2.02301045 |
| C | -1.94837113 | 1.87874669  | -2.16250081 |
| H | -1.8393812  | 1.02390735  | -2.82093479 |
| C | -4.45131759 | -0.22145467 | -1.63783432 |
| H | -4.51905871 | 0.85814186  | -1.57989535 |
| C | -4.26756563 | -2.99725164 | -1.82437725 |
| H | -4.18581358 | -4.07489445 | -1.90407713 |
| C | 5.00389867  | -0.97738068 | -3.49462898 |
| H | 5.70718145  | -1.25257031 | -4.27234126 |
| C | -4.62845164 | 0.42241924  | 3.04109984  |
| H | -5.69826492 | 0.53190104  | 3.17367082  |
| C | 4.07690684  | -1.90927072 | -3.03003025 |
| H | 4.05532215  | -2.91043408 | -3.44448149 |
| C | 5.02290195  | 0.31143887  | -2.9628583  |
| H | 5.7402999   | 1.03907539  | -3.3249695  |
| C | 1.73530959  | 4.72421514  | -0.10187    |
| H | 1.65714958  | 5.80528461  | -0.10287405 |
| C | -5.35526238 | -2.33170155 | -2.38549403 |
| H | -6.12825101 | -2.89105086 | -2.9000353  |
| C | -2.22125412 | 4.079836    | -0.48251521 |
| H | -2.31559561 | 4.93445568  | 0.17720937  |
| C | -2.10808864 | 4.26742695  | -1.85665167 |
| H | -2.12167878 | 5.26822677  | -2.27257808 |
| C | -5.44369981 | -0.94254708 | -2.29566963 |
| H | -6.283953   | -0.42071733 | -2.73945964 |
| C | -1.96837651 | 3.16208288  | -2.69633299 |
| H | -1.8720496  | 3.30016685  | -3.7672858  |
| C | 2.2985683   | 4.0649278   | 0.9870417   |
| H | 2.66257799  | 4.63060393  | 1.8371947   |
| C | 1.26688869  | 3.98805888  | -1.19002143 |
| H | 0.8167339   | 4.49182598  | -2.03566157 |

**Table S13.** Cartesian coordinates of the optimized  $S_1$  geometry for complex **2**.

| Atom | x           | y           | z           |
|------|-------------|-------------|-------------|
| Br   | 0.98181101  | -2.85930923 | -1.62972555 |
| Cu   | 0.06774651  | -1.07134507 | -0.4309906  |
| P    | 1.95023778  | 0.22341215  | -0.0077889  |
| P    | -1.99292237 | -0.03264616 | -0.11265726 |
| C    | 3.01701067  | 0.760085    | -1.3819739  |
| C    | -2.66761359 | -0.5944577  | 1.46043226  |
| C    | -1.80789157 | -1.33529361 | 2.35554204  |
| C    | 2.92434142  | -0.80508141 | 1.1159236   |
| C    | -0.44068592 | -1.50134819 | 2.14093076  |
| C    | 2.18906535  | -1.62775477 | 2.0431304   |
| C    | 0.79472513  | -1.62059099 | 2.07491178  |
| C    | 1.51451135  | 1.75069742  | 0.8862561   |
| C    | -2.10356348 | 1.7912541   | -0.16424479 |
| C    | 4.31838397  | -0.80427706 | 1.11159687  |
| H    | 4.85121788  | -0.18541176 | 0.39566006  |
| C    | -4.01957195 | -0.41275027 | 1.77594408  |
| H    | -4.65461187 | 0.13565711  | 1.08474598  |
| C    | -2.41779983 | -1.89789656 | 3.52366855  |
| H    | -1.79475257 | -2.47919585 | 4.19685753  |
| C    | -3.18423281 | -0.56099873 | -1.40278775 |
| C    | 5.0405294   | -1.60435085 | 2.00207197  |
| H    | 6.12539758  | -1.61040939 | 1.9760652   |
| C    | -2.98256338 | -1.79703209 | -2.03571364 |
| H    | -2.10390352 | -2.39116691 | -1.80181101 |
| C    | 3.9071941   | 1.83544541  | -1.21256639 |
| H    | 3.94068558  | 2.3694854   | -0.26823147 |
| C    | 2.97777312  | 0.08155484  | -2.60872284 |
| H    | 2.29647588  | -0.75166238 | -2.74424761 |
| C    | 2.9528171   | -2.43146886 | 2.94155158  |
| H    | 2.4221494   | -3.06735648 | 3.64360721  |
| C    | 4.33674185  | -2.41423967 | 2.91557913  |
| H    | 4.88664292  | -3.0456889  | 3.60913806  |
| C    | -2.44383135 | 2.53941482  | 0.96792022  |
| H    | -2.62333062 | 2.03434131  | 1.91143678  |
| C    | 1.48298954  | 1.76392013  | 2.28879153  |
| H    | 1.74847257  | 0.87266766  | 2.84549082  |
| C    | -3.75429938 | -1.70067926 | 3.80313283  |
| H    | -4.17885031 | -2.13824263 | 4.70334657  |
| C    | 1.15388851  | 2.90566627  | 0.17288025  |
| H    | 1.15625502  | 2.89909537  | -0.91245822 |
| C    | -1.85761398 | 2.45061861  | -1.38019381 |
| H    | -1.58828307 | 1.87585836  | -2.26303174 |
| C    | -4.31167143 | 0.20588236  | -1.73655574 |

|   |             |             |             |
|---|-------------|-------------|-------------|
| H | -4.47084563 | 1.17229582  | -1.26805647 |
| C | -3.90344339 | -2.26669758 | -2.97356554 |
| H | -3.73539993 | -3.22510338 | -3.45690847 |
| C | 4.70683602  | 1.53824087  | -3.47788474 |
| H | 5.36068566  | 1.84096608  | -4.29122773 |
| C | -4.57778578 | -0.94075635 | 2.93724498  |
| H | -5.62994062 | -0.79380585 | 3.15879999  |
| C | 3.82121444  | 0.47170103  | -3.65100118 |
| H | 3.78304898  | -0.0594145  | -4.59787703 |
| C | 4.74921287  | 2.21840938  | -2.25656808 |
| H | 5.43822113  | 3.04662757  | -2.11513919 |
| C | 0.79201324  | 4.08438303  | 2.25258545  |
| H | 0.51498927  | 4.99172545  | 2.78245527  |
| C | -5.02824883 | -1.5026535  | -3.29650576 |
| H | -5.74225309 | -1.86643825 | -4.03035084 |
| C | -2.56520802 | 3.92879594  | 0.87823336  |
| H | -2.83175482 | 4.50139171  | 1.76231304  |
| C | -2.35009736 | 4.57752991  | -0.33879725 |
| H | -2.45668773 | 5.6568659   | -0.40794468 |
| C | -5.22826175 | -0.26476398 | -2.67810639 |
| H | -6.09837282 | 0.33642875  | -2.92845428 |
| C | -1.98897838 | 3.83524476  | -1.46883436 |
| H | -1.81237588 | 4.33480251  | -2.41775826 |
| C | 1.11862386  | 2.9289645   | 2.96627695  |
| H | 1.09735056  | 2.93256592  | 4.05244729  |
| C | 0.81299952  | 4.07105416  | 0.85471062  |
| H | 0.54694879  | 4.96183533  | 0.29518819  |

**Table S14.** Cartesian coordinates of the optimized T<sub>1</sub> geometry for complex **2**.

| Atom | x         | y        | z        |
|------|-----------|----------|----------|
| Br   | -0.489946 | 5.112303 | 4.347068 |
| Cu   | 1.185948  | 3.46482  | 4.344873 |
| P    | 2.736415  | 4.133252 | 2.722997 |
| P    | 1.934976  | 1.877982 | 5.849376 |
| C    | 3.455871  | 5.801816 | 2.776    |
| C    | 1.217661  | 0.283077 | 5.367757 |
| C    | 0.566329  | 0.193352 | 4.084902 |
| C    | 1.760244  | 4.005643 | 1.224046 |
| C    | 0.559321  | 1.245427 | 3.175079 |
| C    | 0.810039  | 2.901253 | 1.148482 |
| C    | 0.647599  | 2.02601  | 2.198605 |
| C    | 4.142708  | 2.97833  | 2.593855 |
| C    | 3.719227  | 1.596493 | 6.130397 |

|   |           |           |           |
|---|-----------|-----------|-----------|
| C | 1.808835  | 4.958695  | 0.202046  |
| H | 2.490315  | 5.799461  | 0.291618  |
| C | 1.232761  | -0.822477 | 6.221093  |
| H | 1.718975  | -0.739741 | 7.189338  |
| C | -0.086878 | -1.039424 | 3.760164  |
| H | -0.599212 | -1.114177 | 2.805921  |
| C | 1.29242   | 2.225582  | 7.531881  |
| C | 1.019242  | 4.829549  | -0.937782 |
| H | 1.087923  | 5.562341  | -1.735439 |
| C | 0.158631  | 3.042091  | 7.658662  |
| H | -0.282851 | 3.50426   | 6.779826  |
| C | 4.669527  | 6.10177   | 2.135002  |
| H | 5.219768  | 5.320831  | 1.619487  |
| C | 2.747291  | 6.817117  | 3.43816   |
| H | 1.803382  | 6.587238  | 3.924461  |
| C | 0.031622  | 2.784192  | -0.055488 |
| H | -0.66715  | 1.957335  | -0.137351 |
| C | 0.136792  | 3.719621  | -1.056416 |
| H | -0.477597 | 3.618687  | -1.947382 |
| C | 4.359805  | 0.420909  | 5.722106  |
| H | 3.795241  | -0.351879 | 5.210764  |
| C | 4.112917  | 1.90112   | 1.696216  |
| H | 3.260385  | 1.765973  | 1.039741  |
| C | -0.060226 | -2.111115 | 4.630613  |
| H | -0.561217 | -3.035255 | 4.354035  |
| C | 5.248632  | 3.140984  | 3.443653  |
| H | 5.27317   | 3.959729  | 4.155975  |
| C | 4.464004  | 2.600147  | 6.772745  |
| H | 3.975731  | 3.519346  | 7.086845  |
| C | 1.873924  | 1.665681  | 8.680845  |
| H | 2.766348  | 1.052712  | 8.597123  |
| C | -0.397258 | 3.277093  | 8.918085  |
| H | -1.274074 | 3.912678  | 9.004846  |
| C | 4.460525  | 8.414557  | 2.819299  |
| H | 4.851522  | 9.428352  | 2.837465  |
| C | 0.60834   | -2.021039 | 5.871403  |
| H | 0.615917  | -2.862401 | 6.557327  |
| C | 3.251959  | 8.118659  | 3.456345  |
| H | 2.698875  | 8.900059  | 3.969931  |
| C | 5.167524  | 7.405207  | 2.157794  |
| H | 6.104565  | 7.632377  | 1.656518  |
| C | 6.297978  | 1.193133  | 2.466213  |
| H | 7.135935  | 0.503305  | 2.413649  |
| C | 0.177631  | 2.709502  | 10.057868 |



|   |           |           |           |
|---|-----------|-----------|-----------|
| H | -0.253648 | 2.897404  | 11.037441 |
| C | 5.720436  | 0.237448  | 5.981289  |
| H | 6.207541  | -0.679572 | 5.661495  |
| C | 6.450149  | 1.224214  | 6.646296  |
| H | 7.506074  | 1.07458   | 6.855195  |
| C | 1.31647   | 1.906391  | 9.937133  |
| H | 1.772983  | 1.469138  | 10.821256 |
| C | 5.819702  | 2.411324  | 7.03561   |
| H | 6.383206  | 3.187727  | 7.546258  |
| C | 5.185962  | 1.009802  | 1.639846  |
| H | 5.155811  | 0.178695  | 0.940499  |
| C | 6.328011  | 2.263177  | 3.364626  |
| H | 7.182464  | 2.405326  | 4.018209  |

**Table S15.** Cartesian coordinates of the optimized  $S_0$  geometry for complex **3**.

| Atom | x           | y           | z           |
|------|-------------|-------------|-------------|
| Cu   | -0.00169466 | -1.23881395 | 0.16476822  |
| P    | 2.02552216  | -0.19117912 | 0.13226316  |
| P    | -2.00978314 | -0.11340034 | 0.16689428  |
| Cl   | -0.19662252 | -3.49579    | 0.33024551  |
| C    | -3.18902075 | -0.54930022 | 1.49348817  |
| C    | -2.14855577 | -0.62492762 | -2.57420893 |
| C    | -0.74725826 | -0.39227042 | -2.57474144 |
| C    | 2.08523308  | 1.52290485  | 0.78315176  |
| C    | 0.45047265  | -0.21281444 | -2.57356062 |
| C    | -1.99870771 | 1.71890413  | 0.15002173  |
| C    | 1.85482209  | -0.02800349 | -2.68467273 |
| C    | 2.71815204  | -0.01540097 | -1.56449726 |
| C    | -2.89959131 | -0.54492512 | -1.37778756 |
| C    | 3.34810009  | -1.0537642  | 1.06111481  |
| C    | -4.14334256 | 0.34544436  | 1.98895824  |
| H    | -4.1902942  | 1.356107    | 1.60161118  |
| C    | -4.90034695 | -1.13432356 | -2.60899122 |
| H    | -5.96423004 | -1.33993186 | -2.61677738 |
| C    | -4.26760783 | -0.80948663 | -1.41135936 |
| H    | -4.84040251 | -0.76560877 | -0.49376901 |
| C    | 3.22865749  | -2.44284139 | 1.18821009  |
| H    | 2.3532891   | -2.95006657 | 0.7939566   |
| C    | -2.8002873  | -0.94458599 | -3.77652323 |
| H    | -2.2182587  | -1.00513577 | -4.68757915 |
| C    | -4.16559293 | -1.19744713 | -3.79183161 |
| H    | -4.65435247 | -1.4531868  | -4.72441896 |
| C    | -3.11956341 | -1.85185046 | 2.00451729  |

|   |             |             |             |
|---|-------------|-------------|-------------|
| H | -2.36787107 | -2.53995518 | 1.62886207  |
| C | -1.38108729 | 2.37264393  | 1.22351033  |
| H | -0.9390317  | 1.79393663  | 2.02579217  |
| C | 2.17226214  | 2.63727011  | -0.05420403 |
| H | 2.25601538  | 2.5046462   | -1.12552537 |
| C | 4.09205712  | 0.13188227  | -1.76858359 |
| H | 4.75970223  | 0.11681011  | -0.91707479 |
| C | 4.45317195  | -0.3968846  | 1.6164878   |
| H | 4.53841769  | 0.68066749  | 1.54333932  |
| C | -2.53727939 | 2.47628419  | -0.89285758 |
| H | -3.01499852 | 1.98351887  | -1.7300105  |
| C | 2.40148404  | 0.13068157  | -3.97313352 |
| H | 1.73339894  | 0.1180534   | -4.82503917 |
| C | 4.22049516  | -3.16565824 | 1.84772164  |
| H | 4.11981415  | -4.24018351 | 1.94578686  |
| C | 5.32409437  | -2.51124277 | 2.39036952  |
| H | 6.09052263  | -3.07643326 | 2.90837367  |
| C | -1.8682823  | 4.51251097  | 0.22208016  |
| H | -1.81788572 | 5.59488183  | 0.25008235  |
| C | -5.02866472 | -0.06217607 | 2.98392308  |
| H | -5.76554329 | 0.63423569  | 3.36768657  |
| C | 5.43711779  | -1.12531846 | 2.27856862  |
| H | 6.28947962  | -0.61208663 | 2.7091019   |
| C | 1.9633646   | 1.71520661  | 2.16609519  |
| H | 1.88381133  | 0.85801992  | 2.82558849  |
| C | 4.61834511  | 0.28478474  | -3.04633909 |
| H | 5.68783774  | 0.39667416  | -3.17947393 |
| C | 3.76710967  | 0.28810421  | -4.15129011 |
| H | 4.16944762  | 0.40357127  | -5.15077466 |
| C | 2.07136979  | 4.10701682  | 1.86026171  |
| H | 2.07405936  | 5.10750147  | 2.27715392  |
| C | -4.01371536 | -2.25368786 | 2.99346287  |
| H | -3.95821356 | -3.26265835 | 3.38522596  |
| C | -1.32871781 | 3.76009638  | 1.26528161  |
| H | -0.85071748 | 4.25255367  | 2.10225069  |
| C | 1.96944419  | 2.99838718  | 2.70098043  |
| H | 1.89173624  | 3.13357169  | 3.77381006  |
| C | -4.96694669 | -1.36232956 | 3.48402173  |
| H | -5.65705211 | -1.67765352 | 4.25832823  |
| C | 2.16183507  | 3.92277203  | 0.48392516  |
| H | 2.22781516  | 4.77963103  | -0.17635763 |
| C | -2.46578407 | 3.86836202  | -0.8576884  |
| H | -2.88426913 | 4.44714335  | -1.67325322 |

---

**Table S16.** Cartesian coordinates of the optimized S<sub>1</sub> geometry for complex **3**.

| Atom | x           | y           | z           |
|------|-------------|-------------|-------------|
| Cu   | -0.06392577 | -0.68646886 | 1.18872489  |
| P    | 1.92342218  | 0.00528266  | 0.18767863  |
| P    | -1.97457009 | 0.0679917   | 0.09008231  |
| Cl   | -0.8558542  | -1.33295693 | 3.14720385  |
| C    | -3.02118783 | 1.29890508  | 0.92633935  |
| C    | -2.19788025 | -2.65601312 | -0.40262126 |
| C    | -0.80441115 | -2.65562288 | -0.47620356 |
| C    | 1.95340617  | 1.51740289  | -0.83602361 |
| C    | 0.42014385  | -2.57413294 | -0.66871716 |
| C    | -1.61816275 | 0.75845589  | -1.55708935 |
| C    | 1.7716696   | -2.52166811 | -1.00206981 |
| C    | 2.59652733  | -1.35513368 | -0.7782536  |
| C    | -2.935811   | -1.4460971  | -0.14577297 |
| C    | 3.14440908  | 0.3615181   | 1.5081453   |
| C    | -3.95852192 | 2.05329245  | 0.19848419  |
| H    | -4.03916905 | 1.93021437  | -0.87690799 |
| C    | -5.04719484 | -2.63742194 | -0.30105192 |
| H    | -6.1308969  | -2.63585971 | -0.24405329 |
| C    | -4.32922962 | -1.45461965 | -0.10116895 |
| H    | -4.8643009  | -0.53296635 | 0.10758941  |
| C    | 2.99789435  | -0.27843286 | 2.74869945  |
| H    | 2.1413249   | -0.92025065 | 2.93565955  |
| C    | -2.95687397 | -3.84667332 | -0.60432617 |
| H    | -2.42315241 | -4.77369073 | -0.79004564 |
| C    | -4.34041071 | -3.82938749 | -0.55349216 |
| H    | -4.88681081 | -4.75724893 | -0.70391529 |
| C    | -2.92243448 | 1.46830911  | 2.31540918  |
| H    | -2.20864473 | 0.87975702  | 2.88237795  |
| C    | -1.32529897 | 2.12423776  | -1.70542044 |
| H    | -1.33136916 | 2.78038263  | -0.8411803  |
| C    | 2.24780766  | 1.47280427  | -2.20308676 |
| H    | 2.43691455  | 0.5171913   | -2.6810092  |
| C    | 3.92910425  | -1.3439841  | -1.20952182 |
| H    | 4.53866038  | -0.46368327 | -1.02102591 |
| C    | 4.24334174  | 1.20920504  | 1.29675502  |
| H    | 4.35958036  | 1.72401186  | 0.34793387  |
| C    | -1.57984298 | -0.08485562 | -2.67815252 |
| H    | -1.79189463 | -1.14215761 | -2.56886389 |
| C    | 2.39991652  | -3.65109025 | -1.62073531 |
| H    | 1.8060785   | -4.547538   | -1.77251642 |
| C    | 3.94509095  | -0.08601233 | 3.75566897  |
| H    | 3.81927721  | -0.58565534 | 4.7121058   |

|   |             |             |             |
|---|-------------|-------------|-------------|
| C | 5.04092195  | 0.75355111  | 3.53777211  |
| H | 5.77506774  | 0.90688583  | 4.32399044  |
| C | -1.02013856 | 1.80621892  | -4.08285141 |
| H | -0.79262322 | 2.21435427  | -5.06388424 |
| C | -4.78813273 | 2.96084375  | 0.85712735  |
| H | -5.51360444 | 3.53629305  | 0.28859018  |
| C | 5.1860749   | 1.40211224  | 2.30761622  |
| H | 6.03355046  | 2.05994198  | 2.13381343  |
| C | 1.69176124  | 2.75500251  | -0.22451132 |
| H | 1.45799667  | 2.79622354  | 0.83656662  |
| C | 4.50143472  | -2.44223994 | -1.84499605 |
| H | 5.53817551  | -2.41507438 | -2.16452707 |
| C | 3.71601442  | -3.6066889  | -2.03110753 |
| H | 4.15492024  | -4.48191207 | -2.50371891 |
| C | 2.07796764  | 3.88636428  | -2.32713617 |
| H | 2.13716256  | 4.80542049  | -2.90410799 |
| C | -3.755988   | 2.37917449  | 2.96774382  |
| H | -3.67431786 | 2.50302243  | 4.04387919  |
| C | -1.04623063 | 2.64656104  | -2.96593526 |
| H | -0.83305918 | 3.70518615  | -3.07266529 |
| C | 1.7609798   | 3.93367485  | -0.96490901 |
| H | 1.5714969   | 4.88776951  | -0.48026986 |
| C | -4.68714485 | 3.12654938  | 2.24220733  |
| H | -5.33274922 | 3.83604701  | 2.75262189  |
| C | 2.30987215  | 2.65591142  | -2.94405    |
| H | 2.54173415  | 2.61215692  | -4.00458877 |
| C | -1.27742467 | 0.44115388  | -3.93522168 |
| H | -1.25087076 | -0.21711747 | -4.79900473 |

**Table S17.** Cartesian coordinates of the optimized T<sub>1</sub> geometry for complex **3**.

| Atom | x         | y        | z        |
|------|-----------|----------|----------|
| Cu   | 1.177998  | 3.518614 | 4.315446 |
| P    | 1.939578  | 1.923209 | 5.801536 |
| P    | 2.753008  | 4.148796 | 2.699115 |
| Cl   | -0.359704 | 5.126363 | 4.330719 |
| C    | 3.472636  | 5.815718 | 2.766037 |
| C    | 0.813875  | 2.941502 | 1.11976  |
| C    | 0.641669  | 2.063157 | 2.167622 |
| C    | 3.724927  | 1.666165 | 6.092717 |
| C    | 0.561088  | 1.271907 | 3.134137 |
| C    | 4.1525    | 2.986214 | 2.574921 |
| C    | 0.576133  | 0.224139 | 4.048796 |
| C    | 1.237718  | 0.322411 | 5.325993 |

|   |           |           |           |
|---|-----------|-----------|-----------|
| C | 1.776016  | 4.034031  | 1.200344  |
| C | 1.28284   | 2.284546  | 7.475306  |
| C | 4.684091  | 6.125299  | 2.125346  |
| H | 5.237308  | 5.350649  | 1.603537  |
| C | 1.058352  | 4.867142  | -0.965859 |
| H | 1.139764  | 5.599082  | -1.76311  |
| C | 1.841937  | 4.987372  | 0.177998  |
| H | 2.532539  | 5.820163  | 0.271801  |
| C | 0.140328  | 3.091828  | 7.584679  |
| H | -0.299748 | 3.540977  | 6.698143  |
| C | 0.04059   | 2.834655  | -0.087255 |
| H | -0.667739 | 2.01635   | -0.17303  |
| C | 0.162913  | 3.768336  | -1.088364 |
| H | -0.447611 | 3.6741    | -1.982735 |
| C | 2.75907   | 6.822779  | 3.435763  |
| H | 1.815781  | 6.584728  | 3.919756  |
| C | 5.275905  | 3.163431  | 3.398525  |
| H | 5.318576  | 3.998132  | 4.090947  |
| C | 4.379446  | 0.493163  | 5.699353  |
| H | 3.825514  | -0.289657 | 5.191711  |
| C | 1.267251  | -0.780211 | 6.184185  |
| H | 1.761225  | -0.690383 | 7.147959  |
| C | 1.861821  | 1.743301  | 8.634409  |
| H | 2.760066  | 1.137243  | 8.563603  |
| C | 4.099245  | 1.887383  | 1.704556  |
| H | 3.23242   | 1.739923  | 1.069825  |
| C | -0.075157 | -1.012648 | 3.736693  |
| H | -0.596897 | -1.094047 | 2.78807   |
| C | -0.425445 | 3.337277  | 8.837685  |
| H | -1.308258 | 3.966114  | 8.911357  |
| C | 0.147535  | 2.788744  | 9.987797  |
| H | -0.291354 | 2.984982  | 10.962321 |
| C | 6.296653  | 1.187857  | 2.446433  |
| H | 7.130428  | 0.493051  | 2.393055  |
| C | 5.174533  | 7.431451  | 2.155115  |
| H | 6.109589  | 7.666901  | 1.65395   |
| C | 1.294079  | 1.994274  | 9.88403   |
| H | 1.748633  | 1.571829  | 10.776313 |
| C | 4.455534  | 2.683823  | 6.729361  |
| H | 3.955947  | 3.600796  | 7.031922  |
| C | 0.64709   | -1.983005 | 5.844882  |
| H | 0.666061  | -2.822004 | 6.533463  |
| C | -0.033917 | -2.080704 | 4.61074   |
| H | -0.533291 | -3.008298 | 4.342893  |

|   |          |           |          |
|---|----------|-----------|----------|
| C | 6.456149 | 1.327219  | 6.626849 |
| H | 7.512403 | 1.190499  | 6.842792 |
| C | 3.256025 | 8.127279  | 3.459463 |
| H | 2.698695 | 8.902948  | 3.977087 |
| C | 6.349325 | 2.27823   | 3.318782 |
| H | 7.217468 | 2.431529  | 3.951613 |
| C | 5.811844 | 2.511927  | 7.000467 |
| H | 6.364811 | 3.299264  | 7.505806 |
| C | 4.462643 | 8.433041  | 2.823297 |
| H | 4.847753 | 9.448991  | 2.845998 |
| C | 5.740165 | 0.326087  | 5.968392 |
| H | 6.238396 | -0.589013 | 5.660553 |
| C | 5.166877 | 0.989976  | 1.647799 |
| H | 5.118554 | 0.142374  | 0.969631 |

**Table S18.** Cartesian coordinates of the optimized  $S_0$  geometry for complex **4**.

| Atom | x           | y           | z           |
|------|-------------|-------------|-------------|
| I    | 1.07885603  | 3.07762821  | 1.5225557   |
| Cu   | 0.60833309  | 0.96760437  | 0.12612565  |
| P    | 2.42975321  | -0.43583149 | -0.0825112  |
| P    | -1.43252348 | 0.49216671  | -0.79165205 |
| O    | -5.19282462 | -2.21773424 | 3.01965923  |
| O    | -6.15369475 | -0.94559627 | 0.96405638  |
| C    | -1.91588955 | -1.94161622 | -2.17605633 |
| H    | -2.33099876 | -2.31779903 | -1.24954281 |
| C    | 2.18803483  | -2.05243243 | -0.91268202 |
| C    | -0.63697802 | -1.06066259 | 1.81717538  |
| C    | 0.52434834  | -1.12599127 | 2.15647632  |
| C    | 1.85131639  | -2.04073592 | -2.27191503 |
| H    | 1.75939481  | -1.09792096 | -2.79749391 |
| C    | -2.43771569 | 1.91552621  | -1.36686317 |
| C    | 2.22439996  | -1.53500174 | 3.86511069  |
| H    | 1.43008482  | -1.75089444 | 4.56858225  |
| C    | -3.93464719 | -0.31307478 | 0.21013264  |
| H    | -4.33038267 | 0.22529422  | -0.6378649  |
| C    | 3.55380101  | -1.58090317 | 4.26412033  |
| H    | 3.79879885  | -1.8398875  | 5.28736048  |
| C    | 1.88798496  | -1.18617143 | 2.54743174  |
| C    | 6.05846947  | -0.03325274 | -2.01229539 |
| H    | 6.77218807  | -0.66514117 | -2.52859405 |
| C    | -2.02402635 | -1.01114245 | 1.52029054  |
| C    | -1.43670625 | -0.63186566 | -2.24225469 |
| C    | -3.3444652  | 1.83278529  | -2.43045034 |

|   |             |             |             |
|---|-------------|-------------|-------------|
| H | -3.43869061 | 0.91213425  | -2.99341424 |
| C | 3.96727506  | 0.22079226  | -0.82464213 |
| C | 4.8934879   | -0.58976304 | -1.4897923  |
| H | 4.70256221  | -1.65009809 | -1.60124374 |
| C | 2.27665627  | -3.27435188 | -0.24181199 |
| H | 2.53498046  | -3.29816929 | 0.8090333   |
| C | 1.63345969  | -3.23169675 | -2.95292647 |
| H | 1.37675226  | -3.20735783 | -4.00415622 |
| C | -2.54656954 | -0.34072224 | 0.40237395  |
| C | -4.80591882 | -0.94029822 | 1.08707258  |
| C | -2.91179176 | -1.65568789 | 2.41102524  |
| H | -2.49247406 | -2.16267433 | 3.26734432  |
| C | 6.30647309  | 1.33133028  | -1.86989068 |
| H | 7.21409473  | 1.76234012  | -2.27682107 |
| C | -0.88597786 | -0.16520331 | -3.44349401 |
| H | -0.49843995 | 0.84624819  | -3.50233867 |
| C | 4.21433022  | 1.59269078  | -0.69031712 |
| H | 3.49516471  | 2.22243057  | -0.17690399 |
| C | -4.28107741 | -1.63147651 | 2.20976047  |
| C | -2.30611757 | 3.11726892  | -0.66201737 |
| H | -1.58277392 | 3.19606614  | 0.14247493  |
| C | 4.24739419  | -0.94207786 | 2.04232244  |
| H | 5.03632339  | -0.70412238 | 1.34027748  |
| C | 1.72255257  | -4.44962644 | -2.27894782 |
| H | 1.54281178  | -5.37829689 | -2.80824386 |
| C | -0.85280352 | -0.98301681 | -4.56715916 |
| H | -0.43833755 | -0.60570648 | -5.4951243  |
| C | 2.03890142  | -4.46727992 | -0.92335217 |
| H | 2.10826956  | -5.41013833 | -0.39277365 |
| C | 4.56692356  | -1.28170497 | 3.35496345  |
| H | 5.60437956  | -1.30779287 | 3.66660035  |
| C | -6.72524238 | -0.22646867 | -0.12340908 |
| H | -6.461283   | 0.83471818  | -0.07834863 |
| H | -7.80189233 | -0.34141665 | -0.01767326 |
| H | -6.40472649 | -0.64178265 | -1.08452124 |
| C | -3.08690772 | 4.21679416  | -1.00942259 |
| H | -2.97423889 | 5.14453579  | -0.46077086 |
| C | -4.72249649 | -2.89616571 | 4.17794289  |
| H | -4.19027661 | -2.21292332 | 4.84752102  |
| H | -4.06731905 | -3.73135278 | 3.90935621  |
| H | -5.61132982 | -3.27664262 | 4.67680922  |
| C | 2.91951259  | -0.89708726 | 1.62269758  |
| C | -4.11994518 | 2.93689963  | -2.77531839 |
| H | -4.81743168 | 2.86750908  | -3.60251005 |

|   |             |             |             |
|---|-------------|-------------|-------------|
| C | -3.99533733 | 4.12901111  | -2.06250513 |
| H | -4.59733817 | 4.98852922  | -2.33445047 |
| C | -1.8676602  | -2.76459515 | -3.3000565  |
| H | -2.23958352 | -3.78059553 | -3.23596683 |
| C | -1.347641   | -2.28591807 | -4.49884208 |
| H | -1.32024975 | -2.92451697 | -5.37425053 |
| C | 5.38452001  | 2.14109698  | -1.20825092 |
| H | 5.57108293  | 3.20299086  | -1.09806452 |

**Table S19.** Cartesian coordinates of the optimized S<sub>1</sub> geometry for complex **4**.

| Atom | x           | y           | z           |
|------|-------------|-------------|-------------|
| I    | 1.39463929  | -0.61804137 | 3.3376714   |
| Cu   | 0.57587293  | -0.11900787 | 0.94427319  |
| P    | 2.38153356  | -0.17380963 | -0.5032189  |
| P    | -1.40379698 | 0.87866735  | 0.28627336  |
| O    | -5.27803974 | -3.43955277 | -1.1039131  |
| O    | -6.15107099 | -0.99384415 | -0.88850457 |
| C    | -1.86263232 | 1.90452328  | -2.31208104 |
| H    | -2.41612793 | 0.98974673  | -2.49867611 |
| C    | 1.87075071  | 0.23549682  | -2.21352176 |
| C    | -0.68237295 | -2.0972081  | -0.22046278 |
| C    | 0.49887185  | -2.489944   | -0.24069281 |
| C    | 1.85809352  | 1.57169877  | -2.64166605 |
| H    | 2.18275238  | 2.36144157  | -1.97135586 |
| C    | -2.33961447 | 1.79599829  | 1.57522891  |
| C    | 2.20510708  | -4.26265495 | -0.38780509 |
| H    | 1.42605578  | -5.01125397 | -0.2765513  |
| C    | -3.90064606 | -0.15902662 | -0.41720347 |
| H    | -4.25302229 | 0.85856098  | -0.29353796 |
| C    | 3.52593669  | -4.64164771 | -0.53295431 |
| H    | 3.77592537  | -5.69994055 | -0.53670383 |
| C    | 1.8283653   | -2.88195029 | -0.36893525 |
| C    | 5.95951353  | 1.80533022  | -0.99104539 |
| H    | 6.69056248  | 1.94891067  | -1.78216234 |
| C    | -2.03066716 | -1.75873476 | -0.3606648  |
| C    | -1.25427585 | 2.10190935  | -1.06789046 |
| C    | -3.0524447  | 2.97362382  | 1.30919419  |
| H    | -3.01970836 | 3.41763269  | 0.31947741  |
| C    | 3.86528406  | 0.84825345  | -0.22034996 |
| C    | 4.81513146  | 1.04625817  | -1.23711476 |
| H    | 4.65460053  | 0.61079451  | -2.21864468 |
| C    | 1.43155972  | -0.77211414 | -3.08359428 |
| H    | 1.43182425  | -1.80622818 | -2.75839571 |



|   |             |             |             |
|---|-------------|-------------|-------------|
| C | 1.44484173  | 1.89138021  | -3.93363317 |
| H | 1.44782537  | 2.92746576  | -4.25708231 |
| C | -2.52680182 | -0.42124185 | -0.23718506 |
| C | -4.80441596 | -1.16532126 | -0.71128811 |
| C | -2.98435013 | -2.78853856 | -0.64815654 |
| H | -2.6161492  | -3.80271456 | -0.73694618 |
| C | 6.16564178  | 2.37795446  | 0.26842697  |
| H | 7.05686739  | 2.97026859  | 0.45709396  |
| C | -0.51648827 | 3.27484578  | -0.83950795 |
| H | -0.02655139 | 3.42710222  | 0.11954165  |
| C | 4.07347643  | 1.43402997  | 1.03623496  |
| H | 3.33745094  | 1.30087888  | 1.82231029  |
| C | -4.32560162 | -2.50982323 | -0.82240545 |
| C | -2.39769991 | 1.23936431  | 2.86232334  |
| H | -1.85331626 | 0.32447304  | 3.07658974  |
| C | 4.21505553  | -2.32387863 | -0.65490038 |
| H | 5.00012269  | -1.57909919 | -0.74761334 |
| C | 1.01064476  | 0.88430538  | -4.80023708 |
| H | 0.67953217  | 1.13610009  | -5.80428828 |
| C | -0.4275138  | 4.2554511   | -1.82625959 |
| H | 0.13409322  | 5.16606226  | -1.63457531 |
| C | 0.99896227  | -0.44464583 | -4.37070277 |
| H | 0.6589911   | -1.23200852 | -5.03797774 |
| C | 4.55369586  | -3.68046131 | -0.66456531 |
| H | 5.59052252  | -3.98608839 | -0.76055734 |
| C | -6.66168692 | 0.31825595  | -0.74100685 |
| H | -6.47409687 | 0.70997958  | 0.268539    |
| H | -7.73743701 | 0.24134948  | -0.90910776 |
| H | -6.22367548 | 1.00399551  | -1.48045581 |
| C | -3.15512593 | 1.84592305  | 3.86330024  |
| H | -3.19115138 | 1.40313427  | 4.85494865  |
| C | -4.8735914  | -4.79572477 | -1.21056686 |
| H | -4.43267054 | -5.15340586 | -0.27088424 |
| H | -4.15165505 | -4.93189479 | -2.02660726 |
| H | -5.78258084 | -5.35910363 | -1.42750885 |
| C | 2.89131791  | -1.90928127 | -0.51417942 |
| C | -3.8076128  | 3.58395606  | 2.31511043  |
| H | -4.35457038 | 4.49739619  | 2.09611025  |
| C | -3.8613216  | 3.02332308  | 3.59284606  |
| H | -4.44714959 | 3.49964943  | 4.37424116  |
| C | -1.76000601 | 2.88237104  | -3.30540069 |
| H | -2.23232377 | 2.71851723  | -4.27015111 |
| C | -1.05639033 | 4.06295842  | -3.06121534 |
| H | -0.98656906 | 4.82571472  | -3.8322373  |

|   |            |            |            |
|---|------------|------------|------------|
| C | 5.22078304 | 2.19226791 | 1.28075281 |
| H | 5.37162952 | 2.6406043  | 2.25883535 |

**Table S20.** Cartesian coordinates of the optimized T<sub>1</sub> geometry for complex **4**.

| Atom | x         | y         | z        |
|------|-----------|-----------|----------|
| I    | 2.015276  | 3.880144  | 2.830256 |
| Cu   | -0.467318 | 4.620325  | 2.995647 |
| P    | -1.921372 | 2.921929  | 3.530261 |
| P    | -0.965786 | 6.833009  | 2.650089 |
| O    | 1.264572  | 9.921048  | 7.315765 |
| O    | 0.846376  | 11.132933 | 5.060659 |
| C    | -3.444476 | 7.68689   | 3.708792 |
| H    | -2.921559 | 7.781604  | 4.655778 |
| C    | -3.667157 | 3.406133  | 3.819495 |
| C    | -0.344844 | 5.728617  | 5.498774 |
| C    | -0.553436 | 4.507706  | 5.742687 |
| C    | -4.346255 | 4.061642  | 2.780572 |
| H    | -3.830834 | 4.272172  | 1.847571 |
| C    | -0.220271 | 7.694969  | 1.213929 |
| C    | -0.395037 | 2.701805  | 7.367824 |
| H    | 0.053242  | 3.396985  | 8.070708 |
| C    | -0.022865 | 9.116508  | 4.00107  |
| H    | -0.174466 | 9.628464  | 3.059136 |
| C    | -0.563278 | 1.372949  | 7.695967 |
| H    | -0.251218 | 1.018618  | 8.674769 |
| C    | -0.782517 | 3.195676  | 6.071943 |
| C    | -3.229051 | -0.393094 | 1.428881 |
| H    | -4.15568  | -0.940634 | 1.277097 |
| C    | -0.097342 | 7.056227  | 5.34427  |
| C    | -2.744225 | 7.287638  | 2.562601 |
| C    | -0.761019 | 8.865281  | 0.656232 |
| H    | -1.694508 | 9.268994  | 1.037114 |
| C    | -2.028805 | 1.450793  | 2.449746 |
| C    | -3.219128 | 0.737061  | 2.250806 |
| H    | -4.135348 | 1.064568  | 2.732825 |
| C    | -4.3309   | 3.173952  | 5.031331 |
| H    | -3.813774 | 2.673147  | 5.843505 |
| C    | -5.675991 | 4.446228  | 2.938476 |
| H    | -6.189803 | 4.949221  | 2.125819 |
| C    | -0.337621 | 7.767943  | 4.086189 |
| C    | 0.507795  | 9.825905  | 5.0848   |
| C    | 0.451214  | 7.809689  | 6.454969 |
| H    | 0.633658  | 7.274418  | 7.377637 |

|   |           |           |           |
|---|-----------|-----------|-----------|
| C | -2.051708 | -0.818752 | 0.807433  |
| H | -2.061198 | -1.698194 | 0.168867  |
| C | -3.439364 | 7.156297  | 1.349402  |
| H | -2.912442 | 6.835317  | 0.454524  |
| C | -0.848407 | 1.025382  | 1.818073  |
| H | 0.074046  | 1.582264  | 1.965213  |
| C | 0.744444  | 9.141064  | 6.339121  |
| C | 0.976295  | 7.174057  | 0.697243  |
| H | 1.398839  | 6.266743  | 1.121622  |
| C | -1.525985 | 0.92898   | 5.5037    |
| H | -1.958472 | 0.229585  | 4.794063  |
| C | -6.335322 | 4.209783  | 4.14901   |
| H | -7.368678 | 4.521534  | 4.27608   |
| C | -4.798195 | 7.462911  | 1.276633  |
| H | -5.318655 | 7.376863  | 0.326115  |
| C | -5.658417 | 3.580677  | 5.195921  |
| H | -6.162735 | 3.399121  | 6.141551  |
| C | -1.123297 | 0.468088  | 6.76864   |
| H | -1.242647 | -0.57948  | 7.027394  |
| C | 0.678379  | 11.853102 | 3.84241   |
| H | 1.277628  | 11.409137 | 3.038505  |
| H | 1.028058  | 12.864699 | 4.050562  |
| H | -0.377314 | 11.879124 | 3.545317  |
| C | 1.625564  | 7.822725  | -0.355634 |
| H | 2.551083  | 7.409827  | -0.747359 |
| C | 1.556096  | 9.310532  | 8.567198  |
| H | 2.293828  | 8.507198  | 8.448234  |
| H | 0.645201  | 8.908913  | 9.02921   |
| H | 1.968948  | 10.102858 | 9.192588  |
| C | -1.382374 | 2.259753  | 5.140517  |
| C | -0.110183 | 9.507823  | -0.398849 |
| H | -0.538958 | 10.410509 | -0.826814 |
| C | 1.085886  | 8.988791  | -0.905382 |
| H | 1.590231  | 9.48849   | -1.728267 |
| C | -4.810029 | 7.972727  | 3.638212  |
| H | -5.341614 | 8.277007  | 4.535783  |
| C | -5.487996 | 7.873458  | 2.421628  |
| H | -6.547874 | 8.106727  | 2.366384  |
| C | -0.86284  | -0.108395 | 1.004584  |
| H | 0.054527  | -0.432108 | 0.520479  |

**Table S21.** Cartesian coordinates of the optimized  $S_0$  geometry for complex **5**.

| Atom | x | y | z |
|------|---|---|---|
|------|---|---|---|

---

|    |             |             |             |
|----|-------------|-------------|-------------|
| Br | -0.98967115 | -1.08256598 | -3.31045293 |
| Cu | -0.62699376 | -0.58822268 | -1.00037998 |
| P  | 1.38352354  | -0.92540421 | 0.0367332   |
| P  | -2.48484572 | 0.1941601   | 0.12049341  |
| O  | 6.11402339  | 1.3294491   | 0.03354115  |
| O  | 5.16651972  | 3.71627025  | -0.38306556 |
| C  | -0.5493418  | 2.36173741  | -0.72550707 |
| C  | 1.99214362  | 1.80068147  | -0.35488415 |
| C  | -1.90774251 | 2.70190449  | -0.95944775 |
| C  | 2.88414325  | 2.89331102  | -0.44328298 |
| H  | 2.47025142  | 3.87225016  | -0.63446988 |
| C  | -2.22910248 | 3.94426022  | -1.53046353 |
| H  | -1.42737451 | 4.62564704  | -1.78633232 |
| C  | 2.39295125  | -2.31037452 | -0.61766168 |
| C  | 2.50687926  | 0.51690796  | -0.11107554 |
| C  | 1.34506541  | -1.25179449 | 1.84222081  |
| C  | 3.89240293  | 0.35149426  | 0.01909892  |
| H  | 4.28387946  | -0.64130883 | 0.18109236  |
| C  | -2.32608689 | 0.57992143  | 1.90530669  |
| C  | 4.76814221  | 1.42205859  | -0.07455023 |
| C  | 4.25076309  | 2.72297909  | -0.3050343  |
| C  | 0.60872358  | 2.06027007  | -0.53658621 |
| C  | -2.02383331 | -0.47698791 | 2.77299165  |
| H  | -1.90673558 | -1.48046264 | 2.38152538  |
| C  | -2.94907931 | 1.80394537  | -0.62468136 |
| C  | -4.01554298 | -0.80023892 | 0.00976311  |
| C  | 1.74837921  | -0.30029079 | 2.78126857  |
| H  | 2.13231485  | 0.65614826  | 2.44929319  |
| C  | -2.44653876 | 1.87276707  | 2.42003778  |
| H  | -2.67832467 | 2.69924949  | 1.76056834  |
| C  | -4.99202511 | -0.80851081 | 1.01149908  |
| H  | -4.84718795 | -0.22598272 | 1.91319652  |
| C  | 2.24219563  | -2.62275942 | -1.97354048 |
| H  | 1.50110143  | -2.0999933  | -2.57002082 |
| C  | -3.55202122 | 4.28435675  | -1.78023978 |
| H  | -3.7845999  | 5.24192855  | -2.23094499 |
| C  | -4.27048522 | 2.1596262   | -0.88926273 |
| H  | -5.06638309 | 1.46643835  | -0.6486656  |
| C  | 3.31603937  | -3.02139011 | 0.15922724  |
| H  | 3.42072255  | -2.80131893 | 1.2148766   |
| C  | -1.99383609 | 1.04492646  | 4.64435684  |
| H  | -1.86566712 | 1.22496549  | 5.70550819  |
| C  | 0.83402408  | -2.47820193 | 2.28799241  |
| H  | 0.50601249  | -3.21999133 | 1.5678767   |

|   |             |             |             |
|---|-------------|-------------|-------------|
| C | -1.87288649 | -0.24774162 | 4.13460593  |
| H | -1.64268511 | -1.07455332 | 4.79408316  |
| C | -6.14782274 | -1.56894109 | 0.85107675  |
| H | -6.90125737 | -1.57452282 | 1.63055683  |
| C | 4.09133493  | -4.02289855 | -0.41898136 |
| H | 4.80125318  | -4.57299978 | 0.18846136  |
| C | 1.18721729  | -1.81141137 | 4.58057059  |
| H | 1.1334717   | -2.03027853 | 5.64079674  |
| C | -4.57459123 | 3.39156972  | -1.46354694 |
| H | -5.60708159 | 3.6509967   | -1.66553263 |
| C | -4.20048536 | -1.56231153 | -1.15078416 |
| H | -3.43721717 | -1.56288243 | -1.92307495 |
| C | 3.95017064  | -4.32111979 | -1.77427707 |
| H | 4.55246992  | -5.10321765 | -2.22234083 |
| C | 6.67867383  | 0.03691735  | 0.22533184  |
| H | 6.42775761  | -0.63173967 | -0.60399808 |
| H | 6.33994038  | -0.4069272  | 1.16726446  |
| H | 7.75529219  | 0.1892991   | 0.26070101  |
| C | -2.27463654 | 2.10303524  | 3.78449525  |
| H | -2.36782514 | 3.1106485   | 4.17353493  |
| C | 0.76750244  | -2.76022213 | 3.64769859  |
| H | 0.38563614  | -3.71893893 | 3.97992618  |
| C | 3.02453274  | -3.62274195 | -2.54681024 |
| H | 2.89837161  | -3.86127467 | -3.59638839 |
| C | 1.66582541  | -0.57963278 | 4.14423233  |
| H | 1.97904319  | 0.16787837  | 4.86379613  |
| C | -6.33536866 | -2.31931851 | -0.30909278 |
| H | -7.2358373  | -2.91031414 | -0.43195214 |
| C | -5.36231034 | -2.31365144 | -1.30743362 |
| H | -5.50158286 | -2.89997435 | -2.20822275 |
| C | 4.70354466  | 5.03564577  | -0.64304022 |
| H | 4.18772626  | 5.0910694   | -1.60708997 |
| H | 5.59432037  | 5.65972382  | -0.67002577 |
| H | 4.0354851   | 5.38495441  | 0.15112804  |

**Table S22.** Cartesian coordinates of the optimized S<sub>1</sub> geometry for complex **5**.

| Atom | x           | y           | z           |
|------|-------------|-------------|-------------|
| Br   | -1.61233571 | 0.48942633  | -3.239803   |
| Cu   | -0.60371903 | 0.1084968   | -1.16385135 |
| P    | 1.33197973  | -0.87332273 | -0.31083172 |
| P    | -2.42093326 | 0.245127    | 0.27715971  |
| O    | 6.11599336  | 1.01727177  | 0.67089114  |
| O    | 5.29267077  | 3.48825079  | 0.61773634  |

|   |             |             |             |
|---|-------------|-------------|-------------|
| C | -0.51127    | 2.54475856  | -0.1003456  |
| C | 2.0119715   | 1.80197295  | 0.0608967   |
| C | -1.84192992 | 2.94152033  | -0.00792497 |
| C | 2.98593627  | 2.83805873  | 0.23514724  |
| H | 2.63730692  | 3.86275403  | 0.21547863  |
| C | -2.22211209 | 4.31844643  | -0.07576298 |
| H | -1.44507047 | 5.06070677  | -0.23244102 |
| C | 2.15607553  | -1.90977038 | -1.58107789 |
| C | 2.48212941  | 0.44851947  | 0.07471219  |
| C | 1.24148193  | -1.99183993 | 1.1338388   |
| C | 3.8506195   | 0.18098616  | 0.28562774  |
| H | 4.18556133  | -0.84931511 | 0.2737336   |
| C | -1.91074026 | -0.09722751 | 1.99384107  |
| C | 4.77344687  | 1.19491301  | 0.4729586   |
| C | 4.32162794  | 2.55351955  | 0.43770771  |
| C | 0.66795132  | 2.14852815  | -0.09446605 |
| C | -1.88776559 | -1.4168669  | 2.47399603  |
| H | -2.19325256 | -2.23616558 | 1.8308024   |
| C | -2.90467139 | 1.98063067  | 0.18447783  |
| C | -3.88940237 | -0.79374714 | -0.00073514 |
| C | 1.80475795  | -1.64070657 | 2.36548991  |
| H | 2.28354957  | -0.67338384 | 2.47921821  |
| C | -1.48922761 | 0.95087217  | 2.82557766  |
| H | -1.49465406 | 1.97007528  | 2.45642515  |
| C | -4.80089013 | -1.02820497 | 1.04413536  |
| H | -4.6153524  | -0.61407283 | 2.03011328  |
| C | 1.90772644  | -1.6361719  | -2.93477638 |
| H | 1.18763398  | -0.87146701 | -3.21150151 |
| C | -3.5448499  | 4.7018445   | 0.04312113  |
| H | -3.79715696 | 5.75760648  | -0.02086172 |
| C | -4.23041469 | 2.39595381  | 0.30233522  |
| H | -5.0129875  | 1.65413833  | 0.43344394  |
| C | 3.07087123  | -2.91946351 | -1.24194284 |
| H | 3.25635985  | -3.15734311 | -0.19873877 |
| C | -1.08546692 | -0.63024913 | 4.6147004   |
| H | -0.76920198 | -0.8374046  | 5.6334905   |
| C | 0.60693217  | -3.23712601 | 0.99439422  |
| H | 0.16310642  | -3.51495514 | 0.04141885  |
| C | -1.49557927 | -1.6778223  | 3.78452865  |
| H | -1.49281396 | -2.69917644 | 4.15086207  |
| C | -5.94534174 | -1.79269001 | 0.81658165  |
| H | -6.64744163 | -1.96384925 | 1.62807021  |
| C | 3.73617594  | -3.63150743 | -2.2413439  |
| H | 4.44205727  | -4.41132636 | -1.96734805 |

|   |             |             |             |
|---|-------------|-------------|-------------|
| C | 1.15486081  | -3.78537275 | 3.28591857  |
| H | 1.13070381  | -4.48415885 | 4.1179368   |
| C | -4.57078165 | 3.74981131  | 0.23292645  |
| H | -5.6084058  | 4.05861623  | 0.30652014  |
| C | -4.13633437 | -1.33902449 | -1.26910849 |
| H | -3.43905163 | -1.15795837 | -2.0801347  |
| C | 3.49340446  | -3.34557634 | -3.58830323 |
| H | 4.01047964  | -3.90227577 | -4.36510203 |
| C | 6.60239488  | -0.31210626 | 0.66130107  |
| H | 6.40679711  | -0.80281072 | -0.30250416 |
| H | 6.15260481  | -0.90897406 | 1.46784081  |
| H | 7.67947707  | -0.23789853 | 0.82162312  |
| C | -1.07482893 | 0.68019941  | 4.13112844  |
| H | -0.75132176 | 1.49655068  | 4.77089695  |
| C | 0.57114773  | -4.13224232 | 2.06224904  |
| H | 0.09086676  | -5.09957111 | 1.94035396  |
| C | 2.57684754  | -2.34783973 | -3.93192921 |
| H | 2.3741748   | -2.12711472 | -4.97627466 |
| C | 1.75998099  | -2.53650438 | 3.43713891  |
| H | 2.20121416  | -2.2556099  | 4.38953871  |
| C | -6.18736942 | -2.3339964  | -0.44994279 |
| H | -7.07732654 | -2.93270366 | -0.62393588 |
| C | -5.28214662 | -2.10583908 | -1.48961834 |
| H | -5.46439821 | -2.52484136 | -2.47521848 |
| C | 4.91678924  | 4.85637437  | 0.57198079  |
| H | 4.48116374  | 5.11529496  | -0.40181885 |
| H | 5.83790918  | 5.42108473  | 0.72443917  |
| H | 4.20001966  | 5.09789094  | 1.36792655  |

**Table S23.** Cartesian coordinates of the optimized  $T_1$  geometry for complex **5**.

| Atom | x         | y        | z         |
|------|-----------|----------|-----------|
| Br   | 1.745093  | 1.811201 | 4.276363  |
| Cu   | -0.488972 | 2.038191 | 5.119222  |
| P    | -0.943842 | 1.355092 | 7.25365   |
| P    | -1.954505 | 2.933698 | 3.596374  |
| O    | 0.876039  | 2.948192 | 11.910389 |
| O    | 1.165042  | 5.418501 | 11.174191 |
| C    | -0.638108 | 4.860874 | 5.561715  |
| C    | -0.160125 | 3.996585 | 7.983692  |
| C    | -0.825146 | 5.39533  | 4.312649  |
| C    | 0.350824  | 4.960485 | 8.94188   |
| H    | 0.479637  | 5.979346 | 8.600569  |
| C    | -0.438843 | 6.757719 | 4.050135  |

|   |           |           |           |
|---|-----------|-----------|-----------|
| H | -0.031782 | 7.34383   | 4.868125  |
| C | -0.130682 | -0.188963 | 7.815384  |
| C | -0.337748 | 2.608637  | 8.435007  |
| C | -2.704872 | 1.116802  | 7.719188  |
| C | 0.007634  | 2.273277  | 9.734799  |
| H | -0.097245 | 1.243192  | 10.051581 |
| C | -3.694255 | 3.18248   | 4.123227  |
| C | 0.508587  | 3.217011  | 10.640536 |
| C | 0.675131  | 4.595591  | 10.218507 |
| C | -0.430762 | 4.401735  | 6.717041  |
| C | -4.37774  | 2.07929   | 4.657413  |
| H | -3.868888 | 1.124567  | 4.753392  |
| C | -1.381057 | 4.623269  | 3.217398  |
| C | -2.07951  | 2.121496  | 1.963477  |
| C | -3.421243 | 2.104481  | 8.407321  |
| H | -2.918744 | 3.012251  | 8.727602  |
| C | -4.350494 | 4.417668  | 4.037323  |
| H | -3.830355 | 5.279382  | 3.631087  |
| C | -3.263078 | 2.102169  | 1.212012  |
| H | -4.162441 | 2.567603  | 1.604395  |
| C | 1.076458  | -0.543467 | 7.192009  |
| H | 1.46233   | 0.062005  | 6.374489  |
| C | -0.551962 | 7.291931  | 2.783745  |
| H | -0.238068 | 8.316549  | 2.603319  |
| C | -1.470228 | 5.192897  | 1.95627   |
| H | -1.869952 | 4.604215  | 1.135864  |
| C | -0.634598 | -0.98758  | 8.854896  |
| H | -1.577408 | -0.732029 | 9.329901  |
| C | -6.353028 | 3.436462  | 4.984577  |
| H | -7.382102 | 3.535118  | 5.319987  |
| C | -3.373389 | -0.046237 | 7.302423  |
| H | -2.832139 | -0.81639  | 6.758416  |
| C | -5.702052 | 2.201826  | 5.073757  |
| H | -6.216844 | 1.340142  | 5.486204  |
| C | -3.288147 | 1.48034   | -0.038986 |
| H | -4.209253 | 1.466361  | -0.615962 |
| C | 0.065562  | -2.12091  | 9.273481  |
| H | -0.334162 | -2.736229 | 10.075681 |
| C | -5.429534 | 0.754131  | 8.298522  |
| H | -6.482152 | 0.61196   | 8.527999  |
| C | -1.058238 | 6.515727  | 1.719562  |
| H | -1.134647 | 6.936512  | 0.721669  |
| C | -0.92062  | 1.509305  | 1.457173  |
| H | -0.005611 | 1.513728  | 2.045993  |



|   |           |           |           |
|---|-----------|-----------|-----------|
| C | 1.273427  | -2.465083 | 8.657638  |
| H | 1.816302  | -3.349058 | 8.98201   |
| C | 0.777112  | 1.603584  | 12.375009 |
| H | 1.398615  | 0.933426  | 11.7695   |
| H | -0.264204 | 1.259614  | 12.357099 |
| H | 1.142308  | 1.622465  | 13.402142 |
| C | -5.673247 | 4.543716  | 4.471872  |
| H | -6.171617 | 5.507379  | 4.404538  |
| C | -4.722617 | -0.232172 | 7.602539  |
| H | -5.222561 | -1.14541  | 7.289997  |
| C | 1.774169  | -1.676148 | 7.618202  |
| H | 2.706313  | -1.943699 | 7.128229  |
| C | -4.778    | 1.925263  | 8.689793  |
| H | -5.323034 | 2.701709  | 9.219863  |
| C | -2.131834 | 0.880312  | -0.545957 |
| H | -2.152512 | 0.397121  | -1.519363 |
| C | -0.950674 | 0.896874  | 0.20323   |
| H | -0.051109 | 0.426193  | -0.184093 |
| C | 1.382211  | 6.781443  | 10.827982 |
| H | 2.108232  | 6.865807  | 10.00979  |
| H | 1.779964  | 7.254034  | 11.726676 |
| H | 0.44149   | 7.26628   | 10.537675 |

**Table S24.** Cartesian coordinates of the optimized  $S_0$  geometry for complex **6**.

| Atom | x           | y           | z           |
|------|-------------|-------------|-------------|
| Cu   | 0.64111174  | -0.4949141  | -1.23934074 |
| P    | 2.53008701  | 0.14899772  | -0.09678354 |
| P    | -1.34496364 | -0.93752769 | -0.20376234 |
| Cl   | 0.92386575  | -0.79529679 | -3.47338625 |
| O    | -6.074472   | 1.29821727  | 0.12626994  |
| O    | -5.1287593  | 3.71876367  | 0.00173035  |
| C    | 2.98047357  | 1.84809944  | -0.61865721 |
| C    | 4.04159472  | -0.82858899 | -0.41487734 |
| C    | 1.93510383  | 2.78630926  | -0.79235342 |
| C    | -2.84853841 | 2.90983687  | -0.18986184 |
| H    | -2.43553041 | 3.90505212  | -0.26176732 |
| C    | -1.95710471 | 1.81474708  | -0.24990512 |
| C    | 0.58043165  | 2.41799842  | -0.57973503 |
| C    | -2.4705703  | 0.51033858  | -0.16163711 |
| C    | 2.24847935  | 4.09865666  | -1.18367845 |
| H    | 1.4439537   | 4.81122838  | -1.31613638 |
| C    | 2.44547825  | 0.27374615  | 1.72964868  |
| C    | -4.21358583 | 2.72349638  | -0.05709271 |

|   |             |             |             |
|---|-------------|-------------|-------------|
| C | -0.57561799 | 2.09540246  | -0.41498956 |
| C | 4.29641218  | 2.23717364  | -0.86383067 |
| H | 5.09466121  | 1.51515944  | -0.74792302 |
| C | 3.5661843   | 4.47025777  | -1.41503372 |
| H | 3.79191419  | 5.48342123  | -1.72607664 |
| C | 4.59210805  | 3.53934141  | -1.25970472 |
| H | 5.62036849  | 3.82421467  | -1.4485765  |
| C | -2.35594933 | -2.24233135 | -1.00236246 |
| C | -1.27552041 | -1.46903687 | 1.55137438  |
| C | 5.06900099  | -0.97188254 | 0.52373044  |
| H | 4.97786767  | -0.51168086 | 1.50026033  |
| C | -3.85453226 | 0.33006119  | -0.03689784 |
| H | -4.24576455 | -0.67500649 | 0.00417626  |
| C | 2.61240704  | 1.47562733  | 2.42133072  |
| H | 2.83628657  | 2.38582314  | 1.87981981  |
| C | -4.72989998 | 1.40390531  | 0.01432376  |
| C | 6.20567107  | -1.71037908 | 0.20390315  |
| H | 6.99920712  | -1.82146888 | 0.93415237  |
| C | -0.79061603 | -2.75035777 | 1.84615366  |
| H | -0.50665054 | -3.41869495 | 1.04060461  |
| C | -2.18892084 | -2.41945252 | -2.38075471 |
| H | -1.43668214 | -1.84528705 | -2.91319181 |
| C | 2.49648945  | 1.50689854  | 3.81060587  |
| H | 2.62536112  | 2.44533706  | 4.33792258  |
| C | -3.29038687 | -3.02290674 | -0.31004633 |
| H | -3.40469303 | -2.91009217 | 0.76152732  |
| C | 4.15379112  | -1.43572143 | -1.67229213 |
| H | 3.34805549  | -1.33620311 | -2.39376913 |
| C | -0.69497682 | -3.18000992 | 3.16496506  |
| H | -0.33419306 | -4.17955269 | 3.37976952  |
| C | 2.22535255  | 0.3391325   | 4.51807522  |
| H | 2.14023752  | 0.36438389  | 5.59835154  |
| C | -1.62295804 | -0.61446267 | 2.59983118  |
| H | -1.98710841 | 0.38242876  | 2.38494684  |
| C | -4.06291934 | -3.95764792 | -0.9936141  |
| H | -4.78183401 | -4.56233328 | -0.45220179 |
| C | 6.32203254  | -2.30471724 | -1.05224196 |
| H | 7.20758564  | -2.87930942 | -1.29903953 |
| C | 2.1534609   | -0.89377256 | 2.44594361  |
| H | 2.00035693  | -1.82732987 | 1.91758928  |
| C | 2.05783566  | -0.8632722  | 3.83126093  |
| H | 1.83404001  | -1.7735584  | 4.37243131  |
| C | -2.96884368 | -3.35390223 | -3.0590708  |
| H | -2.83095865 | -3.4882834  | -4.12553789 |

|   |             |             |             |
|---|-------------|-------------|-------------|
| C | -3.90673076 | -4.12006923 | -2.37040536 |
| H | -4.50694375 | -4.85064046 | -2.90075594 |
| C | 5.29712544  | -2.16585142 | -1.98699537 |
| H | 5.38092785  | -2.63262807 | -2.9615182  |
| C | -6.63825961 | -0.00827769 | 0.16456609  |
| H | -6.39892607 | -0.56962541 | -0.74398529 |
| H | -7.71414617 | 0.13823366  | 0.23234456  |
| H | -6.28796332 | -0.56462816 | 1.04021715  |
| C | -1.05795388 | -2.32678307 | 4.20736611  |
| H | -0.98082492 | -2.66076117 | 5.23564579  |
| C | -4.66666299 | 5.06033819  | -0.09401583 |
| H | -4.16239942 | 5.2378711   | -1.04939817 |
| H | -3.98842736 | 5.30569985  | 0.72990483  |
| H | -5.55658517 | 5.68301027  | -0.03058092 |
| C | -1.51053374 | -1.04215034 | 3.92141497  |
| H | -1.78025613 | -0.36888381 | 4.72678761  |

**Table S25.** Cartesian coordinates of the optimized S<sub>1</sub> geometry for complex **6**.

| Atom | x           | y           | z           |
|------|-------------|-------------|-------------|
| Cu   | 0.63642291  | 0.06722993  | -1.39112731 |
| P    | 2.47187467  | 0.30708038  | 0.02283717  |
| P    | -1.23697041 | -0.87014536 | -0.362832   |
| Cl   | 1.53328095  | 0.27868879  | -3.39993768 |
| O    | -6.01604009 | 0.96885272  | 0.7100319   |
| O    | -5.26687507 | 3.44798843  | 0.43483115  |
| C    | 2.9375245   | 2.03688329  | -0.19635712 |
| C    | 3.93144946  | -0.73820172 | -0.26963981 |
| C    | 1.86699433  | 2.9798063   | -0.423975   |
| C    | -2.96059945 | 2.83012262  | 0.00079268  |
| H    | -2.64264642 | 3.85894324  | -0.11049985 |
| C    | -1.96501824 | 1.80896566  | -0.13709122 |
| C    | 0.53604328  | 2.57315913  | -0.45742941 |
| C    | -2.39651475 | 0.44813847  | -0.00531232 |
| C    | 2.23855294  | 4.35069523  | -0.5856044  |
| H    | 1.45446323  | 5.07901032  | -0.76972503 |
| C    | 2.03492389  | 0.06426719  | 1.77487135  |
| C    | -4.27754372 | 2.52784069  | 0.28280778  |
| C    | -0.63772368 | 2.17320753  | -0.3669979  |
| C    | 4.26398764  | 2.46252132  | -0.13619507 |
| H    | 5.05288325  | 1.73283368  | 0.02168599  |
| C    | 3.56212939  | 4.7451084   | -0.52202916 |
| H    | 3.80783579  | 5.79571142  | -0.65702731 |
| C    | 4.59619363  | 3.8105351   | -0.2971967  |

|   |             |             |             |
|---|-------------|-------------|-------------|
| H | 5.63389405  | 4.12642828  | -0.26828173 |
| C | -2.07589218 | -1.98441747 | -1.55434458 |
| C | -1.06504257 | -1.91192468 | 1.12928574  |
| C | 4.89390747  | -0.91928513 | 0.73951565  |
| H | 4.75308141  | -0.4630062  | 1.7142533   |
| C | -3.74716299 | 0.16256988  | 0.2855969   |
| H | -4.05357563 | -0.87391545 | 0.36197132  |
| C | 1.60127211  | 1.15412209  | 2.54511484  |
| H | 1.55429572  | 2.14351225  | 2.10455823  |
| C | -4.68876183 | 1.16414335  | 0.43959495  |
| C | 6.03325428  | -1.68450982 | 0.48960926  |
| H | 6.7751893   | -1.81522341 | 1.27268399  |
| C | -0.41483581 | -3.15275353 | 1.02619616  |
| H | -0.00559401 | -3.47201776 | 0.07079862  |
| C | -1.87830168 | -1.77102737 | -2.92746453 |
| H | -1.18489415 | -1.00668006 | -3.26751044 |
| C | 1.24197266  | 0.96380417  | 3.8805751   |
| H | 0.9092101   | 1.81207117  | 4.47219813  |
| C | -2.95548033 | -2.99598213 | -1.13615434 |
| H | -3.10182462 | -3.18658723 | -0.07714429 |
| C | 4.12144499  | -1.33527205 | -1.52486357 |
| H | 3.38629702  | -1.18897261 | -2.30940703 |
| C | -0.31954783 | -3.9911128  | 2.13564757  |
| H | 0.17291923  | -4.95551714 | 2.04319507  |
| C | 1.31983514  | -0.30710041 | 4.45524485  |
| H | 1.04721196  | -0.45106404 | 5.49726233  |
| C | -1.58445279 | -1.50688919 | 2.36376942  |
| H | -2.07426941 | -0.54213597 | 2.44831836  |
| C | -3.6352954  | -3.77058886 | -2.07740815 |
| H | -4.31324975 | -4.5514971  | -1.74276585 |
| C | 6.21937978  | -2.27774988 | -0.76305837 |
| H | 7.1063644   | -2.87560443 | -0.95437694 |
| C | 2.07841591  | -1.21741239 | 2.34767983  |
| H | 2.39262665  | -2.06962148 | 1.75365133  |
| C | 1.74047257  | -1.39665175 | 3.68686756  |
| H | 1.78907928  | -2.38841181 | 4.12457132  |
| C | -2.5617047  | -2.54608238 | -3.86593243 |
| H | -2.39740596 | -2.37249753 | -4.92573712 |
| C | -3.44236482 | -3.54608487 | -3.44398546 |
| H | -3.97026802 | -4.15203997 | -4.17527573 |
| C | 5.26396197  | -2.10046824 | -1.76724897 |
| H | 5.40415741  | -2.55807919 | -2.74248303 |
| C | -6.46565591 | -0.36910079 | 0.8170841   |
| H | -6.29840727 | -0.92316092 | -0.11730006 |

|   |             |             |             |
|---|-------------|-------------|-------------|
| H | -7.53643263 | -0.309801   | 1.02009641  |
| H | -5.96514318 | -0.89494714 | 1.64296716  |
| C | -0.86056835 | -3.59163901 | 3.36284472  |
| H | -0.79076451 | -4.24667397 | 4.22722912  |
| C | -4.93346247 | 4.81798321  | 0.26959205  |
| H | -4.54697466 | 5.01281367  | -0.73923482 |
| H | -4.1912204  | 5.13812847  | 1.01268452  |
| H | -5.86349384 | 5.36852431  | 0.41964769  |
| C | -1.48178503 | -2.34659457 | 3.47585001  |
| H | -1.88963586 | -2.02480154 | 4.43013496  |

**Table S26.** Cartesian coordinates of the optimized T<sub>1</sub> geometry for complex **6**.

| Atom | x         | y         | z         |
|------|-----------|-----------|-----------|
| Cu   | 11.053566 | 7.294756  | 2.694388  |
| P    | 11.403178 | 9.416986  | 1.88875   |
| P    | 9.684749  | 6.777384  | 4.460264  |
| Cl   | 12.265713 | 5.633748  | 1.720877  |
| O    | 5.40385   | 3.762103  | 4.849726  |
| O    | 4.41292   | 4.529941  | 2.579072  |
| C    | 10.689647 | 9.571992  | 0.214793  |
| C    | 13.148486 | 9.922746  | 1.684187  |
| C    | 9.420147  | 8.916953  | -0.033138 |
| C    | 6.285368  | 5.996534  | 2.135982  |
| H    | 5.908975  | 6.318031  | 1.173623  |
| C    | 7.562937  | 6.537603  | 2.566119  |
| C    | 8.806732  | 8.132442  | 0.911182  |
| C    | 8.0813    | 6.11889   | 3.879827  |
| C    | 8.809046  | 9.093775  | -1.324573 |
| H    | 7.8533    | 8.6141    | -1.51138  |
| C    | 10.63581  | 10.812191 | 2.801478  |
| C    | 5.597313  | 5.097569  | 2.900985  |
| C    | 8.235793  | 7.379962  | 1.742864  |
| C    | 11.291717 | 10.298704 | -0.801867 |
| H    | 12.249881 | 10.774911 | -0.617441 |
| C    | 9.436332  | 9.830097  | -2.308249 |
| H    | 8.964996  | 9.937737  | -3.281488 |
| C    | 10.687617 | 10.433175 | -2.063817 |
| H    | 11.183787 | 11.002968 | -2.843471 |
| C    | 10.29523  | 5.471819  | 5.592726  |
| C    | 9.209706  | 8.152863  | 5.583541  |
| C    | 13.572649 | 11.255374 | 1.792037  |
| H    | 12.855202 | 12.035427 | 2.029511  |
| C    | 7.360262  | 5.198672  | 4.62284   |

|   |           |           |          |
|---|-----------|-----------|----------|
| H | 7.760443  | 4.868161  | 5.572697 |
| C | 9.744192  | 11.715328 | 2.208312 |
| H | 9.48912   | 11.614058 | 1.158332 |
| C | 6.141036  | 4.669931  | 4.178126 |
| C | 14.917733 | 11.579377 | 1.600392 |
| H | 15.241392 | 12.613395 | 1.687708 |
| C | 10.09142  | 8.560421  | 6.597641 |
| H | 11.029088 | 8.0313    | 6.745948 |
| C | 11.210685 | 4.545856  | 5.067296 |
| H | 11.568892 | 4.657476  | 4.045729 |
| C | 9.185868  | 12.752029 | 2.962413 |
| H | 8.492582  | 13.444994 | 2.492551 |
| C | 9.85692   | 5.336516  | 6.920626 |
| H | 9.163312  | 6.059082  | 7.340869 |
| C | 14.081242 | 8.914246  | 1.390794 |
| H | 13.755848 | 7.877762  | 1.32657  |
| C | 9.760095  | 9.624532  | 7.436747 |
| H | 10.443225 | 9.915792  | 8.230644 |
| C | 9.52433   | 12.902659 | 4.308562 |
| H | 9.094273  | 13.711922 | 4.892782 |
| C | 8.013459  | 8.858842  | 5.397335 |
| H | 7.327466  | 8.5645    | 4.608774 |
| C | 10.319662 | 4.281838  | 7.709644 |
| H | 9.979081  | 4.187252  | 8.737754 |
| C | 15.84337  | 10.576103 | 1.296962 |
| H | 16.889858 | 10.829695 | 1.148565 |
| C | 10.952055 | 10.955645 | 4.161452 |
| H | 11.622578 | 10.245239 | 4.63725  |
| C | 10.412439 | 12.002295 | 4.905667 |
| H | 10.668928 | 12.103159 | 5.95529  |
| C | 11.666495 | 3.489901  | 5.861053 |
| H | 12.376663 | 2.779636  | 5.446679 |
| C | 11.223112 | 3.354378  | 7.179324 |
| H | 11.585263 | 2.535452  | 7.795441 |
| C | 15.42297  | 9.246532  | 1.192141 |
| H | 16.140169 | 8.462518  | 0.964834 |
| C | 5.899817  | 3.270375  | 6.093498 |
| H | 6.872689  | 2.78262   | 5.961583 |
| H | 5.162179  | 2.543432  | 6.434243 |
| H | 5.988773  | 4.081372  | 6.826334 |
| C | 8.558791  | 10.315779 | 7.253875 |
| H | 8.303565  | 11.148871 | 7.903186 |
| C | 3.827196  | 4.879073  | 1.330008 |
| H | 4.486271  | 4.600619  | 0.498343 |

|   |          |           |          |
|---|----------|-----------|----------|
| H | 3.611678 | 5.954137  | 1.285969 |
| H | 2.897336 | 4.312402  | 1.271942 |
| C | 7.693912 | 9.937461  | 6.22501  |
| H | 6.765722 | 10.479484 | 6.065457 |

**Table S27.** Cartesian coordinates of the optimized  $S_0$  geometry for complex 7.

| Atom | x           | y           | z           |
|------|-------------|-------------|-------------|
| Cu   | 0.08324416  | -0.63702659 | -0.93743403 |
| P    | 1.91203521  | -0.80518393 | 0.46128496  |
| P    | -2.06849958 | -0.77841056 | -0.17463957 |
| O    | 4.86872187  | 4.37381815  | -0.12780458 |
| O    | 6.22987765  | 2.16079039  | -0.02693827 |
| O    | -4.57358869 | 4.55427075  | 0.96023964  |
| C    | 4.14199608  | 3.2392998   | 0.01812662  |
| C    | 2.75947099  | 3.19175214  | 0.10337291  |
| H    | 2.17392143  | 4.09744563  | 0.046589    |
| C    | 2.82275265  | 0.77286465  | 0.30447507  |
| C    | -3.93313498 | 3.38830011  | 0.7089187   |
| C    | 4.88556494  | 2.03362107  | 0.07371784  |
| C    | -4.18410512 | 1.03796082  | 0.19513772  |
| H    | -4.81385309 | 0.18483394  | -0.0077465  |
| C    | -3.30101469 | -1.54697607 | -1.29613077 |
| C    | 2.08078512  | 1.96389979  | 0.23655326  |
| C    | -2.79240579 | 0.87072754  | 0.1639722   |
| C    | -0.54682898 | 1.91553744  | 0.34864563  |
| C    | -1.96362971 | 1.98096695  | 0.39507059  |
| C    | 1.94336068  | 0.03949271  | 3.17675321  |
| H    | 2.42009454  | 0.94804542  | 2.8316232   |
| C    | 0.66391539  | 1.94720947  | 0.30018118  |
| C    | -2.55821258 | 3.23293147  | 0.67230363  |
| H    | -1.90673172 | 4.07658196  | 0.84558809  |
| C    | 1.62017279  | -0.96726119 | 2.26424007  |
| C    | 4.0035707   | -2.62189611 | 1.09928098  |
| H    | 3.86959038  | -2.32864211 | 2.13337091  |
| C    | -4.76630677 | 2.26741809  | 0.45947548  |
| C    | 3.18597175  | -2.07129252 | 0.10617553  |
| C    | 4.16897425  | 5.60455006  | -0.25053373 |
| H    | 4.93452683  | 6.36695408  | -0.37977334 |
| H    | 3.58581426  | 5.82207181  | 0.65086543  |
| H    | 3.50696703  | 5.5981358   | -1.1225569  |
| C    | 1.65674427  | -0.12389868 | 4.53146262  |
| H    | 1.90979315  | 0.66429332  | 5.23156224  |
| C    | 4.21676334  | 0.82511615  | 0.21968237  |

|   |             |             |             |
|---|-------------|-------------|-------------|
| H | 4.77650461  | -0.09736879 | 0.25692743  |
| C | -4.4249736  | -2.24486203 | -0.83787321 |
| H | -4.57129609 | -2.40121889 | 0.22398587  |
| C | 1.05586908  | -1.29500227 | 4.98499484  |
| H | 0.83780561  | -1.42223603 | 6.03912846  |
| C | 4.98666345  | -3.54865087 | 0.75993411  |
| H | 5.61514831  | -3.97452455 | 1.53393052  |
| C | -5.35223962 | -2.75021555 | -1.74571007 |
| H | -6.21848335 | -3.29306018 | -1.38443834 |
| C | -3.78573944 | 5.71552863  | 1.18857752  |
| H | -3.16535488 | 5.95048005  | 0.31758218  |
| H | -3.14834995 | 5.59517743  | 2.07086426  |
| H | -4.49467388 | 6.5230482   | 1.35930252  |
| C | -5.16426527 | -2.56275212 | -3.11478671 |
| H | -5.88547306 | -2.95948079 | -3.82021744 |
| C | -2.31321025 | -1.6888098  | 1.39998496  |
| C | 3.35741926  | -2.46008636 | -1.22811518 |
| H | 2.7231957   | -2.03494356 | -1.99912726 |
| C | 0.9975928   | -2.13420972 | 2.72405677  |
| H | 0.72217663  | -2.91204824 | 2.0218701   |
| C | -3.10922646 | -1.37181024 | -2.67120819 |
| H | -2.22445091 | -0.85877576 | -3.03266386 |
| C | 7.0118806   | 0.97176717  | -0.03612559 |
| H | 8.0427101   | 1.29953532  | -0.15344351 |
| H | 6.73402466  | 0.32228528  | -0.87207398 |
| H | 6.90731004  | 0.42048622  | 0.90411755  |
| C | -4.04185021 | -1.87631057 | -3.5740099  |
| H | -3.88181619 | -1.73969602 | -4.63711052 |
| C | -6.97083216 | 1.40990314  | 0.21049877  |
| H | -6.79273571 | 1.01367243  | -0.79417133 |
| H | -7.97851524 | 1.81561418  | 0.27122238  |
| H | -6.85436787 | 0.6061659   | 0.94509555  |
| C | -2.12413529 | -3.0774204  | 1.40235332  |
| H | -1.86879566 | -3.588746   | 0.48043103  |
| C | 0.73006941  | -2.30224929 | 4.07680175  |
| H | 0.25116124  | -3.21072387 | 4.41892859  |
| C | -2.28494395 | -3.80757999 | 2.57435272  |
| H | -2.15228438 | -4.88348211 | 2.56032758  |
| C | 5.16141311  | -3.92715136 | -0.57062938 |
| H | 5.92674397  | -4.64880419 | -0.83279616 |
| C | 4.3465805   | -3.38158449 | -1.56168372 |
| H | 4.47477818  | -3.67597825 | -2.59685551 |
| C | -2.62382204 | -1.04174016 | 2.59760132  |
| H | -2.75868766 | 0.03249766  | 2.6102786   |



|   |             |             |             |
|---|-------------|-------------|-------------|
| C | -2.61140753 | -3.15695256 | 3.76468441  |
| H | -2.73447924 | -3.72562911 | 4.67921115  |
| C | -2.76828824 | -1.77421922 | 3.77463233  |
| H | -3.00605056 | -1.26065558 | 4.69897333  |
| I | 0.6890112   | -0.24244243 | -3.40989896 |
| O | -6.10030172 | 2.4986623   | 0.49656291  |

**Table S28.** Cartesian coordinates of the optimized S<sub>1</sub> geometry for complex 7.

| Atom | x           | y           | z           |
|------|-------------|-------------|-------------|
| Cu   | 0.08298537  | -0.35535743 | -0.99704346 |
| P    | 1.86548534  | -0.74165597 | 0.43387915  |
| P    | -2.0663692  | -0.70390783 | -0.20626707 |
| O    | 5.04177924  | 4.30229394  | 0.05584848  |
| O    | 6.32927238  | 2.06487647  | 0.41362326  |
| O    | -4.52234845 | 4.61977734  | 0.88542175  |
| C    | 4.25899683  | 3.19081316  | 0.13240407  |
| C    | 2.88092383  | 3.1941861   | 0.01674066  |
| H    | 2.34273472  | 4.11872571  | -0.14957508 |
| C    | 2.84440296  | 0.76591239  | 0.31530938  |
| C    | -3.87397329 | 3.44097874  | 0.67326556  |
| C    | 4.96429479  | 1.96554458  | 0.33762771  |
| C    | -4.13606556 | 1.03888325  | 0.47421269  |
| H    | -4.7631836  | 0.15514484  | 0.44614365  |
| C    | -3.25630338 | -1.40437466 | -1.41862645 |
| C    | 2.12045485  | 1.98557295  | 0.10204293  |
| C    | -2.7512125  | 0.88739547  | 0.24635089  |
| C    | -0.51526589 | 1.97913259  | 0.06784902  |
| C    | -1.8960791  | 2.04306455  | 0.24409716  |
| C    | 1.16474473  | 0.25925051  | 2.96308741  |
| H    | 1.42060311  | 1.23106855  | 2.55622722  |
| C    | 0.72812677  | 2.00292958  | 0.0061665   |
| C    | -2.51873349 | 3.31979794  | 0.45008432  |
| H    | -1.8819188  | 4.19540607  | 0.43876278  |
| C    | 1.30730864  | -0.8891894  | 2.17168985  |
| C    | 3.88083713  | -2.54824591 | 1.21769108  |
| H    | 3.86832443  | -2.03319164 | 2.17345954  |
| C    | -4.71154261 | 2.27668083  | 0.69478401  |
| C    | 2.9944114   | -2.15503133 | 0.19967404  |
| C    | 4.40577022  | 5.550354    | -0.16723135 |
| H    | 5.20772018  | 6.28989677  | -0.19772261 |
| H    | 3.71086792  | 5.79401329  | 0.64757395  |
| H    | 3.86320935  | 5.55503346  | -1.12180669 |
| C    | 0.69753158  | 0.15018248  | 4.27466685  |

|   |             |             |             |
|---|-------------|-------------|-------------|
| H | 0.58823244  | 1.04539113  | 4.88081189  |
| C | 4.24404632  | 0.7821665   | 0.42735124  |
| H | 4.76830367  | -0.15409998 | 0.57141313  |
| C | -4.29867964 | -2.26710998 | -1.04869283 |
| H | -4.38740562 | -2.60339943 | -0.02050897 |
| C | 0.37930678  | -1.10171265 | 4.80618225  |
| H | 0.02143956  | -1.18504901 | 5.82896879  |
| C | 4.77139055  | -3.60120751 | 1.00652914  |
| H | 5.45527709  | -3.89487474 | 1.79845205  |
| C | -5.22661666 | -2.70133799 | -1.99944386 |
| H | -6.02921163 | -3.37036667 | -1.69964047 |
| C | -3.75574499 | 5.81245126  | 0.86025329  |
| H | -3.27333235 | 5.95415778  | -0.11604847 |
| H | -2.98934606 | 5.80915448  | 1.64698106  |
| H | -4.46307939 | 6.62357409  | 1.04128834  |
| C | -5.12459707 | -2.27863274 | -3.32670878 |
| H | -5.84528999 | -2.61884887 | -4.06533513 |
| C | -2.22041831 | -1.84260395 | 1.22041262  |
| C | 3.00419252  | -2.84401551 | -1.02117612 |
| H | 2.31319624  | -2.5586649  | -1.80742563 |
| C | 0.96015552  | -2.14146134 | 2.70095545  |
| H | 1.0493479   | -3.03488945 | 2.09082429  |
| C | -3.15949699 | -0.98570168 | -2.75474043 |
| H | -2.35723069 | -0.31674347 | -3.0510863  |
| C | 7.05635758  | 0.86783919  | 0.61410547  |
| H | 8.10826093  | 1.15804626  | 0.64509884  |
| H | 6.89618563  | 0.15726525  | -0.20912865 |
| H | 6.78157298  | 0.3859786   | 1.56347943  |
| C | -4.08791471 | -1.41670088 | -3.70144051 |
| H | -3.9996643  | -1.08458287 | -4.7323252  |
| C | -6.90433803 | 1.38111211  | 0.89016859  |
| H | -6.87530001 | 0.87420685  | -0.0847479  |
| H | -7.90895447 | 1.76793192  | 1.07120637  |
| H | -6.64234385 | 0.65987636  | 1.67792541  |
| C | -1.87037064 | -3.19219196 | 1.05223567  |
| H | -1.49130692 | -3.53654504 | 0.09270751  |
| C | 0.5142426   | -2.24747597 | 4.01709587  |
| H | 0.2571668   | -3.22211421 | 4.41976965  |
| C | -2.03049887 | -4.09804281 | 2.09962375  |
| H | -1.76999057 | -5.14339433 | 1.9552483   |
| C | 4.78278316  | -4.27671285 | -0.21838693 |
| H | 5.47532042  | -5.09830921 | -0.3798869  |
| C | 3.89712496  | -3.89765323 | -1.23035715 |
| H | 3.89543058  | -4.4234589  | -2.18107382 |

|   |             |             |             |
|---|-------------|-------------|-------------|
| C | -2.69143659 | -1.40492062 | 2.46269694  |
| H | -2.94401461 | -0.35821823 | 2.59983865  |
| C | -2.52368424 | -3.65959028 | 3.33352544  |
| H | -2.64945161 | -4.36465852 | 4.15102344  |
| C | -2.84040617 | -2.31228975 | 3.51529224  |
| H | -3.20509258 | -1.96272022 | 4.47735829  |
| I | 0.99708907  | -0.27405612 | -3.39334521 |
| O | -6.04498635 | 2.50490029  | 0.91322126  |

**Table S29.** Cartesian coordinates of the optimized T<sub>1</sub> geometry for complex 7.

| Atom | x         | y         | z         |
|------|-----------|-----------|-----------|
| Cu   | 1.442113  | 5.730727  | 11.200388 |
| P    | 3.019986  | 5.407578  | 9.54859   |
| P    | 1.778699  | 6.879882  | 13.15527  |
| O    | 0.889314  | 8.018955  | 4.576749  |
| O    | 2.021294  | 5.692582  | 4.39219   |
| O    | -0.62859  | 12.38532  | 12.793801 |
| C    | 1.318898  | 7.501467  | 5.752857  |
| C    | 1.182237  | 8.096176  | 6.979077  |
| H    | 0.683191  | 9.050539  | 7.086083  |
| C    | 2.347414  | 6.163889  | 8.042173  |
| C    | -0.0663   | 11.150474 | 12.769782 |
| C    | 1.955106  | 6.205558  | 5.641131  |
| C    | 0.75045   | 9.300112  | 14.146991 |
| H    | 0.909933  | 8.855753  | 15.121315 |
| C    | 0.969755  | 6.217003  | 14.663983 |
| C    | 1.64457   | 7.441451  | 8.18476   |
| C    | 1.08984   | 8.564381  | 13.013837 |
| C    | 1.158763  | 8.485894  | 10.536337 |
| C    | 0.854447  | 9.133766  | 11.70286  |
| C    | 5.142797  | 7.177366  | 8.85555   |
| H    | 4.568714  | 7.429415  | 7.96949   |
| C    | 1.404456  | 7.990543  | 9.40456   |
| C    | 0.260006  | 10.449084 | 11.635235 |
| H    | 0.0763    | 10.86324  | 10.652304 |
| C    | 4.642946  | 6.236977  | 9.766019  |
| C    | 4.722971  | 3.369198  | 8.533295  |
| H    | 5.504037  | 4.121895  | 8.483482  |
| C    | 0.182176  | 10.572966 | 14.063501 |
| C    | 3.453718  | 3.708744  | 9.024687  |
| C    | 0.219946  | 9.272603  | 4.608951  |
| H    | -0.042791 | 9.493643  | 3.573697  |
| H    | 0.877561  | 10.059186 | 5.001195  |

|   |           |           |           |
|---|-----------|-----------|-----------|
| H | -0.689929 | 9.215226  | 5.219628  |
| C | 6.379159  | 7.788775  | 9.083243  |
| H | 6.755927  | 8.520738  | 8.373379  |
| C | 2.462257  | 5.583315  | 6.789279  |
| H | 2.964709  | 4.627966  | 6.701663  |
| C | 1.461428  | 6.445654  | 15.959338 |
| H | 2.390826  | 6.989216  | 16.101096 |
| C | 7.130037  | 7.45584   | 10.213008 |
| H | 8.093068  | 7.928607  | 10.387004 |
| C | 4.985082  | 2.063347  | 8.110334  |
| H | 5.972069  | 1.806576  | 7.734052  |
| C | 0.765874  | 5.965488  | 17.071078 |
| H | 1.156995  | 6.144082  | 18.069614 |
| C | -0.92837  | 13.0013   | 11.548895 |
| H | -1.641452 | 12.397913 | 10.972669 |
| H | -0.017247 | 13.158039 | 10.956818 |
| H | -1.376206 | 13.96465  | 11.796456 |
| C | -0.426021 | 5.254328  | 16.899328 |
| H | -0.965022 | 4.878646  | 17.765151 |
| C | 3.515272  | 7.148143  | 13.6939   |
| C | 2.450337  | 2.728205  | 9.093894  |
| H | 1.466624  | 2.988237  | 9.477757  |
| C | 5.392869  | 5.923447  | 10.909663 |
| H | 5.002189  | 5.215338  | 11.634606 |
| C | -0.221908 | 5.494743  | 14.49619  |
| H | -0.600012 | 5.297611  | 13.496234 |
| C | 2.580037  | 4.392101  | 4.227144  |
| H | 2.491683  | 4.168925  | 3.163382  |
| H | 2.023762  | 3.650019  | 4.812183  |
| H | 3.636518  | 4.377484  | 4.522129  |
| C | -0.915803 | 5.020094  | 15.611361 |
| H | -1.835487 | 4.459492  | 15.46823  |
| C | 0.003114  | 10.786602 | 16.42956  |
| H | -0.565509 | 9.857219  | 16.557443 |
| H | -0.369142 | 11.545487 | 17.11878  |
| H | 1.065988  | 10.597118 | 16.626818 |
| C | 4.236796  | 6.070932  | 14.234734 |
| H | 3.751962  | 5.106316  | 14.364544 |
| C | 6.635058  | 6.517479  | 11.124413 |
| H | 7.204613  | 6.263631  | 12.012396 |
| C | 5.563758  | 6.235635  | 14.630699 |
| H | 6.104273  | 5.398314  | 15.064714 |
| C | 3.981853  | 1.091587  | 8.171959  |
| H | 4.187513  | 0.076036  | 7.843632  |

|   |           |           |           |
|---|-----------|-----------|-----------|
| C | 2.715776  | 1.427064  | 8.663175  |
| H | 1.933502  | 0.674891  | 8.718945  |
| C | 4.158991  | 8.37963   | 13.520311 |
| H | 3.615093  | 9.216627  | 13.093263 |
| C | 6.195976  | 7.473216  | 14.46809  |
| H | 7.230754  | 7.601773  | 14.774318 |
| C | 5.49398   | 8.538787  | 13.901958 |
| H | 5.982323  | 9.49894   | 13.758497 |
| I | -0.83528  | 4.659839  | 10.597415 |
| O | -0.186013 | 11.327366 | 15.12659  |

---
